# Supplementary material for: Gut mycobiome core species causally modulate metabolic health in mice
Source: Research Square preprint supplement (doi:10.21203/rs.3.rs-3951673/v1), 2024-02-19
Supplement: Supplementary file 1 [file 156fcc5a91753347bf53a3ee.xlsx]

## Sheet: fungal_CFU
colonization	diet	sex	cage	CFU/mg
B+C	HFHS	F	281B	56493.5
B+C	HFHS	F	2684B	41304.3
B+C	HFHS	F	2706B	61594.2
B+R	HFHS	F	1311B	2595.42
B+R	HFHS	F	4252B	48548.4
B+R	HFHS	F	1344B	51260.5
B+C	SD	F	4013B	1.82278e+06
B+C	SD	F	391B	2.54425e+06
B+C	SD	F	1249B	4.79412e+06
B+R	SD	F	2775B	277778
B+R	SD	F	2023BL	2e+06
B+C	HFHS	M	4213B	55752.2
B+C	HFHS	M	2618B	27472.5
B+C	HFHS	M	1350B	23584.9
B+R	HFHS	M	322B	43214.3
B+R	HFHS	M	2780B	16412.2
B+R	HFHS	M	1328B	27938.9
B+R	HFHS	M	4216B	7500
B+C	SD	M	4204B	1.55294e+06
B+C	SD	M	1245B	944206
B+C	SD	M	4136B	1.45062e+06
B+R	SD	M	4120B	1.68098e+06
B+R	SD	M	1342B	134259
B+R	SD	M	2690B	3.33333e+06
B+R	SD	M	1299B	1.40314e+06
B+R	SD	M	1300B	1.36364e+06
B+R	SD	M	799BL	1.93578e+06

## Sheet: ITS_rDNA
diet	mouse	sex	ITS_ng/ul
C	B3-0	F	0
C	B3-L	F	0
C	B3-R	F	0
C	B3-RL	F	0
C	B4-LL	F	0
C	B4-RL	F	0
C	B7-R	F	0
C	B7-RR	F	0
C	C2-0	F	0.217464
C	C2-L	F	0.223863
C	C2-R	F	0.0594328
C	C2-RR	F	0.177815
C	C4-L	F	0.365331
C	C4-R	F	0.225742
C	C4-RL	F	0.144194
C	C6-0	F	0.273794
C	R6-0	F	0.246511
C	R6-LL	F	0.0310961
C	R6-R	F	0.0456402
C	R6-RL	F	0.0992101
C	R6-RR	F	0.0610235
C	R8-0	F	0.253997
C	R8-L	F	0.0204626
C	R8-LL	F	0.138228
C	B3-RR	M	0
C	B4-L	M	0
C	B4-RR	M	0
C	B4-RRL	M	0
C	B7-L	M	0
C	B7-RL	M	0
C	B9-L	M	0
C	C2-RL	M	0.104269
C	C4-0	M	0.579235
C	C4-LL	M	0.826551
C	C4-LLR	M	0.740678
C	C4-RR	M	0
C	C6-L	M	0.398061
C	C6-R	M	0.145805
C	C6-RL	M	0.361891
C	R1-RL	M	0.418444
C	R1-RR	M	0.603392
C	R6-L	M	0.564625
C	R7-L	M	0.332345
C	R7-R	M	0.394998
C	R7-RL	M	0.101878
C	R8-R	M	0.288274
C	R8-RL	M	0
HFHS	B1-LL	F	0
HFHS	B1-R	F	0
HFHS	B2-RL	F	0
HFHS	B5-0	F	0
HFHS	B5-L	F	0
HFHS	B5-R	F	0.000101736
HFHS	B6-0	F	0
HFHS	B8-L	F	0
HFHS	C1-0	F	0.0298915
HFHS	C1-RL	F	0.0062281
HFHS	C3-0	F	0.0150504
HFHS	C3-RL	F	0.0223333
HFHS	C5-RL	F	0.0278277
HFHS	C7-0	F	0.023996
HFHS	C7-L	F	0.0191466
HFHS	C7-RR	F	0.0114304
HFHS	R2-RL	F	0.00527605
HFHS	R3-RR	F	0.00928795
HFHS	R4-L	F	0.0091475
HFHS	R4-RR	F	0.0096516
HFHS	R5-L	F	0.00627534
HFHS	R5-LL	F	0.0194382
HFHS	B1-L	M	0
HFHS	B1-RL	M	0
HFHS	B1-RR	M	0
HFHS	B2-0	M	0
HFHS	B2-R	M	0
HFHS	B5-RL	M	0
HFHS	B6-R	M	0
HFHS	B8-0	M	0
HFHS	C1-LL	M	0.0110267
HFHS	C1-LLR	M	0.0117662
HFHS	C1-R	M	0.0282146
HFHS	C3-L	M	0.0256019
HFHS	C3-R	M	0.0147373
HFHS	C7-LL	M	0.00492945
HFHS	C7-R	M	0.0154448
HFHS	C7-RL	M	0.0423479
HFHS	R2-0	M	0.00197901
HFHS	R3-R	M	0.0263303
HFHS	R3-RL	M	0.00809125
HFHS	R4-RL	M	0.00394487
HFHS	R4-RRL	M	0.00117382
HFHS	R5-0	M	0.0173175
HFHS	R5-R	M	0.0348488
HFHS	R5-RL	M	0.0103541
CD	B3-R.2	F	2.16797e-05
CD	B4-L.2	F	0
CD	B6-LL.2	F	0
CD	B6-R.2	F	0
CD	B7-0.2	F	0
CD	B7-RL.2	F	0
CD	M1-R	F	0
CD	M4-0	F	0
CD	M6-0	F	0
CD	M6-LLR	F	0
CD	M6-RRL	F	0
CD	M8-0	F	0
CD	M8-R	F	0
CD	M8-RL	F	0
CD	B3-0.2	M	0
CD	B4-0.2	M	0
CD	B6-0.2	M	0
CD	B6-RRL.2	M	0
CD	B7-R.2	M	0
CD	B7-RR.2	M	0
CD	M1-0	M	0
CD	M1-L	M	0
CD	M1-RR	M	0
CD	M4-L	M	0
CD	M6-L	M	0
CD	M6-R	M	0
CD	M9-L	M	0
CD	M9-R	M	0
HFHS	B1-RL.2	F	0
HFHS	B2-0.2	F	0
HFHS	B2-L.2	F	0
HFHS	B2-R.2	F	0
HFHS	B2-RL.2	F	0
HFHS	B5-0.2	F	0
HFHS	M3-0	F	0
HFHS	M3-RL	F	0
HFHS	M3-RRL	F	0
HFHS	M5-L	F	0
HFHS	M5-RL	F	0
HFHS	M5-RR	F	0
HFHS	M9-LL	F	0
HFHS	M9-RL	F	0
HFHS	B1-0.2	M	0
HFHS	B1-L.2	M	0
HFHS	B1-R.2	M	0
HFHS	B1-RR.2	M	0
HFHS	B5-RL.2	M	0
HFHS	B5-RR.2	M	0
HFHS	B8-LL.2	M	0
HFHS	B8-RR.2	M	0
HFHS	M2-R	M	0
HFHS	M3-LLR	M	0
HFHS	M3-R	M	0
HFHS	M3-RR	M	0
HFHS	M5-0	M	0
HFHS	M7-0	M	0
HFHS	M7-R	M	0
HFHS	M7-RL	M	0

## Sheet: sequencing_metadata
ID	sample	age	diet	sex	colonization	experiment
S00J0-0037	B3-0-12w	12	CD	F	B	1
S00J0-0038	B3-L-12w	12	CD	F	B	1
S00J0-0039	B3-R-12w	12	CD	F	B	1
S00J0-0040	B3-RL-12w	12	CD	F	B	1
S00J0-0041	B4-LL-12w	12	CD	F	B	1
S00J0-0042	B4-RL-12w	12	CD	F	B	1
S00J0-0043	B7-R-12w	12	CD	F	B	1
S00J0-0044	B7-RR-12w	12	CD	F	B	1
S00J0-0045	C2-0-12w	12	CD	F	B+C	1
S00J0-0046	C2-L-12w	12	CD	F	B+C	1
S00J0-0047	C2-R-12w	12	CD	F	B+C	1
S00J0-0048	C2-RR-12w	12	CD	F	B+C	1
S00J0-0049	C4-L-12w	12	CD	F	B+C	1
S00J0-0050	C4-R-12w	12	CD	F	B+C	1
S00J0-0051	C4-RL-12w	12	CD	F	B+C	1
S00J0-0052	C6-0-12w	12	CD	F	B+C	1
S00J0-0053	R6-0-12w	12	CD	F	B+R	1
S00J0-0054	R6-LL-12w	12	CD	F	B+R	1
S00J0-0055	R6-R-12w	12	CD	F	B+R	1
S00J0-0056	R6-RL-12w	12	CD	F	B+R	1
S00J0-0057	R6-RR-12w	12	CD	F	B+R	1
S00J0-0058	R8-0-12w	12	CD	F	B+R	1
S00J0-0059	R8-L-12w	12	CD	F	B+R	1
S00J0-0060	R8-LL-12w	12	CD	F	B+R	1
S00J0-0061	B3-RR-12w	12	CD	M	B	1
S00J0-0062	B4-L-12w	12	CD	M	B	1
S00J0-0063	B4-RR-12w	12	CD	M	B	1
S00J0-0064	B4-RRL-12w	12	CD	M	B	1
S00J0-0065	B7-L-12w	12	CD	M	B	1
S00J0-0066	B7-RL-12w	12	CD	M	B	1
S00J0-0067	B9-L-12w	12	CD	M	B	1
S00J0-0068	B9-R-12w	12	CD	M	B	1
S00J0-0069	C2-RL-12w	12	CD	M	B+C	1
S00J0-0070	C4-0-12w	12	CD	M	B+C	1
S00J0-0071	C4-LL-12w	12	CD	M	B+C	1
S00J0-0072	C4-LLR-12w	12	CD	M	B+C	1
S00J0-0073	C4-RR-12w	12	CD	M	B+C	1
S00J0-0074	C6-L-12w	12	CD	M	B+C	1
S00J0-0075	C6-R-12w	12	CD	M	B+C	1
S00J0-0076	C6-RL-12w	12	CD	M	B+C	1
S00J0-0077	R1-RL-12w	12	CD	M	B+R	1
S00J0-0078	R1-RR-12w	12	CD	M	B+R	1
S00J0-0079	R6-L-12w	12	CD	M	B+R	1
S00J0-0080	R7-L-12w	12	CD	M	B+R	1
S00J0-0081	R7-R-12w	12	CD	M	B+R	1
S00J0-0082	R7-RL-12w	12	CD	M	B+R	1
S00J0-0083	R8-R-12w	12	CD	M	B+R	1
S00J0-0084	R8-RL-12w	12	CD	M	B+R	1
S00J0-0085	B1-LL-12w	12	HFHS	F	B	1
S00J0-0086	B1-R-12w	12	HFHS	F	B	1
S00J0-0087	B2-RL-12w	12	HFHS	F	B	1
S00J0-0088	B5-0-12w	12	HFHS	F	B	1
S00J0-0089	B5-L-12w	12	HFHS	F	B	1
S00J0-0090	B5-R-12w	12	HFHS	F	B	1
S00J0-0091	B6-0-12w	12	HFHS	F	B	1
S00J0-0092	B8-L-12w	12	HFHS	F	B	1
S00J0-0093	C1-0-12w	12	HFHS	F	B+C	1
S00J0-0094	C1-RL-12w	12	HFHS	F	B+C	1
S00J0-0095	C3-0-12w	12	HFHS	F	B+C	1
S00J0-0096	C3-RL-12w	12	HFHS	F	B+C	1
S00J0-0097	C5-RL-12w	12	HFHS	F	B+C	1
S00J0-0098	C7-0-12w	12	HFHS	F	B+C	1
S00J0-0099	C7-L -12w	12	HFHS	F	B+C	1
S00J0-0100	C7-RR-12w	12	HFHS	F	B+C	1
S00J0-0101	R2-RL-12w	12	HFHS	F	B+R	1
S00J0-0102	R3-RR-12w	12	HFHS	F	B+R	1
S00J0-0103	R4-L-12w	12	HFHS	F	B+R	1
S00J0-0104	R4-RR-12w	12	HFHS	F	B+R	1
S00J0-0105	R5-L-12w	12	HFHS	F	B+R	1
S00J0-0106	R5-LL-12w	12	HFHS	F	B+R	1
S00J0-0107	B1-L-12w	12	HFHS	M	B	1
S00J0-0108	B1-RL-12w	12	HFHS	M	B	1
S00J0-0109	B1-RR-12w	12	HFHS	M	B	1
S00J0-0110	B2-0-12w	12	HFHS	M	B	1
S00J0-0111	B2-R-12w	12	HFHS	M	B	1
S00J0-0112	B5-RL-12w	12	HFHS	M	B	1
S00J0-0113	B6-R-12w	12	HFHS	M	B	1
S00J0-0114	B8-0-12w	12	HFHS	M	B	1
S00J0-0115	C1-LL-12w	12	HFHS	M	B+C	1
S00J0-0116	C1-LLR-12w	12	HFHS	M	B+C	1
S00J0-0117	C1-R-12w	12	HFHS	M	B+C	1
S00J0-0118	C3-L-12w	12	HFHS	M	B+C	1
S00J0-0119	C3-R-12w	12	HFHS	M	B+C	1
S00J0-0120	C7-LL-12w	12	HFHS	M	B+C	1
S00J0-0121	C7-R-12w	12	HFHS	M	B+C	1
S00J0-0122	C7-RL-12w	12	HFHS	M	B+C	1
S00J0-0123	R2-0-12w	12	HFHS	M	B+R	1
S00J0-0124	R3-R-12w	12	HFHS	M	B+R	1
S00J0-0125	R3-RL-12w	12	HFHS	M	B+R	1
S00J0-0126	R4-RL-12w	12	HFHS	M	B+R	1
S00J0-0127	R4-RRL-12w	12	HFHS	M	B+R	1
S00J0-0128	R5-0-12w	12	HFHS	M	B+R	1
S00J0-0129	R5-R-12w	12	HFHS	M	B+R	1
S00J0-0130	R5-RL-12w	12	HFHS	M	B+R	1
S00J0-0131	B4-LL-3w	3	NA	F	B	1
S00J0-0132	B4-R-3w	3	NA	F	B	1
S00J0-0133	B7-R-3w	3	NA	F	B	1
S00J0-0134	B5-L-3w	3	NA	F	B	1
S00J0-0135	B5-R-3w	3	NA	F	B	1
S00J0-0136	B8-L-3w	3	NA	F	B	1
S00J0-0137	B8-LL-3w	3	NA	F	B	1
S00J0-0138	B8-RL-3w	3	NA	F	B	1
S00J0-0139	C4-L-3w	3	NA	F	B+C	1
S00J0-0140	C4-R-3w	3	NA	F	B+C	1
S00J0-0141	C4-RL-3w	3	NA	F	B+C	1
S00J0-0142	C1-0-3w	3	NA	F	B+C	1
S00J0-0143	C5-L-3w	3	NA	F	B+C	1
S00J0-0144	C5-RR-3w	3	NA	F	B+C	1
S00J0-0145	C7-0-3w	3	NA	F	B+C	1
S00J0-0146	C7-L -3w	3	NA	F	B+C	1
S00J0-0147	R6-LL-3w	3	NA	F	B+R	1
S00J0-0148	R6-R-3w	3	NA	F	B+R	1
S00J0-0149	R6-RR-3w	3	NA	F	B+R	1
S00J0-0150	R8-0-3w	3	NA	F	B+R	1
S00J0-0151	R8-L-3w	3	NA	F	B+R	1
S00J0-0152	R2-RL-3w	3	NA	F	B+R	1
S00J0-0153	R3-RR-3w	3	NA	F	B+R	1
S00J0-0154	R5-L-3w	3	NA	F	B+R	1
S00J0-0155	B3-RR-3w	3	NA	M	B	1
S00J0-0156	B4-RR-3w	3	NA	M	B	1
S00J0-0157	B7-RL-3w	3	NA	M	B	1
S00J0-0158	B9-R-3w	3	NA	M	B	1
S00J0-0159	B2-0-3w	3	NA	M	B	1
S00J0-0160	B2-L-3w	3	NA	M	B	1
S00J0-0161	B5-RR-3w	3	NA	M	B	1
S00J0-0162	B6-R-3w	3	NA	M	B	1
S00J0-0163	C2-RL-3w	3	NA	M	B+C	1
S00J0-0164	C4-0-3w	3	NA	M	B+C	1
S00J0-0165	C6-R-3w	3	NA	M	B+C	1
S00J0-0166	C1-LLR-3w	3	NA	M	B+C	1
S00J0-0167	C1-R-3w	3	NA	M	B+C	1
S00J0-0168	C3-RR-3w	3	NA	M	B+C	1
S00J0-0169	C7-R-3w	3	NA	M	B+C	1
S00J0-0170	C7-RL-3w	3	NA	M	B+C	1
S00J0-0171	R1-RL-3w	3	NA	M	B+R	1
S00J0-0172	R6-L-3w	3	NA	M	B+R	1
S00J0-0173	R7-L-3w	3	NA	M	B+R	1
S00J0-0174	R8-R-3w	3	NA	M	B+R	1
S00J0-0175	R2-0-3w	3	NA	M	B+R	1
S00J0-0176	R3-R-3w	3	NA	M	B+R	1
S00J0-0177	R4-RRL-3w	3	NA	M	B+R	1
S00J0-0178	R5-RL-3w	3	NA	M	B+R	1
S00M2-0001	B2-L-3w.2	3	NA	F	B	2
S00M2-0002	B2-RL-3w.2	3	NA	F	B	2
S00M2-0003	B4-L-3w.2	3	NA	F	B	2
S00M2-0004	B6-LL-3w.2	3	NA	F	B	2
S00M2-0005	B7-0-3w.2	3	NA	F	B	2
S00M2-0006	M3-0-3w	3	NA	F	B+M	2
S00M2-0007	M3-RL-3w	3	NA	F	B+M	2
S00M2-0008	M5-RL-3w	3	NA	F	B+M	2
S00M2-0009	M6-LLR-3w	3	NA	F	B+M	2
S00M2-0010	M6-RR-3w	3	NA	F	B+M	2
S00M2-0011	M8-0-3w	3	NA	F	B+M	2
S00M2-0012	M8-L-3w	3	NA	F	B+M	2
S00M2-0013	M8-RL-3w	3	NA	F	B+M	2
S00M2-0014	B1-0-3w.2	3	NA	M	B	2
S00M2-0015	B1-L-3w.2	3	NA	M	B	2
S00M2-0016	B4-0-3w.2	3	NA	M	B	2
S00M2-0017	B6-0-3w.2	3	NA	M	B	2
S00M2-0018	B6-RL-3w.2	3	NA	M	B	2
S00M2-0019	B7-RR-3w.2	3	NA	M	B	2
S00M2-0020	B8-LL-3w.2	3	NA	M	B	2
S00M2-0021	B8-RR-3w.2	3	NA	M	B	2
S00M2-0022	M1-0-3w	3	NA	M	B+M	2
S00M2-0023	M1-L-3w	3	NA	M	B+M	2
S00M2-0024	M3-LL-3w	3	NA	M	B+M	2
S00M2-0025	M5-0-3w	3	NA	M	B+M	2
S00M2-0026	M5-R-3w	3	NA	M	B+M	2
S00M2-0027	M6-L-3w	3	NA	M	B+M	2
S00M2-0028	M7-0-3w	3	NA	M	B+M	2
S00M2-0029	M7-RL-3w	3	NA	M	B+M	2
S00M2-0030	B3-R-12w.2	12	CD	F	B	2
S00M2-0031	B3-RR-12w.2	12	CD	F	B	2
S00M2-0032	B4-L-12w.2	12	CD	F	B	2
S00M2-0033	B6-LL-12w.2	12	CD	F	B	2
S00M2-0034	B6-R-12w.2	12	CD	F	B	2
S00M2-0035	B7-0-12w.2	12	CD	F	B	2
S00M2-0036	B7-RL-12w.2	12	CD	F	B	2
S00M2-0037	M1-R-12w	12	CD	F	B+M	2
S00M2-0038	M6-LLR-12w	12	CD	F	B+M	2
S00M2-0039	M6-RR-12w	12	CD	F	B+M	2
S00M2-0040	M6-RRL-12w	12	CD	F	B+M	2
S00M2-0041	M8-0-12w	12	CD	F	B+M	2
S00M2-0042	M8-L-12w	12	CD	F	B+M	2
S00M2-0043	M8-R-12w	12	CD	F	B+M	2
S00M2-0044	M8-RL-12w	12	CD	F	B+M	2
S00M2-0045	B3-0-12w.2	12	CD	M	B	2
S00M2-0046	B3-RL-12w.2	12	CD	M	B	2
S00M2-0047	B4-0-12w.2	12	CD	M	B	2
S00M2-0048	B6-RL-12w.2	12	CD	M	B	2
S00M2-0049	B7-L-12w.2	12	CD	M	B	2
S00M2-0050	B7-R-12w.2	12	CD	M	B	2
S00M2-0051	B7-RR-12w.2	12	CD	M	B	2
S00M2-0052	M1-0-12w	12	CD	M	B+M	2
S00M2-0053	M1-RR-12w	12	CD	M	B+M	2
S00M2-0054	M4-L-12w	12	CD	M	B+M	2
S00M2-0055	M4-R-12w	12	CD	M	B+M	2
S00M2-0056	M6-L-12w	12	CD	M	B+M	2
S00M2-0057	M6-R-12w	12	CD	M	B+M	2
S00M2-0058	M9-L-12w	12	CD	M	B+M	2
S00M2-0059	M9-RR-12w	12	CD	M	B+M	2
S00M2-0060	B1-RL-12w.2	12	HFHS	F	B	2
S00M2-0061	B2-0-12w.2	12	HFHS	F	B	2
S00M2-0062	B2-L-12w.2	12	HFHS	F	B	2
S00M2-0063	B2-R-12w.2	12	HFHS	F	B	2
S00M2-0064	B2-RL-12w.2	12	HFHS	F	B	2
S00M2-0065	B5-0-12w.2	12	HFHS	F	B	2
S00M2-0066	B8-0-12w.2	12	HFHS	F	B	2
S00M2-0067	B8-R-12w.2	12	HFHS	F	B	2
S00M2-0068	M3-0-12w	12	HFHS	F	B+M	2
S00M2-0069	M3-RL-12w	12	HFHS	F	B+M	2
S00M2-0070	M3-RRL-12w	12	HFHS	F	B+M	2
S00M2-0071	M5-L-12w	12	HFHS	F	B+M	2
S00M2-0072	M5-RL-12w	12	HFHS	F	B+M	2
S00M2-0073	M5-RR-12w	12	HFHS	F	B+M	2
S00M2-0074	M9-LL-12w	12	HFHS	F	B+M	2
S00M2-0075	M9-RL-12w	12	HFHS	F	B+M	2
S00M2-0076	B1-0-12w.2	12	HFHS	M	B	2
S00M2-0077	B1-R-12w.2	12	HFHS	M	B	2
S00M2-0078	B1-RR-12w.2	12	HFHS	M	B	2
S00M2-0079	B5-R-12w.2	12	HFHS	M	B	2
S00M2-0080	B5-RL-12w.2	12	HFHS	M	B	2
S00M2-0081	B5-RRL-12w.2	12	HFHS	M	B	2
S00M2-0082	B8-LL-12w.2	12	HFHS	M	B	2
S00M2-0083	B8-RR-12w.2	12	HFHS	M	B	2
S00M2-0084	M2-R-12w	12	HFHS	M	B+M	2
S00M2-0085	M3-LL-12w	12	HFHS	M	B+M	2
S00M2-0086	M3-LLR-12w	12	HFHS	M	B+M	2
S00M2-0087	M3-R-12w	12	HFHS	M	B+M	2
S00M2-0088	M3-RR-12w	12	HFHS	M	B+M	2
S00M2-0089	M5-0-12w	12	HFHS	M	B+M	2
S00M2-0090	M7-0-12w	12	HFHS	M	B+M	2
S00M2-0091	M7-L-12w	12	HFHS	M	B+M	2
S00M2-0092	M7-R-12w	12	HFHS	M	B+M	2

## Sheet: metabolomics1
colonization	mouse	sex	diet	L-ALANINE	ACETOACETATE	3-HYDROXYBUTANOIC ACID	L-SERINE	BENZYL ALCOHOL	URACIL	FUMARATE	L-VALINE	SUCCINATE	PHENYLACETALDEHYDE	NICOTINATE	TAURINE	THYMINE	5-OXO-D-PROLINE	4-METHYL-2-OXO-PENTANOIC ACID	4-HYDROXY-L-PROLINE	CREATINE	LEUCINE	GLUTARATE	L-ORNITHINE	L-ASPARTATE	ADENINE	HYPOXANTHINE	PHENYL ACETATE	SALICYLAMIDE	SALICYLATE	ALPHA-KETOGLUTARIC ACID	ADIPIC ACID	L-GLUTAMINE	L-LYSINE	L-GLUTAMIC ACID	XANTHINE	L-ARABITOL	ALLANTOIN	6-CARBOXYHEXANOATE	DL-5-HYDROXYLYSINE	4-COUMARATE	L-PHENYLALANINE	URATE	2-QUINOLINECARBOXYLIC ACID	N-ACETYL-L-LEUCINE	N-ALPHA-ACETYL-L-ASPARAGINE	L-ARGININE	INDOLE-3-ACETATE	CITRULLINE	FORMYL-L-METHIONYL PEPTIDE
B	B3-0	F	SD	14225.9	1152.21	478864	8807.97	0	2.00208e+06	19411.1	1884.03	1.73034e+06	2.25919e+06	592244	4999664	38302.4	1.52048e+06	594640	42102.2	62093.8	7574.62	13154.1	34484.4	15164.5	2.4192e+06	3.76154e+06	58297	4639.88	2966.39	13547.5	35818.1	75872.4	2595.5	836608	1.64446e+06	430853	9661004	27277.4	20638.4	2.13523e+06	55695.8	159450	82527.3	501354	19185.9	160191	10518.6	229208	312320
B	B3-R	F	SD	2713.13	56460	906627	5895.61	31475.7	2.2765e+06	28181.8	2499.65	1.21195e+06	2.17664e+06	741170	7402876	53818.2	1986689	968159	56910.2	58994	12424.2	961237	72635.2	19005.3	434985	3.22636e+06	95718.9	3885.91	4656.25	26966.1	266494	92466	1365.36	858035	1.42338e+06	452484	24245282	287555	21919.6	1897547	57620.6	1.22934e+06	92770.7	4505569	28098	245447	17225.8	291895	406192
B	B4-0	F	SD	2367.49	11308.5	710488	6180.47	2964.1	1.71172e+06	16481.6	1816.28	1.19908e+06	2320671	495255	3.87498e+06	42503.5	1.40439e+06	605567	33876.4	74494.2	10283.2	396230	44073.4	10040.2	699788	3936828	57416.2	4641.24	833.61	9535.12	100377	62315.4	3420.68	967022	1557632	333680	10790251	30957.3	26854.4	2.30878e+06	73988.1	425888	34221.9	377340	19591.6	141732	42202.8	170952	292929
B	B4-LL	F	SD	8683.08	74461.7	484347	8423.31	10237.3	2.1301e+06	9135	4589.75	704462	2182894	647255	3.69471e+06	111821	1.94291e+06	1527568	29408	45564.6	22128.8	1886939	33121.7	14701.7	513626	4002211	78769	5261.23	6692.23	18448.6	230356	78302.4	8127.9	1932728	1.76331e+06	519114	18952738	227915	38818.8	2.21311e+06	152640	937504	78828.5	2.2236e+06	33312.2	84995.9	59172.3	205606	476967
B	B4-R	F	SD	8852.79	6665.87	436815	8983.81	4626.05	2.43557e+06	9187.57	5196.74	537590	1878528	525228	3080664	71740.5	1.57843e+06	1.17161e+06	68367.2	59777.2	13726.9	462021	47761.3	13733.1	853584	2.90032e+06	66213.4	6787.27	4117.56	25137	46628.5	57535.9	5463.47	1.27758e+06	1302153	450492	12187331	32780.5	33414.5	1.93187e+06	136719	800112	90929	599132	27537	139752	58159.9	141812	471802
B	B4-RL	F	SD	3342.39	2398.61	522432	12856.2	1707.97	3.11268e+06	26091.9	6367.6	1664572	2.60088e+06	863183	5260577	86172.4	1921055	1.96267e+06	91324.4	70538.1	14516.6	568657	62464.7	19448.9	251210	4.41411e+06	86276.6	10595.4	3153.49	59985.1	29968.6	115553	6349.09	1.57774e+06	2220344	480576	12783015	67091.5	47782.8	2.40342e+06	170380	887859	119943	659416	10273.7	243551	66787	227098	503209
B	B7-R	F	SD	10045.1	4095.54	246363	19179.8	1350.53	2.1271e+06	24972.2	4504.53	1.87663e+06	1.95239e+06	593914	4.16984e+06	62817.9	1.49091e+06	1.00768e+06	58068.9	66241.3	15199	111912	120093	27277.8	2.07204e+06	3.33895e+06	44979.9	15174.6	2975.75	41448.6	46357.3	89613.1	4876.91	1.18925e+06	1.3468e+06	415623	11544047	49964.6	19451.1	1.84032e+06	91293.4	482445	130243	541841	25042	381939	51490.3	245659	463294
B	B7-RR	F	SD	4490.65	16049.7	658658	5871.71	17357.8	2.11227e+06	16928	2740.65	1.10601e+06	1.44998e+06	593118	3.95597e+06	68582.9	1.70798e+06	1.13643e+06	42805.9	85958.8	15094.2	591613	44465.8	17178.3	1.89865e+06	3.18409e+06	84436.7	9350.39	6647.73	33932.3	181767	76746.2	5237.78	935844	1.56183e+06	449622	18399438	149188	24553.7	1.87902e+06	109476	501025	81954.4	1.37425e+06	32856.4	193107	26193	232400	384323
B+C	C2-0	F	SD	3881.3	77490.9	1298059	30874.2	2791.09	2.39474e+06	128285	11520.1	13506644	1.88394e+06	871844	3977993	49618.6	1.99714e+06	547540	127357	36878.1	31049.5	98718.1	131905	55523.1	544430	5189865	68106.5	3072.19	4908.92	3916.73	147125	375466	12092.3	2.60554e+06	4.30392e+06	1.56367e+06	13002253	35502.8	52910.6	1.84629e+06	234585	156483	97250.5	676281	27075.4	376476	25724	505235	440003
B+C	C2-L	F	SD	11251.1	2874.81	263960	36403.7	1406.03	2834011	90186.5	9961.71	9366851	2.12637e+06	917026	3955812	104514	2286306	484398	75140.8	54116.2	28915.9	276753	176163	54599.6	1.15869e+06	6.5963e+06	68105.9	8451.25	4727.54	23062.1	789417	553792	7654.16	2.72815e+06	5316953	1.98919e+06	13184908	32213.5	42696.8	1905724	225149	348238	207544	476756	29838.8	495947	50639.2	697565	436532
B+C	C2-R	F	SD	4660.15	61422	839325	8848.06	3012.15	1957094	158012	5635.99	12319108	2.23296e+06	714409	4.21495e+06	43508.2	1636381	250423	91612.9	47982.6	21624.7	55825.4	169140	39738.2	724962	5.31951e+06	51667.9	4743.36	4426.52	6786.29	3106870	290291	6841.03	2178763	4556938	1.23584e+06	9100288	23667.2	37331.4	2.47473e+06	159106	193659	50405.4	473053	34743.8	498772	10885.4	233334	368928
B+C	C2-RR	F	SD	7760.04	7335.86	121451	77251	3131.5	2.60166e+06	200889	15161.3	8512859	1.88833e+06	1.03587e+06	4.47925e+06	146209	2.58907e+06	1.04223e+06	132505	11601.7	40354.2	640546	338852	105538	1.22793e+06	6.76626e+06	117735	16775.2	9323.79	45833.2	3825021	532827	11082.9	2.99434e+06	4.41086e+06	5.24923e+06	14606089	123621	31025.1	1.57682e+06	233893	486074	322500	978710	36755.8	858360	108966	641623	504628
B+C	C4-L	F	SD	7876.28	2479.19	144377	13349.2	1890.44	2.13078e+06	116029	8147.42	11472435	1.89571e+06	820537	4.41631e+06	43689.1	1806439	414347	114319	73692.1	26608.9	84889.7	140394	42222.2	309858	5.52066e+06	53759.2	3275.19	3959.37	24235.9	5697732	300909	8777.22	2185592	5.09046e+06	1.79395e+06	8802160	30764.4	47913.9	1.96545e+06	199213	310251	88602.8	771005	28226.1	388842	24571.2	381150	426997
B+C	C4-R	F	SD	6461.31	7270.43	90123.1	33588.6	2054.18	1.79869e+06	114910	11321.7	9799007	1.68918e+06	712795	4.27114e+06	40956.6	1520444	659042	88179.8	68257.3	40977.1	39753.1	147680	52722.8	802268	3.82382e+06	49621.8	5066.66	6309.76	8796.54	791296	322121	10875.9	2.0297e+06	4086318	908550	10728393	21073.3	35627	1.81073e+06	274873	260471	73741.4	855605	46397.6	406461	25769.6	426715	377409
B+C	C4-RL	F	SD	8032.85	4477.15	43518.5	14314.5	1546.03	2.3227e+06	101137	6575.79	15552409	1.51904e+06	1.03457e+06	5290326	47780	1.47369e+06	414496	115488	78699.2	14696.5	101482	122509	44662.1	968482	5.41012e+06	59610.2	7727.64	4471.98	19528.3	1.51587e+06	319345	13210.4	3.20647e+06	6738342	1538784	10317445	31372.7	52238.7	1752453	132559	108354	129236	796875	37641.1	405218	26517.3	379879	385178
B+C	C6-0	F	SD	3668.56	6161.6	78596.5	19950.6	1018.75	3.22814e+06	81347.2	6839.21	5.51129e+06	2.71356e+06	870388	5019798	40752.7	1.70388e+06	500634	71668	40584.6	15727.2	126239	82778.3	38674.3	1.09445e+06	4811081	52526.8	11406.5	2260.79	21812.3	260337	202105	4965.94	2.34658e+06	3.73566e+06	916299	10678756	52340.3	36499.4	2909298	73971.6	289855	72933.7	572971	35185.9	256097	22853.6	423308	433915
B+R	R6-0	F	SD	7393.17	7801.81	249683	27915.7	18767.9	1835319	57040	4625.36	4.7709e+06	2728446	742558	5.81788e+06	81216.1	746605	465223	92505.9	54085.7	16214.4	942025	133136	46157.4	577289	4149224	50611	6358.7	7367.68	19033.7	1.83805e+06	185636	5948.83	1528678	3.17622e+06	2074942	17465550	222745	29798.3	2.63394e+06	63616.7	214682	185927	1.14818e+06	23453.1	391603	64465.4	252796	435473
B+R	R6-LL	F	SD	3088.86	2178.71	121803	19103.8	1459.77	2.16367e+06	34308.8	4833.92	3.28542e+06	1.91608e+06	648762	3942331	37349.5	1.50596e+06	846822	63475.9	42955	14231.8	76694.9	119251	30222.1	335048	3.69884e+06	64073.7	8366.27	2448.53	18188	41406.3	113817	3669.8	1290766	2.19485e+06	1.77865e+06	11276403	21601.5	31486	1.84745e+06	82374.3	140769	140509	427886	18433.8	360723	32214.6	231220	406296
B+R	R6-R	F	SD	3226.88	4297.07	154480	27286.2	1258.51	2.27079e+06	28271.5	2203.84	3306538	2.03266e+06	671952	5.25057e+06	34336.1	1.3915e+06	653532	70241.8	44577.4	12660.4	158029	86474.1	26020	359982	4621746	63447.8	7538.42	635.81	28595.8	214217	160097	3288.68	1.51762e+06	2.13038e+06	1.49724e+06	13114265	31180.8	44424.3	1.75774e+06	92382.3	172572	198105	439109	21379	291937	50336.4	229882	410528
B+R	R6-RL	F	SD	4253.44	76292.1	157983	21009.6	18371.9	1909799	30335.8	4559.85	3.74396e+06	1.95124e+06	657278	5.19427e+06	49864.2	1.28124e+06	688775	63125	70924.2	15572.6	642452	103664	21473.3	455347	3284813	41685.2	7698.52	2803.95	11729.9	623069	106819	6444.94	985810	2.56133e+06	956008	17943528	178107	23497	1.87258e+06	101305	707681	130991	2.9729e+06	33640.4	325088	37955.5	209999	415318
B+R	R6-RR	F	SD	5259.72	8643.64	293464	14709.4	0	1.50984e+06	29656.8	3488.05	2.8251e+06	2.3949e+06	745822	3.32791e+06	70436.5	1.55014e+06	865954	62726.1	33882.2	12782	112557	76852.6	28986.6	259922	3.30351e+06	15329.5	2454.52	4028.13	26317.2	28372.7	128106	2379.53	1.38405e+06	2.3653e+06	1.11558e+06	10967516	39738.7	16452.5	2.51498e+06	77093.9	137617	158588	473466	37516.6	277033	37667.1	262646	393245
B+R	R8-0	F	SD	12583.2	64917.1	399880	23201	46145.2	2832556	39724	3707.25	3.44324e+06	2.32544e+06	829986	8.24419e+06	54562.1	2.27672e+06	963958	60679.3	84723.9	11143.7	2.17136e+06	124707	20991.8	251414	3.03711e+06	66556.3	10358.2	5000.38	30130.1	470540	103574	6242.95	1.04312e+06	3.4659e+06	398673	34604980	683729	19914.3	2.41865e+06	64092.6	1.54831e+06	126483	8176654	41757.9	349584	23126.6	253269	364146
B+R	R8-L	F	SD	11629.1	3326.14	98144.2	17488.1	1977.14	2.71914e+06	32274.2	3856.83	3024456	1.936e+06	837036	4.42013e+06	45337.2	2771969	1.05993e+06	47991.8	55214.5	15795.8	39959.5	82237.3	23003.7	314380	3.73843e+06	64444.8	8368.16	3659.79	19552.9	14493.1	114334	7505.69	1.37246e+06	2463476	307717	18760966	23008.5	24117.4	1863169	107390	314407	76951.2	454186	30602.8	262505	20175.3	317355	347480
B+R	R8-LL	F	SD	5215.77	1114.56	54881.7	11810.9	5208.21	1.86293e+06	20875.7	5924.95	1.7028e+06	1.85713e+06	707712	3.99153e+06	74121.1	1.30288e+06	787710	63150.5	23985.1	17474.5	738070	38208.6	16374.1	324623	3.38097e+06	57288.8	7811.65	4136.97	13501.4	31723.5	107191	1351.95	2.14478e+06	1.29509e+06	614996	14831319	55669.4	29939.5	1.83384e+06	112191	238163	76800.8	771912	23993.3	116434	68909.4	178331	458923
B	B4-L	M	SD	5302.5	6265.59	110051	16517	5415.73	2.35857e+06	25554.1	4740.71	2.60249e+06	1.58789e+06	482710	5.70963e+06	59385.2	1630883	971998	61010.5	91773.8	20085.2	289658	95957.7	17408.2	333994	3296796	79551.8	11485.9	5098.47	41751.8	45629.3	147764	3167.97	1.35569e+06	1499755	681682	16047711	44445.4	36802.6	1.44153e+06	158550	497363	72772.2	330117	31523.1	308039	39661.5	140482	397956
B	B4-RR	M	SD	7638.95	2280.84	232462	8124.07	1771.55	2422767	19826.9	2922.86	2.30701e+06	1.94425e+06	595099	4.75905e+06	59065.2	1604132	792908	69381.9	61836.6	14389.4	129526	82578.6	16196.1	348499	3787732	49089.4	5083.65	5379.9	15067.8	101222	98125.3	3932.17	620459	1.81873e+06	489306	10011781	15525.6	23986.2	1.67366e+06	111789	270758	43508.5	369792	24801.7	253725	13330.2	191584	318961
B	B4-RRL	M	SD	4152.06	3282.67	140750	16635.5	2168.6	1.46429e+06	21904.6	4293.57	1.5554e+06	2.06658e+06	683995	3.74777e+06	20616.2	1.64399e+06	1.42627e+06	55266.8	82741.5	18037.6	75815.7	120859	27316.2	231171	4007604	69204.9	7031.24	3044.17	29158.3	171232	109641	7128.83	1.11908e+06	2.10765e+06	631026	10362007	36106.9	25980.4	2.15524e+06	154812	313528	50593.2	530964	29980.5	356388	28397.7	159761	412516
B	B7-L	M	SD	11760.3	2228.99	394828	26127.8	2762.29	2.14595e+06	39934.6	2832.57	1.81214e+06	2.13782e+06	554770	4.30944e+06	27503.7	1.2949e+06	1.07269e+06	50443.5	84224.6	17403.6	50966.5	232862	19774.7	1.09007e+06	3641424	59797.2	7681.14	4784.83	24423.9	174815	114410	7273.56	462590	1.49473e+06	383438	14246721	45225	19152.5	1.96726e+06	121138	286284	69421.9	426619	40604.8	722290	15229.1	157447	364526
B	B7-RL	M	SD	15131	3939.86	197380	12792.8	1598.76	2.25341e+06	30844.2	2268.16	2.55566e+06	2033050	618132	4554472	40355	2.24015e+06	784942	61882.8	84420.5	11575.7	31744.6	94388.1	23302.5	1.91392e+06	3.00062e+06	68183.7	7816.74	2941.75	21645.8	82414.8	77008.5	3944.32	986684	1.88181e+06	371671	12838251	57183.2	20643.6	1.73942e+06	90350.1	241421	65038.5	789244	28803.6	283552	14295.5	293829	414537
B	B9-0	M	SD	4289.65	3589.94	494234	7209.12	1223.35	1.90645e+06	17093.5	2390.93	987031	2.09086e+06	421897	3646474	32509.7	2203006	402165	50555.5	71966.7	9473.46	19358.3	67642.4	18262.7	322631	2.00532e+06	43567.9	6132.22	2099.21	10182.5	14734.3	66659.9	5045.91	1.18822e+06	986565	329610	8.29562e+06	22821.8	22596	2.13121e+06	51642.2	116224	42851.4	274686	28962.8	205361	4423.54	184725	326515
B	B9-L	M	SD	2837.43	1717.12	424734	13197.8	1014.65	2055378	39791.6	3170.02	2.94965e+06	1.77493e+06	686875	4087971	26289	2.30099e+06	681430	84632.3	47212.7	12485.2	31598.3	98311	22518.5	322961	2.63236e+06	56395.9	13517.6	3047.65	26339.8	35149	78250.2	3753.04	1.13217e+06	1.81498e+06	475488	9107733	45331.8	22598.1	1.73116e+06	72475.1	143367	108029	348194	28907.5	252915	19888.5	251898	394752
B	B9-R	M	SD	6294.22	1466.84	600819	10529.2	0	1.93086e+06	24977.2	2372.35	1949137	1.99778e+06	448387	3184788	27111.6	2.39835e+06	447600	61410.4	49242.9	10801.9	29433	135155	20538.8	189037	1.8855e+06	47160	8602.35	4086.86	18909	27778.2	64286.1	3104.24	980610	869385	336492	7575154	28336.7	21828.3	1.84995e+06	65509.2	145612	79533.9	353598	24631.6	452599	10671.6	118285	341080
B+C	C2-RL	M	SD	6249.05	8456.03	411097	20363.5	2133.33	2.17723e+06	120201	8799.93	12320383	2358026	871797	4.17863e+06	71054.5	2.14279e+06	300139	90626.2	45930.6	20622.5	122789	139216	51484.1	591929	5.99495e+06	70207.6	5643.31	5076.75	20930.8	2968429	362982	11325.9	3.14254e+06	4.40626e+06	2899685	7.17366e+06	68092.2	35025.3	2.26057e+06	152312	144912	116747	798001	39902.8	372747	39400.9	358445	465078
B+C	C4-0	M	SD	11911.6	8415.33	64530.7	19593.9	4343.94	2.26504e+06	147177	5381.22	7.17708e+06	2.34536e+06	763820	3.55737e+06	75140.3	1.96983e+06	549158	82356.8	52464.2	16594.6	167230	155371	54224.3	1.25645e+06	4.95456e+06	37766.5	3763.28	4323.9	24045.8	1.92434e+06	257144	8455.13	1.86487e+06	2.51465e+06	1.50055e+06	11719565	37746	29734.3	2.37732e+06	118524	218906	114470	596081	32042.3	405449	28768.4	385683	449917
B+C	C4-LL	M	SD	5210.86	4681.21	44734.4	18331.2	1167.85	1563957	73246.9	6617.83	7.44223e+06	2.16167e+06	752816	4178334	62361.2	1.92946e+06	1.05108e+06	95145.6	72347.5	19037.3	94005.6	141422	48961.2	756215	4.54296e+06	61666	9546.08	4863.93	20426.2	888414	152726	8157.67	1.5968e+06	3.91024e+06	1090703	10762991	44234.2	35391.7	1.74203e+06	145666	220278	50469.6	584235	23956.3	446952	29175.3	495852	396071
B+C	C4-LLR	M	SD	2099.5	5082.31	73391.5	26633.5	1456.65	2.16811e+06	79245.7	4962.31	12135128	1.68897e+06	805021	4.79527e+06	68702.4	1.34084e+06	352397	144882	72575.4	15135.3	106151	103939	38225.9	472201	6.20352e+06	50351.7	8831.7	1665.46	25175.8	3.18122e+06	104235	12029.1	1821989	5.59003e+06	1.12097e+06	10742751	31320.3	46409.5	1.67236e+06	145408	182835	69191.7	648504	32694.5	295197	27336.5	360135	374372
B+C	C4-RR	M	SD	16512.8	2728.22	61143.7	24882.6	1263.59	2.21501e+06	96391.2	4830.14	4728712	2479549	664078	4313026	85158.6	1.73336e+06	1.01288e+06	88470.2	80801	27700	157543	159037	42184.8	633376	4.2284e+06	46831.4	6554.51	1686.77	14812.1	139209	295454	3775.82	1.53021e+06	3.66902e+06	1.60178e+06	10135640	47514.7	20987.4	2.44507e+06	187643	381119	89465.3	479000	34514.8	444157	38192.3	479222	384401
B+C	C6-L	M	SD	5401.33	2718.15	70321.7	25646.1	878.59	3.00753e+06	73761.3	7254.91	7.83319e+06	1.87149e+06	933628	5027680	77336.8	1.88133e+06	366854	130764	54012.8	16674.1	175697	115327	47363.8	479111	4732862	26900.5	4203.45	3138.49	30705.6	208657	276579	7790.18	2811890	4.54759e+06	987886	11797061	42579.4	55998.1	1.91469e+06	138038	242798	116308	827865	26528.2	302291	24186	443083	463050
B+C	C6-R	M	SD	3499.31	5253.44	72685	27644.6	1648.26	2716397	106305	10254.2	5359952	1950328	853231	5.69998e+06	94165.1	2.38267e+06	896804	79190.9	91873.3	24207.2	327637	158079	51067.5	619475	6.34025e+06	59711.5	11499	3719.06	56256.3	789584	181442	10028.5	1.69587e+06	3.84297e+06	1.36025e+06	13253261	40790.3	31901.4	1805523	175575	297318	121337	647347	35400.4	475546	44614.4	432819	500521
B+C	C6-RL	M	SD	2161.57	4589.87	72261.9	12425.1	774.7	2.31569e+06	91548.1	4536.75	6749800	1.56331e+06	809009	3.43204e+06	54822.8	2060703	457605	91701	56359.2	15196.3	93719.9	114601	25553.7	338014	4185029	54682.3	2552.8	3280.69	15666.7	262385	195228	6501.06	2.02411e+06	3.4987e+06	653866	9537916	41736.9	31727.7	1743928	109706	147050	83560.2	554385	25735.3	339645	17044.2	354214	464188
B+R	R1-RL	M	SD	4276.32	11324.3	164571	26015	1505.56	2.92799e+06	63415.8	4750.35	4.25835e+06	2.48515e+06	799300	5834794	69211	1.78054e+06	610989	105415	71132.5	15983.5	81300.4	118289	33132	203359	6.31839e+06	43845.2	7722.3	4454.81	23298.2	139336	146840	8343.93	2.07095e+06	3443944	1.6169e+06	7873956	36613.1	35432.3	2.34767e+06	138384	210581	74866.2	447035	39291.7	332302	23975.1	356101	464192
B+R	R1-RR	M	SD	7977.24	5775.21	28429	18331.6	1470.21	2.49436e+06	47205.5	2042.08	3693914	2.53012e+06	623251	4.89394e+06	79547.7	1.88899e+06	519139	132639	48008.1	14142.8	58615.5	78830.3	26990.1	309754	4.46283e+06	34720.3	8095.78	4582.19	23879.2	376390	91878.9	6829.59	1.85027e+06	2.86806e+06	1.28987e+06	8458588	44032	24281.8	2.45307e+06	78313.8	164089	78865.3	409348	29461.1	230923	24278	292869	391827
B+R	R6-L	M	SD	9828.94	6222.72	179569	36178.5	7986.78	2.16309e+06	52702.3	5688.39	7.5793e+06	2.18416e+06	687742	5.73108e+06	64320.5	1391800	357502	106027	54883.9	14176.8	329950	129576	44438.7	270955	4375559	44290.8	12348.6	2650.1	9978.29	160302	145622	7671.53	2336333	3.68228e+06	4.66412e+06	10819303	132351	19845.4	458712	138821	170812	143938	711206	30229	361181	46710.9	338840	471681
B+R	R7-L	M	SD	4321.77	5473.66	76525.2	9148.06	2859.23	2.5136e+06	36944.9	3780.67	2.13898e+06	1.9638e+06	618088	3.93666e+06	47732.3	1.99448e+06	746007	76673.4	50425.4	11133.7	168131	86189.1	22494.2	444445	3.63804e+06	74421.2	9028.57	3955.21	33419.8	73005.1	88907.6	4975.98	851181	1.17197e+06	273959	17300186	52795.7	29129.4	790346	68394.8	253429	79447.4	1088515	25280.3	285085	29636.7	249302	448073
B+R	R7-R	M	SD	16634.9	1448.75	38471.2	25885.6	0	2.62908e+06	35419.9	5459.04	2.40266e+06	1.80392e+06	782616	5907288	51096.2	1.89356e+06	942997	116858	58634.6	16806.5	428556	154371	32753.1	764110	5.35457e+06	74536.9	10982.7	2527.3	42883.5	49392.3	137612	4078.64	2187511	2.55875e+06	472415	13490752	43519.2	39567.5	1.70683e+06	113064	260280	109682	708605	30515.5	402910	37236.3	337401	506357
B+R	R7-RL	M	SD	5387.73	5713.13	54273.1	6094.05	3419.09	2.50504e+06	19102.3	2166.32	2389024	2.4248e+06	669281	4220326	59152.2	2.2549e+06	913463	69207	31956.9	9200.39	298618	58436.3	22585.6	239935	3962657	26655.4	3836.91	5479.67	40858.3	265286	56812.8	3882.77	1.22057e+06	2161355	352280	14575053	75108.9	25313.5	2.14103e+06	57820.3	240422	53433.7	1.32247e+06	23948.1	183252	27436.7	158566	388435
B+R	R8-R	M	SD	3843.9	2504.85	63354.1	18763.6	734.51	2.66063e+06	38722.1	2129.89	3.36372e+06	1.8281e+06	732731	3.16372e+06	48175.4	1.93164e+06	541486	84288.6	45519.3	15264.9	259517	98763.2	28214.6	758061	4.46746e+06	43921.8	8434.26	5124.75	13283.5	41220.3	115386	3812.47	1.77166e+06	2146422	396080	14478977	45507.4	13263.5	1.86253e+06	88678.3	218622	48225.7	480392	27311.4	383071	32620.7	207675	481038
B+R	R8-RL	M	SD	3803.49	3814.42	45987.2	11983.8	4031.19	2108660	31276.1	8626.91	2.61295e+06	2.51527e+06	677184	4.31803e+06	56696.5	1940635	773108	100215	45838.7	27757.9	250158	106825	31963.8	1.06586e+06	3.25903e+06	46793	3523.94	4381.33	8847.88	51016	106174	2821.59	2.05588e+06	1.53752e+06	431727	14589285	59723.6	52104.5	2.34493e+06	188139	283112	81100.7	703705	32026.7	321804	65504.2	263256	487105
B	B1-LL	F	HFHS	4815.58	2367.81	30161.1	32867.1	1440.83	1.48063e+06	8749.69	14395.4	1.3465e+06	2.03366e+06	393234	5.63066e+06	36124.2	3.26951e+06	712760	3809.44	65716.4	41092.5	270668	74419.2	18847	88400	3.00886e+06	4793.85	26742.5	4412.36	22547.9	15287.1	132233	5337.46	5.6539e+06	664641	41840.8	11168504	24073.5	7663.63	1.21269e+06	235602	304848	142704	1.26465e+06	70215.1	223806	223331	119421	325142
B	B1-R	F	HFHS	6381.78	0	22272.3	43805.8	0	1.22537e+06	26232	8451.34	5.02478e+06	2.59997e+06	714251	13716909	49473.7	1.01472e+06	793362	5976.04	170861	30873.8	80622.3	171537	19413.8	224573	4.24391e+06	5931.38	24487.9	2694.61	39343.6	103525	170800	12693.8	4.04138e+06	2.1566e+06	23666.3	7.62795e+06	22597.7	5769.61	3.10198e+06	145011	198757	153882	698115	81944.3	479249	40358.4	205010	244513
B	B2-RL	F	HFHS	15051.1	2638.44	113329	33559.8	1011.79	1.81558e+06	33772.6	8562.23	2.76518e+06	1.81486e+06	1.12873e+06	25404216	39230.6	1.30321e+06	1.22443e+06	8025.79	237306	31838	44857.4	247709	34223.2	119000	6.66028e+06	3880.6	24853.8	3126.41	118788	18458.8	111742	13106.6	5.26518e+06	3991714	66656.2	7.23737e+06	21343.8	7326.99	2.01453e+06	161628	154274	73910.2	937780	103423	658278	48283.5	292404	242628
B	B5-0	F	HFHS	13862.8	927.41	25116.4	29477.2	929.76	1.70652e+06	33136.6	6802.14	2783535	2.16486e+06	477543	12210768	60238.8	774076	477436	4582.48	152193	20556.5	111343	142372	28695.1	148298	3505558	6740.47	19082.8	3922.63	51152.8	26936.7	118739	7459.7	2.03373e+06	938342	42971.4	6.65424e+06	19254.2	3796.93	2.48372e+06	138576	169992	102318	657478	76909.2	438265	81657.1	79527.1	136858
B	B5-L	F	HFHS	23119.4	1483.36	21655.1	22904.8	2707.02	1.15198e+06	30660.7	6532.53	2.4802e+06	2.17245e+06	424578	15808533	40492	922988	436694	5584.03	107762	17308.4	136049	126956	18756.8	256741	2826869	2693.53	16546.8	3963.6	33534.1	22778.6	74238.7	6437.21	2766391	852344	19797.9	5.79449e+06	24292.5	2103.75	2610148	118087	101135	157340	862123	73321.1	356259	74396.6	83734	226753
B	B5-R	F	HFHS	4650.07	2427.46	21851.3	14740.7	717.01	1.52798e+06	30624.1	7039.04	1.38502e+06	2936580	487374	13840296	35736.7	1.06486e+06	702708	4380.53	175449	30354.1	119696	124681	21726.6	233322	3.51923e+06	13566.8	7456.49	2817.45	36752.2	27204.3	85017.8	5990.32	3.52962e+06	1.30316e+06	22000.2	8.01781e+06	22032	2581.01	3.22751e+06	170974	169337	120052	1.72005e+06	78541.5	309383	82185.9	168097	343607
B	B6-0	F	HFHS	6373.74	2407.64	25859.3	27537.5	1164.25	1.86885e+06	16228.5	8032.47	1.10284e+06	2.11305e+06	421286	16890890	51746.2	1499854	817803	4435.29	181689	29019.6	86156.4	97108.9	23223.6	144437	2472837	2514.09	16586	2927.86	25415.5	22827.1	135082	11006.5	3107273	1.86195e+06	8392.68	3.30807e+06	25451.4	3936.06	2.45677e+06	198930	413386	47721.7	646905	87017.8	230508	27561.5	180374	246835
B	B8-L	F	HFHS	5052.94	1137.72	10207.3	54247.9	953.23	1.75584e+06	25586.7	7423.75	3.2277e+06	2098045	640127	17311656	67245.2	1.01034e+06	680250	2565.86	196501	33393.4	126583	199282	33740.2	134305	3.81652e+06	6483.53	23224.6	4723.96	47262.3	107411	238584	11355.9	4.41646e+06	1.37162e+06	60110.4	9909087	20010	3463.25	2.34423e+06	199990	282962	135483	819335	108988	501492	73595.6	171160	225220
B+C	C1-0	F	HFHS	15679.5	357.82	13169.9	72434.7	1470.15	2775828	44399.7	15683.8	677002	2.85465e+06	902562	9071039	105608	4.15366e+06	1.67581e+06	6004.67	122124	48774.2	120041	355524	38215	365602	5280928	4117.09	24596.8	6633.16	63370.8	44075.8	287283	17638.5	3534904	2.04615e+06	405138	11703959	27068.3	6441.77	2368346	302250	378714	105394	2.10129e+06	51973.2	863457	75778.5	287048	353528
B+C	C3-0	F	HFHS	14560.7	1372.53	6614.42	45536.5	963.8	1.67219e+06	21316.7	9145.93	1282912	1.92634e+06	496714	8517268	92177.7	2.70132e+06	1.20163e+06	6541.64	92677.7	39152.4	246453	211907	25937	260791	2.44709e+06	7618.36	18984.7	3541.39	48827.7	67110.9	229007	9573.32	2.59414e+06	1.72164e+06	187890	9112467	22277.1	4863.2	2.38538e+06	173416	130079	68611.8	1320710	95264.2	552344	137187	134405	180981
B+C	C5-R	F	HFHS	9099.06	5094.73	68670.5	40976.3	1079.59	2.12489e+06	31892.2	5961.07	2.503e+06	2.13919e+06	671105	14668620	57427.6	999387	483709	4636.78	176254	23276.4	64486.8	150493	34378.3	2.02025e+06	4176064	7717.28	12490.9	4733.24	33163	81653.7	150731	11700.3	3301837	1.74376e+06	292105	12341096	19624.3	2715.89	2.64137e+06	122808	294528	83602.8	1.14576e+06	93520.8	366197	39656.4	271660	184439
B+C	C5-RL	F	HFHS	8444.46	543.48	122743	63031.7	1145.18	1924383	60573.6	17813.4	2.25241e+06	1.78162e+06	847533	10817439	96715.8	2.03791e+06	1.29278e+06	4715.31	150922	64279.2	99331.9	289407	62582.2	1.26978e+06	5.74976e+06	5883.48	17009.7	1799.72	37633.7	165106	334910	19725.2	3.71739e+06	3.78735e+06	133286	6.45885e+06	29313.6	6467.91	2.09441e+06	341233	571603	104152	1.03677e+06	124197	706648	60318	314122	168674
B+C	C5-RR	F	HFHS	18292.8	2460.34	66567	40183.2	0	1001648	35679.8	3925.53	1.29447e+06	2404243	580064	10700203	39512.5	2.30068e+06	779387	4697.25	167361	25325.6	41493.3	200109	24390.7	913291	5743514	3855.91	2534.04	4836.42	13346	488173	130525	5599.52	2.21523e+06	2.03776e+06	302276	3.85349e+06	21431.1	2327.6	2.72788e+06	135882	261497	42920.8	882453	72744.3	603940	35845.5	240564	208517
B+C	C7-0	F	HFHS	7133.51	1818.42	13647.5	19001.5	1342.07	1.84847e+06	33303.3	7133.54	2.55051e+06	2.76172e+06	704788	15181084	64668.7	1.35241e+06	807213	6043.32	151415	25099.7	203857	200051	39880.3	1.59101e+06	4.08418e+06	15989.1	21217.3	3808.61	35063.3	80204.6	128356	9229.13	4.19499e+06	1.35577e+06	126003	13182752	44275.7	5230.41	2.93704e+06	170522	200298	154011	1760211	103337	562188	102874	170651	192060
B+C	C7-L	F	HFHS	12048	15.38	7742.11	40383.9	680.74	1.49549e+06	45071.4	7354.74	2.11254e+06	2760927	630043	7242434	59155.9	1.11187e+06	549921	4516.99	113954	36878.1	82518.7	219003	35378.8	603477	4.07901e+06	7277.74	10089.7	4162.93	27437.9	86960.6	156061	10861.1	2.90673e+06	1.34232e+06	154700	16850328	19205.6	6895.95	3.16422e+06	167058	272863	137275	1.11264e+06	115888	584575	64139.2	203728	202988
B+C	C7-RR	F	HFHS	7536.94	809.49	56118.5	24828.7	806.75	1.53189e+06	47811.1	7040.83	1538788	2652912	563836	11670895	61562.6	3183691	394245	5359.99	144869	30917.2	89080.4	166571	26915.9	516682	3.56772e+06	10913	10785.8	3753.17	16951.6	46791.2	123172	8149.98	3.895e+06	1.12251e+06	163698	9743991	28827.1	3430.92	980600	148708	98163.9	93217.6	1.60106e+06	112573	469118	65537.9	132304	311906
B+R	R2-RL	F	HFHS	9182.9	1590.91	45405.6	38043	1945.46	1.87211e+06	21408.9	6557.53	2.1749e+06	1957890	599652	11789149	84744.9	2.48682e+06	969097	5355.07	170570	42535.3	171108	152680	32210.6	260111	4.65098e+06	4726.08	19532.8	1323.02	35413.2	45098.3	193392	8577.55	4.27651e+06	2.40386e+06	48545.3	11141881	25618.6	4631.19	2.3119e+06	204548	261591	145584	1141232	99809.5	423919	244465	322576	258597
B+R	R3-RR	F	HFHS	4813.43	1109.55	77683.2	22872.2	2367.95	905949	25404.9	4472.98	1.83994e+06	2.24206e+06	523038	8.25219e+06	32243	920523	431147	4494.78	87693.1	23710	98353.4	85006.9	17278.3	228216	3.89102e+06	8375.96	12310.3	2024.86	20098.2	133174	128147	9501.11	2.44818e+06	1.62031e+06	37662.3	7.00845e+06	18715	3566.11	817520	147663	128526	127609	769335	102928	332953	38493.5	203705	189276
B+R	R4-0	F	HFHS	27774.9	3014.66	34489.7	28845.8	0	1.68268e+06	38353.7	9924.53	3834020	2472415	716321	10763869	54092.7	1558174	1475432	7310.34	128096	34591.2	67386.2	161355	34005.2	184088	4608510	7309.17	14480.9	4482.92	51991.5	22735.7	146918	9843.17	2.60065e+06	2.78263e+06	49065.8	5.35531e+06	22259.1	4653.64	2675483	187513	123344	85834.1	772564	89141.9	483041	44796.9	338519	202740
B+R	R4-L	F	HFHS	6344.85	0	44832.5	39489.2	1153.61	1.66326e+06	40365.6	4944.97	2.21661e+06	2.68786e+06	498023	3751021	60765.8	2.17375e+06	799654	6587.82	77354.4	29750.2	156524	176558	24481.8	209062	3.11822e+06	13757.5	18801.9	3824.48	30490.4	206256	140344	5528.65	1.39139e+06	1.20684e+06	277923	10495855	32654.9	6078.9	2.80256e+06	164160	159964	136853	454380	83936.8	479254	131909	96894.6	314122
B+R	R4-RR	F	HFHS	10675.5	359.6	213812	80773	917.17	1.97399e+06	60500.6	18465.6	1.74667e+06	500998	663967	14296227	67923.4	1.80514e+06	1.16014e+06	5775.91	181096	99529.2	129497	500947	69961.9	329858	8034656	18334.5	15662.9	3268.22	22941	253203	417585	30641	4238355	4557502	116473	6.62014e+06	38539.5	11016.1	641208	509996	635601	92729.1	768088	152461	1.17237e+06	63924.2	1041214	197677
B+R	R5-L	F	HFHS	27504.2	2607.47	63210.9	49494.5	10443.8	1.39866e+06	21717	12464.6	3.44546e+06	2.68854e+06	629873	14025063	55174.8	1725285	1.17331e+06	3752.8	156926	28494.4	286800	214362	38056.4	163341	3.9181e+06	5135.83	33048.9	5656.85	53109.5	146016	149279	10694.4	4.15505e+06	2.37046e+06	60814.2	10865237	65846.4	7629.74	2882822	220288	391599	163024	1.04216e+06	113432	525331	100538	181986	300037
B+R	R5-LL	F	HFHS	9914.22	4388.15	109372	56722.1	9758.84	1634325	25558	11928.5	3387656	2.44792e+06	650144	10522418	70129.4	1409258	964048	5338.4	130090	53035.6	305334	238359	45033.6	232687	4.36328e+06	11512.6	27919.5	2212.01	43871	279372	237776	14046	4538284	2.38091e+06	51819.3	11717947	72915.9	4388.55	2.68486e+06	262930	562516	161762	1.07162e+06	92452.2	570681	138263	323633	237671
B	B1-L	M	HFHS	20349.3	757.17	13268.6	28866.6	1092.39	1.18229e+06	30462.9	4263.57	2.47449e+06	2089136	596539	13389176	43280.9	1.27406e+06	763338	7878.65	105486	24671.7	68323	171450	33569.9	265198	3980903	5085.94	23645.7	2110.67	52928.3	42720.4	145872	9923.16	3.60613e+06	1494509	26899.5	4304322	15229.2	2235.94	2.40572e+06	159802	71269.1	80955.1	845145	103886	425681	55482.6	265560	199918
B	B1-RL	M	HFHS	15765.6	770.78	37714.1	34513.2	1320.75	1.20304e+06	32764.5	7301.69	2.7017e+06	2.22438e+06	502575	12528305	35927.1	1.46225e+06	684803	5671.47	136394	30081	56473.3	180168	24233.8	316393	3.4897e+06	3855.38	17904.6	2370.08	25095	51199.4	158924	7389.3	3.82694e+06	734812	30693.9	8397903	24224.9	3220.4	2.34633e+06	163541	80102	79671.3	1.21445e+06	95279.4	487718	30999.5	233331	303727
B	B1-RR	M	HFHS	16372.1	1539.05	15429.9	26142.8	1478.26	1.43529e+06	19585	4430.76	2.72724e+06	2.56145e+06	555044	11473092	57071	1.67172e+06	580328	4923.15	114874	24402.8	95039.5	99758.2	21748.4	469071	3322097	5210.9	21958.4	3842.4	31942.2	90069.9	104615	7148.56	4081229	1.14684e+06	51660.4	7.14535e+06	22501.4	3820.37	2.98503e+06	138736	251333	85894.4	747614	68779.7	290308	59913.9	212383	267272
B	B2-0	M	HFHS	13944.4	1551.76	72293.9	17478.3	0	1.11845e+06	7851.11	5481.85	883109	1.53022e+06	342583	9692225	39530.6	1.30716e+06	727817	6676.63	120121	24779	118253	54175.8	18779.2	200158	2.65672e+06	5810.44	25085.3	2522.57	26095.5	27343.1	64023.5	4651.93	2.70144e+06	700316	45114.9	10006134	26650.2	8423.32	1.49522e+06	141930	300558	68882.3	636695	65482.5	176592	95185.2	113643	216864
B	B2-R	M	HFHS	5881.42	1573.09	50008.6	30037.5	0	1.38476e+06	14930.8	7433.55	2195289	2.77599e+06	640930	12775265	47139	1.07844e+06	958963	4911.68	124917	26215.5	70804.9	95871.4	24289.5	196260	4.23452e+06	9292.81	14404.5	4274.02	38378.1	33824.5	123182	10790.9	3.32832e+06	2.05888e+06	36579.1	6.25145e+06	13107	6360.49	3074131	125416	158118	65965.4	579533	101425	317808	61971.9	294216	195578
B	B5-RL	M	HFHS	5251.66	1700.8	10003	18485	688.45	1.29883e+06	10022.1	1644.4	1.6286e+06	2.75577e+06	388440	6.8166e+06	40755.8	852260	588428	4624.23	64717.2	20028.2	84626.7	74001.9	16665.9	157806	2.87771e+06	13765.9	18653.5	5042.33	29999.5	16496.2	106774	3260.11	2.64248e+06	1.10053e+06	26393.4	8948228	25604.5	2252.2	3.1433e+06	101658	97556.1	59977.5	689961	85166.9	199565	41300.9	167500	177670
B	B5-RR	M	HFHS	8127.8	1374.9	36266.5	20847.8	0	924585	24185.3	5290.41	1.41028e+06	2605515	408624	8.3183e+06	31228.9	1008097	582512	5696.24	94468.9	24527.2	89204.1	81338	17101	206038	2.73803e+06	6827.88	13680.7	4735.69	27388.2	34827.9	95068.7	6258.74	2.46434e+06	1295445	27952.7	5.70014e+06	23945.3	2246.65	2967543	126901	147070	53183	713156	82892.5	195248	64983.7	167641	181680
B	B6-R	M	HFHS	4231.89	1388.32	35007.5	28628.3	0	795073	22800.9	3755.67	1.63157e+06	2.58056e+06	465204	12192736	15587.7	1.10737e+06	454411	4883.06	106575	25612.3	53000.5	121053	17172.3	114896	3.51807e+06	5063.26	15457.5	3579.28	17748.1	48582.1	117529	9333.72	2.96734e+06	1.80601e+06	30823	4860538	21990.8	7196.9	3.20411e+06	129207	160102	57450.1	511624	99510.9	401275	31156	241149	182963
B+C	C1-LL	M	HFHS	6038.94	1479.42	23472	17544.7	0	1417044	23989.6	4478.22	1.73221e+06	1.95479e+06	604041	18785344	54508.6	1.28949e+06	342741	10767.4	169250	26433	68779.5	212214	38299.3	1.16043e+06	4.48952e+06	7852.27	20112.4	3498.64	42023.3	39565.8	118850	12885.9	5850752	1.2482e+06	177384	6.79396e+06	27303.8	4027.39	2.23176e+06	136840	159121	83218.9	1.82267e+06	146935	558930	32710.1	134517	250164
B+C	C1-LLR	M	HFHS	5816.6	1011.27	97753.5	76758.2	1059.6	1895319	52542.6	10472.1	1933647	2.02299e+06	663961	4.47081e+06	60550.1	2.32528e+06	1.15095e+06	4199.13	171012	37694.2	106997	359664	37536.6	693419	4904036	18171.6	13975.2	5415.83	29512.3	131976	217247	15245.8	2318226	2065926	326541	4533142	26653.2	1924.67	2.3152e+06	245879	303410	52733.3	1.05051e+06	88350.2	999401	31823.5	154024	178713
B+C	C1-R	M	HFHS	6648.15	375.24	17280.9	48304.7	1101.4	1525464	19751	14114.3	1465702	1.96261e+06	505498	12074767	74124	3.17297e+06	1.23092e+06	5851.91	159326	41254.6	168889	317678	37425.2	1.10354e+06	3615007	9871.16	10455.6	3396.67	37646.2	71510.4	106561	10279.7	4.0764e+06	1.21678e+06	127955	7.37347e+06	26914.1	2723.42	2.3512e+06	258079	139440	73573.5	1957904	121623	843685	136461	277449	225266
B+C	C3-L	M	HFHS	27849.9	870.36	30176.2	32735	0	1.55315e+06	24263	6156.52	2.39811e+06	2.3029e+06	616650	11930712	37077.5	929557	213960	6268.33	134336	20905.1	160926	192997	19768.5	799312	5.25599e+06	3123.74	13529.3	3889.79	52087.3	248821	134228	5899.35	2.85977e+06	1554540	136938	7101642	22721.2	6177.94	2.70576e+06	129739	173163	63384.6	914830	111401	518063	55796	88787.8	160133
B+C	C3-R	M	HFHS	7086.76	1453.06	27241.3	29564.2	1017.22	1785598	18775.7	8265	1.95275e+06	2293829	701002	8611000	35582.8	887430	905743	5517.39	139627	21764.7	48622.8	176383	29233.8	714125	4.49872e+06	3959.46	12535.3	4961.85	42772.9	96049.9	100936	12295.3	2.13952e+06	2.17079e+06	226743	6.14072e+06	23159	2600.56	2.59285e+06	154398	159847	55259.4	566887	123386	448788	37488.6	182258	139424
B+C	C7-LL	M	HFHS	8027.48	1100.9	16644.6	80387.1	2634.24	1.4607e+06	38990.5	11646.2	5.30624e+06	2.78569e+06	399603	3.85036e+06	53511.7	3953118	880334	2654.54	64316.8	51977.5	153805	365477	54455.5	2.45542e+06	2.4071e+06	17654.5	7700.91	7519.45	17374.9	62651.5	188031	8669.62	1.8503e+06	952127	142688	9077639	52879.2	0	3098456	288701	265002	66818.4	1.27268e+06	76655.6	1.07775e+06	101272	147307	259155
B+C	C7-R	M	HFHS	10638.1	710.35	13108.2	35909.1	1252.09	1.76326e+06	22970.6	4771.04	1.93518e+06	2.41067e+06	605370	10421550	57010.1	2442683	704289	5621.62	120885	30688.3	46550.2	127866	38227.3	664061	4645673	12191.5	14797.4	2949.44	29943.7	41193.2	167501	8983.78	3.50237e+06	1665886	264135	4648733	17334.2	2492.99	2.65217e+06	151854	179727	58505	894846	87087.9	562463	40984.3	271767	234915
B+C	C7-RL	M	HFHS	34613.5	770.25	12979.1	22567.2	1546.7	1261958	21468.7	5758.54	1477042	2.46511e+06	508136	7291998	39462	2043570	363533	3978.32	134984	22844.8	75176.5	110741	22887	692877	3366538	21336.3	7194.11	5079.95	16016.2	17409.6	76453.4	3510.12	2.40179e+06	958023	106000	4.45253e+06	17411.3	2910.5	2317438	106477	135402	43118	776053	102102	341041	39464.6	68110.7	169577
B+R	R2-0	M	HFHS	14653.8	379.16	16683.5	25741.5	1274.06	1.88778e+06	20359.8	11612	3.06565e+06	2.68628e+06	654870	9657420	70851.7	1.47438e+06	979420	6160.08	94108.7	34322.2	152349	158548	32086.7	203806	4.0116e+06	10186.7	24395.3	4949.83	32822	38741.1	148549	13319.4	4.96196e+06	1.67697e+06	47265.2	6848452	24450.9	7164.92	2.26194e+06	239852	241148	92180.7	1.31098e+06	120405	385992	98756.3	348851	218910
B+R	R3-R	M	HFHS	5722.65	587.62	9865.58	29363.2	1313.78	1478221	16954.4	6817.83	3.29763e+06	2.49088e+06	559967	8719132	55247.8	1.172e+06	577904	3059.7	79673.3	30264.2	71292.9	176731	25777.8	253449	3.24248e+06	5021.24	21731	4628.18	30697.8	29249.9	95849.2	8727.22	2.75053e+06	1.46941e+06	61303.4	6.76527e+06	23534.9	1368.84	2.65325e+06	105957	107312	93461.6	633512	121672	504806	71442.4	238621	229281
B+R	R3-RL	M	HFHS	9742.01	1582.88	8907.74	39220.2	4070.6	1.07193e+06	9422.59	13732.8	551987	1764708	234905	6.16592e+06	80548.5	2.41285e+06	665177	3781.33	88651.9	52899.7	204708	150303	35387.9	181956	2.93061e+06	5946.29	16790	5773.94	13251.6	83343.3	162039	7603.66	3090983	1.02681e+06	68361.6	9839237	51508.3	4901.41	2.07073e+06	291137	431004	67805.6	1.49095e+06	81125.1	502538	271371	254807	269584
B+R	R4-RL	M	HFHS	13680.5	250.79	10247.4	21476.2	782.18	1.12964e+06	14922	7493.42	1.08722e+06	2.40188e+06	300959	7.30442e+06	56014.1	1.84995e+06	673473	4393.95	91742	30809.3	73814.1	138230	24564.7	243428	2.45062e+06	5987.51	16336.6	5689.2	16432.9	18924.4	100326	5815.16	2.46579e+06	529494	51452.6	8466386	32492.5	4018.84	2432446	177093	372570	71355.7	1.01932e+06	62421.9	368959	71921	161380	217956
B+R	R4-RRL	M	HFHS	9990.55	0	82789.8	60248.6	0	1.84256e+06	37720.9	12607.5	2.2253e+06	2.9788e+06	771999	10673597	51790	1284086	986727	7226.15	197464	44120.5	109741	317701	43644.9	424651	7249956	10431.4	14030	4037.86	36557	87216.1	302038	21052.1	3.88422e+06	2.95012e+06	45481.4	9621023	37111.5	7385.67	2.20584e+06	271857	286073	151166	986098	145137	738796	71503.7	449477	261326
B+R	R5-0	M	HFHS	7886.81	303.41	14971.5	21958.7	1368.53	1522671	12287.4	6614.26	2785102	2.82852e+06	556477	6.45003e+06	50977.1	1.80507e+06	655739	4684.29	97949.1	30153.8	148968	86442	27049.4	184582	3897147	7401.84	18117	3938.03	28792.8	28509.1	143954	5635.35	3.42667e+06	1.31988e+06	82306.7	9605609	29535.1	2093.59	2899277	175253	108787	120946	986298	70381	257581	121729	283211	257724
B+R	R5-R	M	HFHS	4480.05	2944.53	26347	65507	1662.27	1.78537e+06	27854.5	10335.8	1.25162e+06	2.33638e+06	541268	2.68938e+06	41762.4	5.03348e+06	1.0652e+06	3679.22	71746.9	39362.2	177632	332457	38169.2	363796	3.96752e+06	4146.86	15565.5	6052.68	25696.8	26357.9	211803	16231.2	2.22499e+06	2.17512e+06	171617	6.06953e+06	20028.7	2752.03	1.84201e+06	281832	533762	127992	792617	56845.4	875387	186836	194762	419785
B+R	R5-RL	M	HFHS	14375.2	340.8	3487.26	18894.5	1656.96	1.39615e+06	15512.7	10673.2	2.63683e+06	2.21645e+06	531971	6.99894e+06	58099.1	1130652	761630	3837.52	76847.1	30338.5	130987	126827	25377.9	193933	3.40533e+06	9296.73	16748.2	3336.85	29829.4	26494.8	116844	8832.84	2.89246e+06	1.04192e+06	77374.3	6.26523e+06	22150.8	4684.9	2.36932e+06	147867	115178	79812.5	933140	99492.3	321378	95434.6	201435	204657
[truncated: 40 more columns]

## Sheet: metabolomics2
colonization	mouse	sex	diet	L-ALANINE	ACETOACETATE	3-HYDROXYBUTANOIC ACID	L-SERINE	BENZYL ALCOHOL	URACIL	FUMARATE	L-VALINE	SUCCINATE	PHENYLACETALDEHYDE	NICOTINATE	TAURINE	THYMINE	5-OXO-D-PROLINE	4-METHYL-2-OXO-PENTANOIC ACID	4-HYDROXY-L-PROLINE	CREATINE	LEUCINE	GLUTARATE	L-ORNITHINE	L-ASPARTATE	ADENINE	HYPOXANTHINE	PHENYL ACETATE	SALICYLAMIDE	SALICYLATE	ALPHA-KETOGLUTARIC ACID	ADIPIC ACID	L-GLUTAMINE	L-LYSINE	L-GLUTAMIC ACID	XANTHINE	L-ARABITOL	ALLANTOIN	6-CARBOXYHEXANOATE	DL-5-HYDROXYLYSINE	4-COUMARATE	L-PHENYLALANINE	URATE	2-QUINOLINECARBOXYLIC ACID	N-ACETYL-L-LEUCINE	N-ALPHA-ACETYL-L-ASPARAGINE	L-ARGININE	INDOLE-3-ACETATE	CITRULLINE	FORMYL-L-METHIONYL PEPTIDE
B	B3-R.2	F	SD	111902	16206.4	206594	11950.9	6037.18	979277	12747.3	4694.47	1.4825e+06	275454	143863	5.2056e+06	38367	1550147	343299	33229.5	37448.1	17983.5	702278	48734	22792.9	375592	181202	111809	5130.43	3622.45	139989	69792.3	70902.2	4402.03	1.3497e+06	607733	569490	5.97231e+06	56843.2	8527.24	25341.4	83139.9	92825.3	45987.5	763761	22518.6	137048	10319.5	23904.6	317994
B	B4-L.2	F	SD	47933.4	6192.34	165146	5273	2686.97	946105	8827.53	3597.91	520659	228177	95275.3	4.10861e+06	16772.4	989004	181781	32709.8	15307.8	14414.3	211382	33088.4	12693.8	168224	28314.8	177968	2652.69	2742.3	80113.3	47661.1	41453	1357.75	1216560	135087	451616	7444270	32947.4	9340.74	38813.8	49239.6	106957	34458.9	495086	14267.8	75634.3	10787.8	19711	233300
B	B6-L.2	F	SD	69504.7	3698.86	73633.1	9333.56	4659.29	1.18211e+06	8100.73	4342.95	725416	221612	154074	5191118	26732.8	1.55705e+06	429859	42157.1	25919.1	14857.1	784061	53926.6	11192.2	423871	95455.5	164299	5406.9	5076.69	195233	144891	39665.9	3322.37	1.33866e+06	325760	452407	10096680	145525	9918.69	52696.7	62418.2	257251	32897.4	1.1518e+06	16275.2	75814.2	11037.8	58390.4	283087
B	B6-LL.2	F	SD	74603.4	2091.8	54021.3	5954.45	888.78	1.19785e+06	11991	2663.16	1.2717e+06	200724	165732	5.62254e+06	21093.6	1.06217e+06	239820	55829.9	17869.1	14114.5	105798	58869.5	19360	284499	103190	136142	3745.85	4222.28	138106	27163.5	35467.1	1425.13	1.87937e+06	322208	370903	6720148	34645.6	14884.2	38195.5	44540.8	151194	44566.7	613110	17327.1	100886	8581.39	51274	240815
B	B7-0.2	F	SD	69105.8	7182.51	119414	8984.91	2980.05	1.24183e+06	10518	3035.65	1.13179e+06	241810	133539	5.87787e+06	27017.2	1.88465e+06	464015	43420.7	26659.3	16058.5	405793	57849.4	16947.4	311651	56395	124964	4477.99	4721.58	221229	91574.1	40974.6	1324.59	1.9721e+06	344848	595864	6239430	129842	11228.5	43342.5	52880.8	233773	43255.4	1.0024e+06	8652.04	163030	7440.04	23459	285670
B	B7-RL.2	F	SD	71960.6	5859.56	119338	12326.5	2716.38	861518	9463.92	3934.26	963954	198954	146144	3.03683e+06	19135.6	1503515	229394	35973.3	25454.8	13168.2	409049	64030.9	15110.8	312699	96952.9	92524.7	3004.06	6884.77	138998	48367.2	44646.8	2123.61	1.27073e+06	248674	472188	4029144	54282.2	8917.17	45178	46791.2	91998	42160.5	554268	23945	195776	7690.79	22573.3	260780
B+M	M1-R	F	SD	73778.8	6054.17	130163	7598.67	3908.85	944878	11137.6	2885.75	1.73209e+06	256883	168145	5.22818e+06	26417.1	1.25441e+06	348225	50539.3	23187.2	18363.1	309932	38137.9	13289	284837	119582	141226	6592.83	7677.43	125839	81454.3	75518.6	1909.47	1.6899e+06	456592	1539937	5.76236e+06	35779.3	15850.7	49806.1	75234.1	119862	32306	461063	13472	75263.2	3844.87	28363.4	279177
B+M	M4-0	F	SD	61008.8	252.3	52267.6	9145.82	0	1.39911e+06	9315.2	2409.49	977906	268280	120957	6.15238e+06	21352	794725	358240	33137.8	18511.6	13695.5	304365	47469.7	13466.8	277940	75847.5	183128	2741.57	3459.3	110329	23867.5	48952.8	2134.38	1.46191e+06	324237	577790	4.09714e+06	22884.9	11318.8	47650.4	64279.3	144363	24641.1	519290	18797.3	84412.6	9498.97	45703.9	209457
B+M	M6-LL	F	SD	58947.9	4095.2	255819	8431.23	3815.45	985108	8244.32	3418.95	977661	233954	169993	5.59446e+06	18124.3	1.43379e+06	159347	50207.3	19494.9	14351.5	215564	45163	14753.2	324674	98369.9	122667	2709.22	3752.47	98457.2	29202	44914.7	1248.3	1.42309e+06	282755	494217	8908279	37612.3	11595.4	39642.1	50038	119826	38188.6	664522	14885.5	98888.4	8876.22	36474.3	272517
B+M	M6-LLR	F	SD	148067	23070.8	336096	6677.39	29066.5	1.0452e+06	6961.87	3839.46	1.06691e+06	230741	145687	9397323	22427.8	1.61283e+06	180598	35776.4	49236.8	18927	2.02102e+06	37302.6	12070.7	240654	46086.8	170412	4354.77	6502.38	87723	587467	71291.6	2155.18	1.61669e+06	246028	479117	18075022	590344	13002.6	49561.9	56272.9	216520	40661.7	5.48834e+06	17922.5	71394.1	10514.5	33229.1	320501
B+M	M8-0	F	SD	48442.5	7421.29	28065.8	6234.5	2792.87	711322	8152.62	2564.58	622296	240347	67227.9	4.72485e+06	17570.5	648718	179637	25930.8	15556.7	11960	225732	51635.2	11380.6	216917	57573	136969	3411.99	4729.93	56191.2	20777.2	24576.5	977.08	1249877	159664	400627	6.39176e+06	25987.3	10072	40293.2	57450.5	78000.9	19712.9	635134	19542.7	75660.5	4561.22	55111.3	230417
B+M	M8-R	F	SD	89530.1	4594.77	194664	6574.35	3198.46	733380	7244.03	2960.72	608979	325681	110804	4.132e+06	23190	752318	131989	25148	26753.6	10655.8	286206	36765.2	11447.1	272690	81879.4	135872	2395.23	4496.46	44386.3	23140	26530.3	2198.77	1.03774e+06	184481	481174	6518618	31172.2	7097.28	80198.7	43563.1	64789.2	23940	588657	17668.3	92171.2	3274.44	47271.3	239467
B	B1-RL.2	F	HFHS	211446	1179.34	61263.8	11230	1707.37	390998	9062.73	3448.45	1.45223e+06	66669.5	88492.4	10591545	13336.3	534773	76530.8	2909.4	64286.6	14440.3	226674	33870.6	11402.6	299019	110045	174632	6940.08	4449.05	42424.8	62555	39603.8	2707.23	1.93493e+06	237696	31110.9	3.47543e+06	51304.4	882.84	40428.3	45051.2	74170.5	39070.6	1.14e+06	32741.1	76207.1	4331.49	16109.9	140195
B	B2-L.2	F	HFHS	158477	2590.2	9340.22	11508.6	1083.84	531812	5998.73	2201.55	647676	32237.9	43534.4	13737719	14548.9	454386	59393.6	3195.6	44933.5	13763.7	96990.3	29119.1	13287.7	223321	31044	160779	7829.32	4312.13	37403	18462	30575.3	1954.42	1.73347e+06	100982	22461.2	2888962	23122.5	1111.61	30938	47509.7	48183.1	46717	619783	36553.7	48020.8	21196.1	15934.2	91523.1
B	B2-RL.2	F	HFHS	165632	632.59	2223.33	10410.2	1490.2	310888	10403	2555.83	476254	30718.6	43513.9	12410084	14125	451107	96837.8	3529.6	41389.6	17951	95338	31424.8	10353.5	413501	55300.6	179304	6946.47	2138.59	48064.8	10101.5	35071.5	1255.77	1.51616e+06	36582.2	23246.2	2.87708e+06	17412.9	1022.34	24093.3	51342.6	81885.1	43927.9	573460	33231.4	61993.6	19577	22346.6	111063
B	B5-0.2	F	HFHS	217124	1312.1	54961.9	14464.3	1345.41	328715	10510.1	4140.66	1.09478e+06	17574.9	113290	23471018	15468.4	461612	112410	3979.48	70942.2	17789.6	141985	36821.8	17610.6	309646	100214	181405	7892.27	4994.85	52233.6	56161.4	38060.9	1369.29	2.02688e+06	146174	21944.1	2.23275e+06	36361.1	1102.32	34160.8	43679.8	91922	33782.1	1.00117e+06	34608.6	104726	11453.2	21244.5	127002
B	B8-0.2	F	HFHS	81454.3	3980.84	34621.4	11816.6	1598.31	819990	11101.9	3771.42	1.11478e+06	24635	119810	2963238	22827.4	1588572	211525	1566.5	25480.8	22237.1	121095	55427.6	16652.8	486888	89082.8	149776	7749.58	4270.36	87655	43405.1	54898	2412.76	2029226	363123	49339.8	2.32493e+06	26269.8	0	38003.8	60887.5	123674	28689.7	558397	38274.3	161531	12718.3	20376.3	211590
B	B8-R.2	F	HFHS	153623	1479.44	61418	16911.8	15948.5	527379	8368.42	5953.79	1.26989e+06	21273.4	109256	13664155	16483.8	1.05196e+06	374127	3883.26	44673.7	28984	1.94925e+06	38067.2	15633.3	236497	110365	177488	6527.22	5043.16	88707.4	569629	48756.9	3280.49	2.14027e+06	218403	70585.2	12153963	418211	1201.38	52083.9	59742.8	379491	42052.9	6.04826e+06	58103	109498	19799.2	17489.8	172325
B+M	M2-L	F	HFHS	133642	1148.02	30363.1	10662.7	1702.53	588311	8108.81	3087.78	869537	32326.8	66204.5	11553277	13126.3	846617	136284	7774.73	38841.6	17583.1	87360.2	36870.3	15433.6	283600	49750.3	193981	5908.9	5478.04	48812.2	30737.1	35482.7	2807.42	1.94884e+06	195155	57088.7	4.83623e+06	24115.9	1323.25	26914.6	44332.5	64782.4	40137.7	765214	38560.4	73705.6	14101.7	17869.6	144975
B+M	M3-L	F	HFHS	204350	728.84	27345.4	17949.5	3061.59	502418	10682.4	3348.52	1131121	113018	72952.8	13888655	24083.3	653565	114825	3528.64	56775.8	25890.6	214013	39884.5	17560.7	368765	80548.1	160123	6391.21	6147.52	55984.4	48843.4	47649.3	1455.76	2115256	199717	29708.4	3.90478e+06	34709.9	1180.54	54732.7	62796.4	98237.8	31674.6	1.12783e+06	34001.6	60037.4	10148.9	23492.8	155408
B+M	M3-RRL	F	HFHS	156548	650.39	14307.4	9987.16	979.1	507085	13631.6	5461.25	813567	89241.5	72978.2	13884577	19606.8	750451	135117	1946.21	46014.5	21765.9	131910	32623.1	13934.8	419064	79230.9	201535	6309.7	3880.87	70478.8	41876.1	42270.9	1326.14	2003099	222068	28798.6	2.72332e+06	24714.7	960.97	55115.9	55394.6	84119.7	51147.3	818798	30543.8	77203.2	19124.8	22583	170099
B+M	M5-RL	F	HFHS	104158	2750.81	7219.41	11699	4269.62	622571	5268.24	5560.05	920360	10377	61170.5	9613931	17360.9	625733	112154	1415.32	30564.8	20681.8	258153	27361.1	15235.8	405916	48053.3	193782	8137.21	5923.38	86598.4	55617.2	32031.4	2485.72	2.46741e+06	162550	29457.3	4.04272e+06	41666.8	1611.74	29911	53511.6	86727.9	32465.1	1.31026e+06	44160.9	55883.5	32157.3	21764.6	117965
B+M	M5-RR	F	HFHS	71848.3	2122.96	5447.61	8919.22	1439.82	477234	5652.38	4698.75	786504	14422.2	48499.3	9135923	19099.5	667234	108614	1622.01	23275	18192.3	118359	26542.8	11954.3	334735	49881.5	191050	7050.73	3407.71	77303.5	10473.5	41265.6	2507.61	2.02025e+06	169374	25828.1	2.95828e+06	15768.5	1154.75	41746.9	66694.6	54708.2	48615.1	571337	48626	40848.8	51587.7	19412.4	92360.4
B+M	M9-LL	F	HFHS	168750	1764.78	12235.5	10642.2	1051.71	333718	10218.8	2177.06	825423	55396.4	73729.1	18414528	10235.7	719301	76279.3	5150.09	43616.4	20035.5	81742.3	35011.5	12260.4	235811	67197.3	189722	2969.7	4538.18	40070.1	14265.8	38547.9	2738.52	3.21628e+06	96728.8	27803.5	2547970	22097.6	1808.45	46039.4	53198.3	37200	27211	794241	46317.1	65823.4	19074.4	23395.9	140062
B	B3-L.2	M	SD	73634.1	2773.07	107167	9173.81	1241.81	784580	10720.3	1047.23	1.42122e+06	178720	136872	4.24213e+06	10417.3	1.60889e+06	158576	34090.1	20248.8	8179.53	45207.6	55311.7	11573.7	345092	125147	154743	1736.52	2274.41	103148	34172.9	34387.5	1419.22	1.18149e+06	219020	449978	4.66843e+06	52287.9	7795.15	34170.5	34239.9	108775	29857.3	499795	13664.2	149851	2387.38	28400.6	232452
B	B4-R.2	M	SD	68781.7	4864.74	184068	9168.84	2775.9	1.12128e+06	16781.7	1355.88	991161	299479	109671	6.09971e+06	15834	1.11543e+06	221539	72135.2	19704.4	11745.7	66662.5	60785.8	18676.4	291397	67550.2	142375	6663.72	4189	171729	46364.9	62632.1	3059.76	1.83326e+06	245513	606149	5747668	42941.1	15341.9	34342	45397.6	119429	37704.2	547941	18423.3	154499	3643.42	16619.2	289141
B	B6-0.2	M	SD	77361	3323.1	47508.1	7417.44	2231.32	969969	10044.2	4065.69	962977	249184	142883	6.42428e+06	20381.4	1.22931e+06	280971	61699.4	20651.5	16884.6	267880	58866.8	11537.3	358226	135541	164920	2616.27	3371.35	106956	23977	43704.6	2019.25	2.37082e+06	376179	435393	7783726	49343.2	15981.1	49513.6	71960.5	95358.4	29702.2	867536	17035.1	97640.4	3505.85	63974.3	280557
B	B6-RRL.2	M	SD	98003.9	3774.36	61933.3	10473.7	2158.73	768786	11033.2	3271.75	1.07026e+06	286499	118571	5.94167e+06	25390	1.30999e+06	214184	61637	29617.1	12755.1	187189	39989.5	16508.2	292940	77576.1	190947	3669.89	7564.51	113286	16212	39742.8	4206.88	2.00806e+06	299282	525080	7.53839e+06	61009.6	17595.7	45016.5	46071.4	118958	35786.6	750774	19002.2	98447.5	8260	40990.4	294810
B	B7-L.2	M	SD	83161.7	3639.05	83330.2	5226.26	0	677347	16446.7	3090.69	1.37138e+06	175302	232865	5.15809e+06	10928	1.27444e+06	117723	37489.3	25089.6	9883.21	86280.4	30060.3	10612.3	264366	74399.9	155446	3360.93	2783.16	41283.3	39613.3	38513.2	2410.93	1.42713e+06	221085	240072	3.68153e+06	33670.4	10047.2	29346.1	39444.4	61878.4	18001.5	417945	20099.2	76925.9	1759.25	27577.8	201759
B	B7-RR.2	M	SD	46620.5	4378.78	105603	9515.32	2869.32	1.17865e+06	13486.9	2104.11	1.05404e+06	300896	140291	6.58961e+06	28327.6	2.10145e+06	505966	37812.8	12802.7	14343.6	188151	48410.8	12886.6	343780	103230	157509	4399.13	3536.36	160089	37966.6	45190.2	4036.07	1.47555e+06	446996	461953	5.47049e+06	44973.5	9572.94	50491.9	64369.6	158012	41286	582264	18984	116661	3785.04	21943.7	288443
B+M	M1-0	M	SD	57733.2	1331.31	76048.1	6090.92	0	912004	10713.8	2509.22	1.06207e+06	217633	109862	3.06523e+06	12898.4	452501	163681	28036.2	19389.7	11825.9	86468.2	47445.6	13506.5	281191	99469.8	152170	2726.3	1955.1	104750	38347.1	49986.6	1826.91	1.27031e+06	261001	412270	7248614	27160.1	11532.9	38421.3	42662.6	87576.6	37225.3	361272	15290.8	146023	3282.65	30134	185848
B+M	M1-RR	M	SD	71846.8	3293.56	104681	11457.1	0	1.24566e+06	8611.63	3341.36	1.57163e+06	233584	150179	4.20666e+06	13735.4	1.00543e+06	330025	52245.7	27718.1	16413.1	267996	55879.1	16126.3	309879	64581.2	150506	4782.15	3630.02	131962	24953.6	65363.6	3135.74	1.86101e+06	227976	379336	7.27948e+06	20017.3	15492.6	50532	65424.2	138153	45882.5	531325	12041.6	123143	6920.78	32245.6	283441
B+M	M4-L	M	SD	135378	1618.34	160644	10024.3	1027.18	880412	11923.9	6131.84	1589446	230190	180035	9997967	23854.8	1.53064e+06	244092	45333.2	33436.9	18379.8	73824.2	47440.4	18477.6	274626	106614	182851	3149.72	4255.59	82673.4	31128.4	69861.7	5470	1.82557e+06	223200	399882	4451564	29201.2	14190.5	38635.6	70077.9	74765.2	34255.2	580981	16113.4	126135	5641.03	25730.5	248961
B+M	M6-L	M	SD	81478.1	6282.19	101205	7175.35	1926.85	1.05119e+06	9187.63	3513.85	1.38263e+06	266728	159506	4.88563e+06	16029.6	1.34654e+06	170178	50763.3	22454.5	11969.1	203652	46886.2	13315.9	328676	118263	150097	5661.45	3946.35	87514.4	39740.9	46122.4	1193.28	1.82334e+06	284083	469343	5.71947e+06	53198	13880.7	58745.2	46604.8	105373	37515.1	550622	14716.8	108589	7276.08	36389.7	254620
B+M	M9-L	M	SD	71758.4	2638.66	29673.2	5981.36	1142.12	839874	7857.97	2392.04	634713	269648	119354	3494118	14849.1	1.42497e+06	225696	42602.3	27669.3	12161.3	265138	31392.5	8264.39	222990	41398.6	163214	3940.5	6135.84	89933.6	31168.6	28873.5	1991.88	1.09968e+06	176191	497089	4969467	56110.8	9935.75	66567.7	40136.6	103730	34361.5	736050	12260.3	66074.9	7378.93	31981.5	261347
B+M	M9-R	M	SD	67429.5	4836.34	14252.5	8320.62	6177.29	864090	9596.69	4719.9	1.11028e+06	268392	108457	3671321	19931	1.75923e+06	566541	53799.9	21072.5	22217.9	476002	45558.9	9857.96	256687	34294.1	163551	5087.03	3504.63	204506	50282.3	39899.5	3204.11	1863661	221556	479060	7.88065e+06	69199.1	17571.3	65478.5	86245.1	203181	35362	934162	12614.1	123537	6763.9	18391.6	294493
B	B1-R.2	M	HFHS	167450	3672.57	11693.9	17011.8	2220.82	567100	11153.1	2327.19	1.86877e+06	50736.9	79749.7	12321520	19019.2	1160491	113049	4444.35	50796.8	18775.7	169876	41470.9	28353.4	422897	75118.4	180550	8879.75	3641.61	52004.2	53549.4	51361.7	2666.89	2.86665e+06	144101	40150	5646532	32932.7	1689.93	46467.7	71118.5	71275.5	42138.8	1.07445e+06	46554.1	87245	11425.2	20355.2	172077
B	B1-RR.2	M	HFHS	176642	4569.79	13369.7	8861.81	1750.84	442054	8022.06	3548.12	1.60174e+06	31980.1	110793	10700042	13863.1	1.22436e+06	97377.3	2149.62	48920.8	16605.2	182463	28269.3	14292.9	235896	93498.7	195669	5254.29	3238.14	46569.8	120395	45555.3	1383.07	1.8084e+06	176770	36081.7	3.10436e+06	68202.7	1134.02	24438.1	44004.1	46904.8	19889.6	1.8417e+06	33932.1	56776	12236.8	22892.2	153424
B	B5-RL.2	M	HFHS	146006	3671.78	13094.2	6649.27	1088.29	298270	12908.9	2773.3	689322	17140.3	79206.3	15110113	8632.21	371675	32375.7	4455.8	43202.1	10185.8	56800.8	36801.8	14002.4	265371	86515.1	181589	4848.29	4953.75	19015.7	29618.5	25692.3	1705.97	1.85443e+06	91556.1	24434.3	1.06235e+06	19655.3	581.67	23522.6	29720.6	33746.8	23352.9	526347	43927.8	64932.1	3503.15	15817.6	116116
B	B5-RR.2	M	HFHS	131936	622.34	10224	8213.34	947.87	349192	8396.56	1474.38	792045	13866.9	44264	10335449	13637.6	397558	92536.5	2514.43	35504	12863	94201.8	32933.9	12508.2	293279	105630	186226	9269.63	2433.12	45343.9	22571.8	25004.5	2621.7	1.848e+06	132544	15370.9	1.11206e+06	20531.3	0	22343.7	41474	39228.4	27208.1	518508	40867	69809.5	9430.67	21677.8	121732
B	B8-L.2	M	HFHS	152622	2792.15	36261.3	9294.7	1482.66	384918	8448.71	1800.33	2.6593e+06	17139.6	115739	13934007	13432.8	1.09077e+06	58155.2	2643.12	40482.5	14176.4	163774	30063.6	11289.9	250185	103533	166144	4083.91	6567.1	32533.5	109051	36002.1	1397.37	2.0946e+06	168532	34982.7	3.33413e+06	68618.5	0	22340.3	35701.2	45171.8	17036.1	1.52797e+06	37933.1	58851.8	6746.9	23397.6	156258
B	B8-RR.2	M	HFHS	123094	4213.88	13588.3	15540.3	1293.73	504116	9460.22	5383.44	1.63294e+06	15005	51026	10800153	24380.2	999630	110961	2553.16	41291.1	25640	123132	42429.1	13005.6	268537	50240.5	160932	8807.86	2367.63	46911.8	53237.1	48298	1327.57	2.19286e+06	241498	25149.6	2547556	32000.4	1163.78	22142.1	64446.7	73042.9	20111.2	1.09654e+06	47167.7	107269	15368	12473.8	155657
B+M	M2-RL	M	HFHS	115143	5916.94	12627.1	13837.3	781.1	438844	9445.17	4674.6	1.5907e+06	26113.2	62458.9	9762987	21802.6	556912	104716	3926.27	30289.7	16719.4	164706	35315.4	17954.4	312367	95629.6	170860	5856.94	5509.14	35735.4	43617.9	56552.9	1963.47	2416822	286405	25685.8	2361758	43960.6	0	48367.1	55482	41818.6	29513.2	1.1087e+06	46942.3	80552.6	11485.7	30152.9	105980
B+M	M3-LL	M	HFHS	86807.8	2390.71	27008.3	11253.4	1316.84	493002	9475.84	1474.86	726782	71065.1	56908.8	8.34978e+06	9792.27	491817	98886.2	2482.85	30860.7	14839.3	98053.3	36588.9	14135.4	372346	74273.3	163055	3628.24	4238.76	41061.1	28876.7	36151.6	1801.62	1817619	134921	50086.8	1.48877e+06	25512.4	843.86	89061.9	46391.3	67154	17895.3	795433	43279.9	67205.3	4639.7	19056.9	133422
B+M	M5-0	M	HFHS	123527	1573.66	30034.5	14741.8	2398.09	703092	7688.19	3652.33	1.54229e+06	57556.7	97172.9	9092953	16512.2	363862	73396.8	3796.77	33533.3	17322.5	85283.6	55060.6	20064.7	355352	183875	132686	7761.07	3157	30978.6	37171.1	57735	1043.18	1.87868e+06	250164	42334.9	1.771e+06	20956.5	861.16	45366.3	53895.1	54795.9	22813.4	666613	51374.1	132978	3857.43	29089.4	104909
B+M	M5-R	M	HFHS	102631	2766.2	6539.92	11531.6	2245.89	594939	10872.1	3724.26	1.20711e+06	39005.8	48346.2	7899302	25425.1	735640	112258	2793.11	29808.5	21304.3	282364	34276.9	16989.9	285804	59474.4	180535	9499.1	6363.34	49250.8	84674.1	45528.3	2852.95	2.23391e+06	135481	50276.8	2.50602e+06	56224.2	971.34	43588.9	51778.5	68555.9	26062	1.49817e+06	42665.3	65756.2	15970.2	24326.8	138154
B+M	M7-L	M	HFHS	157785	2415.07	23995.6	15101.2	1812.51	475318	12215.8	1636.33	1.38923e+06	49642.8	123992	13918548	17421	780437	91417.2	3646.85	50580.2	25284.2	136625	55333	13028.8	314752	233575	176483	4683.91	6202.33	35324	73645.5	59065.2	926	2.07851e+06	404860	25618	2896350	47839.8	2015.11	42809	49965.5	59098.2	23474.4	1.25437e+06	50309.3	141500	12766.2	27889.2	148125
B+M	M7-R	M	HFHS	152037	3100.96	12160.4	11772.5	7584.85	583018	6895.55	4142.97	800413	19792.4	61275.3	8459553	21601	960564	88713.1	2882.08	39809.4	22086.1	380908	39203.8	14743.7	268380	50944	202553	11258.3	6459.92	42339.4	184496	52948.4	1973.95	2.40387e+06	126492	29342.9	4.03307e+06	127293	932.14	41422.7	65786.1	66477.9	28397.9	2440551	41020	69372.5	13580	18060	131185
[truncated: 76 more columns]

## Sheet: fecal_lipid
diet	mouse	sex	colonization	plate	mg/dL*mg feces
SD	B3-R	F	B	3	11.54
SD	B3-RR	F	B	3	7.86563
SD	B4-L	F	B	3	13.1681
SD	B6-LL	F	B	3	5.97385
SD	B7-0	F	B	3	9.79585
SD	M1-R	F	B+M	3	16.4602
SD	M4-0	F	B+M	3	11.6619
SD	M6-0	F	B+M	3	11.2255
SD	M6-RL	F	B+M	3	9.52477
SD	M8-RL	F	B+M	3	6.21563
HFHS	B2-R	F	B	3	6.85938
HFHS	B1-RL	F	B	3	10.629
HFHS	B2-RL	F	B	3	5.94832
HFHS	B5-LL	F	B	3	10.9168
HFHS	B8-0	F	B	3	8.84522
HFHS	M2-L	F	B+M	3	7.35872
HFHS	M3-L	F	B+M	3	10.6467
HFHS	M5-L	F	B+M	3	3.68624
HFHS	M5-RR	F	B+M	3	5.84008
HFHS	M9-RL	F	B+M	3	7.87394
SD	B3-L	M	B	3	8.68843
SD	B4-0	M	B	3	9.50159
SD	B6-0	M	B	3	6.06135
SD	B7-L	M	B	3	9.91681
SD	M1-L	M	B+M	3	12.0198
SD	M1-RR	M	B+M	3	6.67733
SD	M4-L	M	B+M	3	3.42523
SD	M6-R	M	B+M	3	7.56084
SD	M9-0	M	B+M	3	7.25303
HFHS	B1-L	M	B	3	7.29221
HFHS	B1-RR	M	B	3	10.6204
HFHS	B5-R	M	B	3	12.6933
HFHS	B5-RR	M	B	3	14.8405
HFHS	B5-RRL	M	B	3	7.97481
HFHS	M2-R	M	B+M	3	5.1848
HFHS	M3-LLR	M	B+M	3	6.99403
HFHS	M5-0	M	B+M	3	4.12637
HFHS	M7-0	M	B+M	3	6.50129
HFHS	M7-R	M	B+M	3	15.339
SD	B3-R	F	B	2	1.81828
SD	B3-0	F	B	2	2.36523
SD	B4-R	F	B	2	2.29549
SD	B4-LL	F	B	2	1.64875
SD	B7-RR	F	B	2	4.52506
HFHS	B5-R	F	B	2	1.69232
HFHS	B5-0	F	B	2	2.28306
HFHS	B8-L	F	B	2	2.58367
HFHS	B8-RL	F	B	2	3.52676
HFHS	B8-LL	F	B	2	4.04273
SD	B3-RR	M	B	2	4.00299
SD	B4-RR	M	B	2	2.44042
SD	B7-RL	M	B	2	4.23054
SD	B9-L	M	B	2	6.21418
HFHS	B2-L	M	B	2	6.14709
HFHS	B2-0	M	B	2	3.09125
HFHS	B6-R	M	B	2	7.47722
HFHS	B1-RL	M	B	2	4.15611
HFHS	B5-RL	M	B	2	3.09358
SD	R6-R	F	B+R	2	9.4955
SD	R6-LL	F	B+R	2	3.36933
SD	R8-0	F	B+R	2	7.207
SD	R6-RR	F	B+R	2	2.05967
SD	R8-L	F	B+R	2	4.90071
HFHS	R2-RL	F	B+R	2	8.49753
HFHS	R4-RR	F	B+R	2	12.0757
HFHS	R5-LL	F	B+R	2	12.4325
HFHS	R4-0	F	B+R	2	3.10388
HFHS	R5-L	F	B+R	2	10.0072
SD	R1-RL	M	B+R	2	6.31508
SD	R8-RL	M	B+R	2	8.035
SD	R6-L	M	B+R	2	9.5786
SD	R7-R	M	B+R	2	3.7345
SD	R7-RL	M	B+R	2	9.59638
HFHS	R3-RL	M	B+R	2	4.90888
HFHS	R2-R	M	B+R	2	4.79439
HFHS	R5-R	M	B+R	2	10.8724
HFHS	R4-RRL	M	B+R	2	10.6555
HFHS	R5-0	M	B+R	2	3.31831
SD	B3-R	F	B	1	8.70148
SD	B3-0	F	B	1	3.1915
SD	B4-R	F	B	1	4.08495
SD	B4-LL	F	B	1	6.12935
SD	B7-RR	F	B	1	9.44101
SD	C2-0	F	B+C	1	2.6301
SD	C2-R	F	B+C	1	2.69225
SD	C2-RR	F	B+C	1	4.7276
SD	C4-R	F	B+C	1	3.16851
SD	C4-L	F	B+C	1	2.9425
HFHS	B5-R	F	B	1	2.66232
HFHS	B5-0	F	B	1	2.24306
HFHS	B8-L	F	B	1	2.84239
HFHS	B8-RL	F	B	1	5.68036
HFHS	B8-LL	F	B	1	3.70348
HFHS	C1-0	F	B+C	1	3.822
HFHS	C1-RRL	F	B+C	1	8.05014
HFHS	C7-RR	F	B+C	1	2.51971
HFHS	C7-0	F	B+C	1	1.81069
HFHS	C5-L	F	B+C	1	4.2698
SD	B3-RR	M	B	1	4.70701
SD	B4-RR	M	B	1	4.63049
SD	B7-RL	M	B	1	5.02643
SD	B9-L	M	B	1	5.18265
SD	C2-RL	M	B+C	1	3.74062
SD	C6-L	M	B+C	1	4.48307
SD	C6-RL	M	B+C	1	3.30802
SD	C4-LL	M	B+C	1	3.46255
SD	C4-0	M	B+C	1	3.88357
HFHS	B2-L	M	B	1	8.99316
HFHS	B2-0	M	B	1	5.01059
HFHS	B5-RL	M	B	1	5.21896
HFHS	B6-R	M	B	1	13.1558
HFHS	B1-RL	M	B	1	9.01454
HFHS	C1-LL	M	B+C	1	5.94186
HFHS	C1-LLR	M	B+C	1	2.94152
HFHS	C3-L	M	B+C	1	4.40495
HFHS	C7-RL	M	B+C	1	10.2161
HFHS	C3-RR	M	B+C	1	7.68509

## Sheet: metabolism
colonization	mouse	sex	diet	AT_total_g	liver_g	heart_g	kidney_g	Chloesterol_Adjust	HDL Cholesterol_Adjust	LDL Cholesterol_Adjust	Triglycerides_Adjust	fat_%	lean_%	fluid_%	BGL_0	BGL_15	BGL_30	BGL_60	BGL_90	BGL_120	BW_3	BW_4	BW_5	BW_6	BW_7	BW_8	BW_9	BW_10	BW_11	BW_12	Ghrelin	GLP-1	Glucagon	IL-6	Leptin	MCP-1	PYY	5-40um_adipocytes	40-70um_adipocytes	>70um_adipocytes	%area_liver_lipids
B	B3-0	F	SD	0.3622	0.7025	0.0723	0.0895	1.52	1.12	0.2	0.46	17.03	68.73	8.51	6.7	11.3	9.1	6.2	5.4	5.9	7	13	17	17	17	19	19	20	21	20	17.4884	1.44525	38.717	30.1263	2665.16	16.3038	173.272	99.8257	0.174268	0	0.23925
B	B3-L	F	SD	0.3485	0.8097	0.0683	0.0741					20.41	67.2	8.55	5.9	14.4	9.3	8.6	7.1	6.5	7	12	16	16	18	19	19	20	20	20	18.5445	2.40344	20.2471	43.4911	2149.31	36.6256	109.536	50.0678	38.2984	11.6338	0.82825
B	B3-R	F	SD	0.3065	0.5707	0.0824	0.1002	1.515	1.11	0.135	0.585	17.14	68.49	8.27	8.3	13.2	7.7	8.3	8.1	5.6	6	13	16	16	17	19	20	20	20	21	33.4019	1.93488	54.2141	15.5554	1981.53	17.8301	170.358				0.084
B	B3-RL	F	SD	0.3196	0.7688	0.0801	0.076	1.41	1.095	0.075	0.51	17.39	68.14	8.51	7.8	12.6	10.2	8.8	7.6	7.5	7	13	17	17	18	19	20	20	20	21	40.7325	3.82413	58.1362	11.9065	2032.28	19.7355	212.468	43.5114	42.9508	13.5378
B	B4-0	F	SD	0.1535	0.9191	0.0683	0.081	2.1	0.37	1.45	0.61	10.39	73.33	8.72	6.2	10.1	9.8	7.1	6.6	6.8	5	10	14	16	16	17	18	18	18	20	180.228	2.26789	29.9426	22.114	466.523	47.3516	168.489				0.06875
B	B4-LL	F	SD	0.2393	0.7238	0.0616	0.0638	1.59	1.185	0.15	0.57	15.98	70.9	8.7	6.7	15	9.7	6.3	5.9	6.8	5	10	14	14	16	16	18	18	18	19	305.944	3.13675	28.6666	12.5947	2590.79	14.0358	244.996	68.6781	29.1091	2.21281	0.0785
B	B4-R	F	SD	0.2193	0.7459	0.0746	0.0768	1.56	1.224	0.12	0.492	14.87	68.91	8.84	7.1	13	11.2	7.8	7.2	6.4	5	11	16	15	17	17	18	18	19	20	31.2537	1.94917	20.7215	9.62127	1866.18	11.6946	154.898
B	B4-RL	F	SD	0.2897	0.8469	0.077	0.0723	1.41	0.21	0.915	0.645	16.73	69.74	8.2	6.8	16.2	12.1	8.7	8.3	6.4	5	9	15	15	16	17	20	19	19	20	0	4.72315	18.8793	43.7778	1378.37	56.934	154.813				0.136
B	B7-R	F	SD	0.2699	0.7875	0.0756	0.0602	1.16	0.84	0.13	0.42	15.94	69.54	7.97	8.4	13.2	12.2	9.4	8.4	8	5	12	16	16	17	18	19	20	20	20	0	2.10574	11.4441	31.8835	1859.82	12.9701	129.315				0.07275
B	B7-RR	F	SD	0.3469	0.8057	0.0686	0.0809					21.47	65.71	8.02	6.2	13.8	13.4	7.6	5.8	6.6	6	11	16	16	17	18	18	19	20	20	69.3021	5.69692	14.7048	77.38	3027.8	44.6877	109.721				0.05325
B+C	C2-0	F	SD	0.2454	0.815	0.0608	0.0854	1.66	1.39	0.04	0.51	16.87	69.69	8.79	8.3	13.4	9.1	9.3	8.6	9.5	5	10	15	16	16	17	18	18	19	19	51.7376	3.16457	39.6212	15.7187	797.336	17.2118	226.447				0.05325
B+C	C2-L	F	SD	0.195	0.7493	0.0735	0.0518		0.35			14.48	70.03	8.14	9.6	14.9	8.8	9.6	7.7	6.6	5	9	13	15	17	17	17	18	19	19	30.8295	2.95953	42.7059	33.4898	883.501	29.453	209.772	61.2291	33.9466	4.82431	0.0475
B+C	C2-R	F	SD	1.2821	0.8105	0.0721	0.0864					15.58	69.51	8.43	9.3	19.4	13.8	10.6	10.7	8.3	6	10	15	16	17	18	18	19	20	20	45.6942	5.57367	40.7836	26.419	1669.18	30.4162	182.317	86.6281	13.3083	0.0636132	0.026
B+C	C2-RR	F	SD	0.2183	0.7193	0.0585	0.0654	1.71	0.26	1.23	0.48	14.44	71.95	8.29	5.7	14.9	13.1	7.4	8.1	8.1	5	9	15	16	17	17	19	18	19	19	37.9423	4.59003	39.8536	16.7868	924.091	21.7606	228.265				0.1135
B+C	C4-L	F	SD	0.2405	0.7969	0.0857	0.087	1.65	1.33	0.14	0.4	14.27	71.02	9.06	7.4	10.4	8.6	8.3	6.7	5.6	5	11	15	15	16	17	18	18	18	19	16.1687	1.43676	12.1005	31.1416	561.65	15.2171	118.954	51.3322	44.2758	4.39196	0.1345
B+C	C4-R	F	SD	0.1962	0.7661	0.0683	0.0702	1.57	1.26	0.13	0.4	12.55	72.91	8.96	7.6	19.4	9.7	8.3	8	6.2	6	10	13	14	15	16	16	17	17	18	9.43185	1.54318	13.6019	12.4736	404.793	17.301	148.744				0.217
B+C	C4-RL	F	SD	0.2121	0.6731	0.0539	0.0703	1.17	0.97	0.07	0.3	12.39	73.47	8.14	6.6	14.5	8.7	8.1	7.4	9.2	5	10	14	14	15	16	17	17	18	18	0	1.03706	11.3395	17.2247	774.256	16.3872	124.611	70.1431	28.6334	1.22357	0.16
B+C	C6-0	F	SD	0.1777	0.6499	0.0955	0.0648	1.29	0.9	0.21	0.4	11.4	73.88	7.47	6.6	11.6	14.6	9.5	12.4	8.9	5	9	13	15	16	16	17	17	18	19	45.0995	2.66229	34.6434	103.593	1020.44	21.4572	259.818	63.3694	33.7867	2.84386	0.051
B+R	R6-0	F	SD	0.3443	0.8486	0.07	0.0951	1.41	0.825	0.36	0.48	24.04	65.03	8.56	7	16.4	12.1	6.7	5.5	5.9	6	12	16	16	17	19	19	20	20	22	0	8.56844	18.0961	29.8489	5446.7	41.315	164.897	56.8281	34.8845	8.28743	0.0315
B+R	R6-LL	F	SD	0.2478	0.6615	0.0475	0.063	1.725	0.45	1.035	0.54	17.32	70.51	8.3	6.7	13.6	10.5	8.1	7.2	6.3	4	10	15	15	16	18	18	18	18	19	0	5.64862	27.7117	30.4081	1873.32	35.6806	131.049				0.027
B+R	R6-R	F	SD	0.4455	0.7675	0.0798	0.0803					25.34	64.74	8.69	6.7	13.8	11.3	8.6	6.2	8.2	6	11	14	16	17	17	18	18	19	20	0	1.53728	20.4172	29.7569	7502.13	14.9669	149.891	57.8137	32.3368	9.84959	0.0315
B+R	R6-RL	F	SD	0.2704	0.7744	0.0768	0.0869	1.836	1.608	0.012	0.468	16.02	70.89	8.93	9.3	11.9	16.7	7.3	7.9	5.9	5	11	15	16	17	17	18	19	19	20	35.4672	1.33303	19.5182	16.3986	1433.19	18.1102	115.728				0.068
B+R	R6-RR	F	SD	0.4391	0.7651	0.0755	0.0675	1.84	0.54	0.98	0.72	23.53	64.39	8.45	6.6	17.1	9.6	8	7.6	5.9	6	12	16	17	17	18	19	20	20	20	42.2364	2.44933	24.8474	64.8779	4510.85	30.0116	95.0867	49.0928	36.445	14.4622	0.07675
B+R	R8-0	F	SD	0.5951	0.9057	0.0946	0.1005	2.08	0.28	1.1	1.54	27.83	63.95	8.95	6.5	12.7	9.4	7.6	8.1	6.9	6	11	16	17	18	18	18	21	22	22	0	1.91622	16.5119	33.1821	5484.12	43.1053	116.703	47.8511	31.0454	21.1035	0.07925
B+R	R8-L	F	SD	0.5074	0.9482	0.0835	0.0963	1.98	1.44		0.6	26.61	64.37	8.09	6.3	15.1	9.6	8.8	7	7.2	6	10	15	17	18	19	19	21	22	22	0	1.81832	13.191	58.2011	7957.94	22.4724	125.474	47.9473	32.3107	19.7421	0.12225
B+R	R8-LL	F	SD	0.6721	0.9139	0.063	0.0962	1.78	0.9	0.56	0.7	29.1	63.08	8.76	6.6	16.7	12.8	7.7	8.5	7	6	10	15	16	17	18	19	21	22	23	19.5622	1.5232	14.2626	49.7078	5399.71	33.3375	157.574				0.111
B	B3-RR	M	SD	1.7695	0.9967	0.0858	0.1045	2.31	1.995		0.705	28.89	60.86	8.27	9.4	15.8	11.9	7	8.1	8.2	7	14	19	21	22	23	24	25	25	26	17.4884	2.29382	18.9497	35.5382	7279.55	13.656	164.119	46.1202	27.5558	26.324	0.0735
B	B4-L	M	SD	0.413	0.9028	0.0955	0.1046	2.31	1.785	0.12	0.885	22.47	65.22	7.65	9.9	15.7	10.6	7.8	7.1	7.9	5	11	18	19	20	21	22	23	24	25	18.6995	2.89378	13.3784	36.7424	6283.03	18.1391	132.333				0.02475
B	B4-LLR	M	SD	0.3433	0.9572	0.0888	0.116	1.716	1.392	0.036	0.636	18.02	68.13	7.82	8.7	21.1	16.5	10.4	9	9.4	5	11	17	18	19	20	21	22	22	23	0	2.5717	14.8308	26.0593	3295.67	14.9451	151.1	63.1518	31.1924	5.65577
B	B4-RR	M	SD	0.7082	1.0627	0.0985	0.0983					26.58	63.4	7.81	7.1	16.5	13.2	7.6	8.1	8.3	5	12	18	19	21	22	23	25	26	26	0	2.23815	9.9597	41.0439	4526.11	28.2977	95.9734				0.09325
B	B4-RRL	M	SD	0.2316	0.7669	0.08	0.0818					9.18	74.05	7.43	4.7	11.1	11.6	7.1	5.5	5.7	5	8	15	17	20	20	20	21	22	23	24.4512	3.05795	16.33	61.8574	482.761	19.7579	177.212	71.172	27.1468	1.68127	0.07625
B	B7-0	M	SD	0.5033	0.9401	0.0767	0.124	2.85	1.2		1.5	22.28	66.36	7.68	5.3	16.7	10.6	7.4	7.8	5.6	7	13	19	20	21	21	23	23	25	26	16.6402	3.80714	7.83431	35.8267	2561.95	53.6506	81.1369	56.6657	36.1533	7.18109	0.0525
B	B7-L	M	SD	0.2529	0.7785	0.092	0.1073					13.41	71.17	7.62	7.3	12.7	14.2	8.7	7.3	6.8	5	10	16	18	20	21	21	21	23	22	0	2.24118	11.7145	59.5988	1420.71	13.3834	128.094
B	B7-RL	M	SD	0.4998	1.0622	0.0791	0.12					19.47	67.16	7.74	6.1	13.7	13.3	7.2	5.6	7.9	7	13	19	20	21	22	22	23	25	25	24.0769	2.85303	12.34	56.2541	2637.93	34.267	112.704				0.0455
B	B9-0	M	SD	0.894	1.0563	0.0961	0.1213	1.464	1.128	0.048	0.636	26.01	64.11	8.03	6.3	12.1	11.7	9.8	8.2	8.6	8	15	20	22	23	24	25	27	26	29	24.6508	1.8653	8.72904	27.6775	5298.21	27.7909	89.7357	42.944	39.0291	18.0269
B	B9-L	M	SD	0.459	0.8728	0.0936	0.1185	2.38	1.99	0.16	0.5	14.22	70.79	7.42	7.3	17.3	13.4	8.2	9.6	7.5	6	13	17	19	20	22	23	24	24	25	26.2019	4.5848	17.5276	43.3919	2882.06	22.1908	131.704	56.2435	40.0905	3.66596	0.02925
B	B9-R	M	SD	0.3185	0.8861	0.0975	0.1199	1.98	1.57	0.15	0.57	17.58	67.91	7.98	5.6	17.2	12.3	9	7.9	6.2	7	11	19	20	21	21	22	23	23	24	0	4.6998	16.8433	39.091	1437.11	23.2031	127.425	55.1942	39.6981	5.10775	0.03925
B+C	C2-RL	M	SD	0.3227	0.8524	0.0864	0.1129	1.26	1.095		0.45	15.21	70.34	7.07	7.5	19.1	15.5		9.6	6.1	4	11	15	17	19	21	21	21	22	23	0	2.97354	24.8938	25.5043	1094.66	18.5467	225.12	73.6425	24.4527	1.90476	0.0705
B+C	C4-0	M	SD	0.2656	0.8375	0.0812	0.0886	1.53	1.2	0.09	0.525	14.44	70.88	7.53	5.9	16.2	11.5	7.6	5.3	5.6	4	10	15	17	19	20	20	21	21	22	0	1.77645	11.078	21.7731	2220.07	15.2194	127.166	60.839	35.0759	4.08507	0.149333
B+C	C4-LL	M	SD	0.2955	0.8115	0.0552	0.0751	1.68	1.36	0.15	0.37	14.68	70.59	7.54	9.2	19.5	9.7	8.7	6.3	6.6	5	9	14	16	18	19	19	20	20	21	0	1.52711	9.32523	20.8497	941.833	19.5716	98.2999	63.5043	33.5504	2.94538	0.247
B+C	C4-LLR	M	SD	0.3599	0.8411	0.0542	0.0962	1.5	1.2	0.06	0.57	14.63	71.82	8.04	7.9	15.4	13.6	7.1	7.3	7.1	5	9	15	17	18	19	19	20	20	21	0	1.06775	12.2622	45.9391	1724.23	15.6896	117.325				0.24825
B+C	C4-RR	M	SD	0.2874	0.7879	0.0836	0.0855	1.29	1.11	0.015	0.36	13.21	72.25	7.43	6.5	20.7	11.3	7.5	7	6.9	5	8	14	16	17	19	19	19	19	21	0	1.11537	8.14507	15.7094	726.212	12.5789	99.9606	71.113	28.3078	0.579242	0.341
B+C	C6-L	M	SD	0.4001	1.0315	0.0956	0.1023	1.3	1.13		0.37	16.72	69.95	7.53	5.5	13.4	10.2	7.5	7	6.3	6	10	16	19	20	21	22	22	23	23	0	2.21779	14.9175	47.0842	1628.83	18.5441	131.526	51.6653	39.5467	8.78802	0.08725
B+C	C6-R	M	SD	0.324	0.8204	0.0867	0.1075	1.95	1.66	0.07	0.48	15.25	70.37	7.36	7.2	13.4	10.6	8.8	9.7	10.2	5	11	17	18	19	20	22	22	23	22	0	2.09494	18.0288	38.4846	2018.98	15.8782	164.787	53.0098	44.335	2.65525	0.047
B+C	C6-RL	M	SD	0.3782	0.8979	0.0566	0.123	1.74	1.47	0.03	0.54	14.68	71.26	7.26	6.4	15.6	11.6	8	6.6	7.8	6	9	16	18	19	20	22	22	23	23	0	2.28721	16.0591	40.9884	1513.13	22.6972	141.919				0.036
B+R	R1-RL	M	SD	0.5788	0.9867	0.0891	0.1256					22.38	65.79	7.76	7.8	15.4	10.7	10.6	12.9	6.5	6	11	18	20	22	23	24	24	25	27	6.36046	4.8626	28.279	16.5866	17460	48.8664	142.858	50.9753	40.6585	8.36615	0.065
B+R	R1-RR	M	SD	0.4375	0.9659	0.079	0.1144	2.55	2.1	0.21	0.54	18.92	67.1	7.35	8.2	13	13.5	10.2	9.9	7.2	6	12	19	20	22	23	24	24	25	25	0.268247	2.81146	14.9772	9.37601	3471.78	10.4644	153.161	57.8863	32.6809	9.43281	0.04975
B+R	R6-L	M	SD	0.6556	0.8165	0.0776	0.0972	1.86	0.33	1.34	0.41	20.94	66.25	7.62	7.9	15.6	16.9	16.6	11.8	10.9	6	12	18	19	20	22	22	23	23	24	141.46	1.78882	18.3471	87.6272	3291.51	48.3778	168.989				0.0635
B+R	R7-0	M	SD	0.775	1.0948	0.0894	0.1213					25.87	63.14	8.06	6.5	12.7	10.8	9.2	8.6	6.8	6	13	19	21	23	24	25	25	28	27	0	6.62396	10.647	65.1963	5723.29	46.6658	115.917	44.8396	41.7194	13.4411	0.01475
B+R	R7-L	M	SD	0.677	0.9177	0.0975	0.1015	2.15	1.79	0.14	0.49	27.42	62.4	8.54	6.4	13.4	11.5	7.6	8.3	6.6	6	13	19	20	22	22	24	25	26	26	0	2.66983	17.0085	72.1748	6645.16	16.1306	119.879	38.4766	26.9467	34.5767	-
B+R	R7-R	M	SD	0.8901	1.0426	0.0899	0.1098	2.268	1.86	0.144	0.576	31.18	60.22	8.03	7.8	11.7	13.4	11.7	9.1	7.9	6	13	19	21	23	23	25	26	27	27	0	2.77907	15.5401	78.682	9729.41	19.1249	93.1188				0.03875
B+R	R7-RL	M	SD	0.5538	1.0241	0.0885	0.1461	1.88	1.52		1	23.71	64.53	8.08	7.1	13.6	12.6	10	7.4	8.2	7	13	19	21	22	23	24	25	26	26	0	4.16293	19.99	52.4756	4549.2	23.6052	136.303	43.4604	30.1414	26.3982	0.02275
B+R	R7-RR	M	SD	0.3863	0.9068	0.0616	0.0726	1.44	1.17	0	0.57	20.5	67.42	7.47	8.3	14	15.7	7.8	6.9	8.1	6	13	19	20	22	23	23	23	25	25	48.7938	2.05685	10.6279	44.089	3927.39	33.1093	134.674	47.5274	37.6629	14.8097
B+R	R8-R	M	SD	0.6812	0.9975	0.0747	0.1081	2.11	1.79	0.09	0.5	20.11	66.82	7.89	7.2	12.8	9.9	8.2	7.2	6.9	6	12	18	20	20	21	22	23	23	25	0	2.75926	17.6137	45.3391	4111.82	20.8999	195.194	36.157	49.6014	14.2416	0.369
B+R	R8-RL	M	SD	0.5433	1.0507	0.0952	0.1088	2.07	1.68	0.04	0.78	23.83	64.77	7.34	7.3	10.1	12.7	8.6	7.1	6.6	7	13	18	20	21	21	23	24	24	26	0	1.32475	11.0007	46.8507	4898.34	24.0275	102.576	54.0432	40.5656	5.39123	0.07225
B	B1-LL	F	HFHS	0.7003	1.169	0.0911	0.1211	2.38	1.74	0.44	0.44	28.35	61.99	8.28	10	14.2	8.4	7.6	8.1	8.8	7	12	17	18	19	17	20	23	24	24	12.9978	4.35665	14.5581	29.328	6380.4	7.4386	181.076				0.44275
B	B1-R	F	HFHS	0.6707	1.0376	0.104	0.1108	2.325	1.635	0.39	0.675	27.11	63.54	8.15	7.8	14.3	12	8.7	9.4	6.4	6	10	16	17	17	20	21	21	23	24	0	5.73384	16.1805	17.3845	5682.86	14.2221	193.41	38.8953	31.0574	30.0472	0.7725
B	B2-RL	F	HFHS	0.7161	0.8648	0.0583	0.099					28.77	64.72	7.82	9.1	24.7	15.1	11.6	12.5	9.2	6	11	16	17	18	19	21	21	22	24	50.8066	3.4739	26.8901	33.6349	6669.15	19.3414	156.555	62.8725	29.376	7.75153	0.2725
B	B5-0	F	HFHS	0.4047	0.8614	0.0857	0.0947	2.33	0.91	1.23	0.41	18.47	70.96	7.07	6.9	12.8	9.6	7.1	6.6	5.6	6	10	16	17	18	19	21	21	21	21	132.001	2.69296	17.2463	11.8972	3447.07	14.9397	166.503				0.3145
B	B5-L	F	HFHS	0.6234	0.828	0.1131	0.1065	3.06	2.44	0.42	0.44	24.97	66.06	7.24	7.8	13.6	11.1	6.3	6	5.6	6	10	16	17	18	19	21	22	23	23	0	1.75332	19.7595	31.6865	4973.32	21.6263	99.9046				0.43725
B	B5-R	F	HFHS	0.466	0.8043	0.0726	0.0979	2.895	2.34	0.345	0.45	22.26	67.59	7.74	7.2	13.8	10.4	7.1	7.4	6.2	6	12	17	17	18	16	20	22	22	23	52.0748	1.77462	19.8928	8.61326	5015.5	18.2465	94.9662
B	B6-0	F	HFHS	0.8633	0.8927	0.0843	0.1132	1.944	1.632	0.108	0.444	37.68	58.38	8.26	7.4	12.4	15.7	12.8	12.4	13.8	6	11	16	17	19	19	21	23	24	26	9.17328	2.18312	11.8092	42.5652	11338.9	14.9763	112.79	53.2509	19.2158	27.5332	0.49025
B	B8-L	F	HFHS	0.8612	0.9792	0.0883	0.0979					36.45	59.48	8.39	6.8	12.9	10.4	8.3	8.6	7.9	6	10	16	17	19	21	22	24	24	26	0	1.78583	12.6632	50.1734	6814.25	25.2313	126.926	43.5915	39.6846	16.724	1.0975
B	B8-LL	F	HFHS	0.4909	0.7835	0.0779	0.0895	2.2	1.78	0.23	0.43	24.14	68.36	7.76	7.4	19.4	11.9	9.2	6.7	6.2	5	9	14	15	17	18	19	19	20	21	0	2.07884	19.9239	59.9436	5433.4	21.679	141.975	50.0186	31.9424	18.039	-
B	B8-R	F	HFHS	0.6643	0.9064	0.0881	0.1176					38.54	58.21	8.29	7.6	14.7	9.7	6.9	6.6	5.9	6	10	16	17	18	20	22	22	24	25	0	2.00442	13.1128	66.7954	7756.32	30.1113	83.98	31.6982	31.1326	37.1692	0.762
B	B8-RL	F	HFHS	0.7824	0.8928	0.063	0.0865	2.46	1.956	0.3	0.432	35.81	60.15	8.3	6.7	12.3	10.1	8.9	7.6	6.5	5	10	14	16	17	18	20	20	22	23	0	1.41236	18.1983	59.354	7494.5	27.9222	104.876	39.8668	25.4901	34.6431	0.2745
B+C	C1-0	F	HFHS		0.6667	0.0451	0.087					18.74	71.24	6.83	7.2	14.2	9.2	5.3	5.2	4.9	5	8	13	14	14	14	15	16	16	16	23.7216	3.09194	22.2952	12.5186	1458.07	11.3341	110.871				0.32425
B+C	C1-RL	F	HFHS		0.6626	0.0641	0.0867	2.175	1.515	0.465	0.435	11.57	75.16	6.96	6.6	17.3	12.1	6.1	5.2	4.7	4	8	12	15	15	16	16	17	17	16	65.1279	1.71995	9.81296	8.80035	374.765	17.4258	154.671				0.04625
B+C	C1-RRL	F	HFHS	0.0473	0.6013	0.0349	0.0871	2.64	2.1	0.36	0.39	7.55	75.9	4.54	8.7	20.6	8	6.3	5.2	6.3	4	7	11	13	13	15	15	14	14	13	35.9046	2.778	13.3551	14.3565	44.7684	5.79215	158.422
B+C	C3-0	F	HFHS	0.2936	0.737	0.0701	0.0854	1.36	1.06	0.12	0.38	18.28	70.74	7.15	9.2	19.2	12.9	6.9	6.1	6.8	6	9	14	16	16	16	16	17	17	17	0	1.12087	15.8877	60.5055	1403.92	13.7102	148.057				0.26675
B+C	C3-RL	F	HFHS	0.2947	0.7008	0.0626	0.0919	2.22	1.86		0.6	20.88	68.15	5.79	7.7	15.9	12.4	6.2	6.8	4.9	5	9	14	15	15	16	16	16	16	16	0	1.51037	14.7133	21.5953	2157.84	11.6314	88.1915
B+C	C5-L	F	HFHS	0.2544	0.6702	0.0721	0.0779					16.23	71.42	6.35	6.9	19.4	23.2	11.1	8.2	5.8	6	9	14	15	16	16	17	17	16	16	0	1.50512	15.6924	57.0088	1195.47	26.4712	144.45	40.513	45.7484	13.7386
B+C	C5-R	F	HFHS	0.4543	0.6666	0.0772	0.0966					15.26	74.26	6.87	6.1	23.6	9.4	6.2	6.7	6.6	6	9	14	15	16	16	17	18	19	18	33.1146	7.81123	25.2786	42.5469	1081.77	42.5077	167.656	38.5131	46.2669	15.22	0.05225
B+C	C5-RL	F	HFHS	0.3037	0.6659	0.0694	0.083	1.52	1.28	0.08	0.32	19.81	69.13	6.76	7.4	21.7	9.8	7.4	6.1	7.9	6	9	14	15	15	16	18	18	17	17	0	1.01761	10.0052	61.9559	1674.96	19.9189	105.103				0.118
B+C	C5-RR	F	HFHS	0.2643	0.5789	0.0607	0.0591	2.472	2.076	0.144	0.552	23.46	68.31	5.97	7.1	14.4	13.5	7.4	7.6	6.5	6	10	13	14	15	15	15	15	16	15	0	1.35605	12.4826	7.91276	2037.07	14.2313	115.792	49.0043	43.4428	7.55284
B+C	C7-0	F	HFHS	0.2273	0.6175	0.0418	0.0419	1.33	0.33	0.88	0.27	16.93	72.51	7.18	6.5	19.6	14.2	8.9	7.7	6.3	5	8	13	15	15	15	16	16	16	16	0	1.49081	21.2201	36.8246	1638.51	28.22	133.556
B+C	C7-L	F	HFHS	0.2802	0.7034	0.0716	0.0771					14.23	74.64	7.67	6.9	16.7	10.4	7.3	6.2	6.6	5	8	13	15	15	16	17	17	17	17	323.418	1.94531	20.8501	29.9245	631.765	16.6176	115.668	52.3495	41.4625	6.18796	0.05725
B+C	C7-RR	F	HFHS	0.2041	0.7264	0.0767	0.0745	1.6	1.25	0.19	0.35	11.03	77.82	7.84	7.2	18.6	9.1	5.7	6.5	5.9	5	9	13	16	16	17	17	17	18	18	74.2727	1.94045	26.7212	66.5649	559.858	20.8097	106.852				0.05375
B+R	R2-RL	F	HFHS	0.8241	1.0273	0.0871	0.1171	2.12	0.54	1.29	0.65	32.66	61.69	8.56	9.7	22.2	14.1	11.8	13.3	11.6	7	13	18	18	19	19	20	21	23	25	69.0735	3.12998	31.2649	28.0241	9547.56	28.3427	250.588	69.416	15.3046	15.2794
B+R	R3-RR	F	HFHS	0.9927	1.0529	0.0901	0.1282	2.59	0.44	1.86	0.62	36.58	57.72	8.38	13.1	20.3	13.5	11.5	9.4	11.1	6	12	17	18	19	20	21	23	25	26	162.2	2.89168	39.3028	29.6221	7542.02	36.5912	160.017	65.3017	13.4307	21.2675	1.00325
B+R	R4-0	F	HFHS	0.5794	0.8371	0.0791	0.0878		0.45			26.77	64.7	8.5	10.3	15.7	10.6	10.3	7.1	6.8	4	10	14	16	18	18	19	20	20	22	9.32152	2.00443	15.0073	26.4759	4357.27	37.8177	63.0844	50.2159	34.1569	15.6272	0.85575
B+R	R4-L	F	HFHS	0.461	0.8717	0.0807	0.101	2.25	0.36	1.485	0.915	18.19	71.13	7.83	11.8	18.7	15.3	11.3	8.7	9.4	5	8	15	16	17	18	19	21	20	21	177.936	3.49102	12.8318	64.698	2258.64	38.4146	110.023				0.23325
B+R	R4-RR	F	HFHS	0.4994	0.8598	0.0838	0.0747		0.39			24.17	65.77	7.7	9.9	17.2	13.9	13.7	11.5	8.7	5	9	14	15	16	18	19	20	20	21	18.4544	2.96512	17.8056	67.1282	3837.98	27.5655	126.356				1.1525
B+R	R5-L	F	HFHS	0.8857	0.8355	0.0646	0.1167	1.84	1.54	0.13	0.38	36.26	58.3	8.26	8.9	19.7	18.1	10.8	8.3	9.1	6	11	17	18	18	20	20	23	24	25	0	1.4213	10.3613	12.7409	8235.86	18.9984	94.3476				1.16525
B+R	R5-LL	F	HFHS	0.9455	0.9142	0.0813	0.1092	2.01	1.71	0.03	0.6	34.68	58.76	7.95	10.7	15.8	13.7	9.8	8.8	9.5	5	11	15	16	17	18	20	21	22	23	0	2.71164	13.7105	39.9946	8880.25	29.1791	128.11				0.377
B	B1-L	M	HFHS	1.1562	1.2265	0.1173	0.1242	3.75	2.46	0.84	1.02	38.02	55.93	8.37	9.1	23.6	22.3	10.8	10.3	8.4	8	12	19	20	22	23	24	27	29	30	0	2.36597	13.2491	67.8869	13146.6	44.8561	95.0562	57.2859	15.2804	27.4337	0.35025
B	B1-RL	M	HFHS	0.8206	1.0583	0.1038	0.1145	3.855	3.12	0.42	0.69	37.08	56.47	8.48	9.4	19.2	13.4	7.7	7	8.5	6	10	15	18	20	21	22	24	26	27	0	1.52805	14.1349	65.4629	13709.8	24.2494	108.393	49.4208	17.6694	32.9098
B	B1-RR	M	HFHS	1.2662	1.251	0.1263	0.1378					38.12	56.09	8.36	8.8	20.5	14.4	10	7.7	10.3	7	12	17	21	22	21	24	25	28	30	0	3.14322	16.1455	51.1492	12121.8	41.6577	108.335	39.6106	30.3597	30.0297	0.22925
B	B2-0	M	HFHS	0.7597	0.9564	0.0762	0.1302	3.66	1.14	2.06	1	29.65	61.2	8.2	10.7	18.8	15.5	10.1	8.5	8.9	6	11	16	19	20	22	23	24	25	27	47.4044	7.26071	17.7569	31.1344	5849.1	50.4229	127.142	63.4039	21.3198	15.2763
B	B2-L	M	HFHS	1.1541	1.0187	0.1205	0.133	4.248	3.372	0.684	0.432	38.04	57.98	8.39	8.3	17.7	14.2	8.9	8.4	7.1	7	13	19	21	22	23	25	26	29	30	38.2726	2.29447	17.1639	18.667	14163.2	13.6412	119.026				0.97225
B	B2-R	M	HFHS	0.7501	0.9653	0.0915	0.1205					27.8	62.47	7.8	8.4	21.3	11.2	6.7	7.8	7.1	6	9	15	19	20	21	21	23	24	25	14.1672	10.5881	17.4196	33.5401	8505.63	29.9237	169.421	71.9248	17.8687	10.2065	0.22325
B	B5-RL	M	HFHS	1.1107	1.1308	0.1017	0.1584	4.332	3.372	0.72	0.54	36.49	57.25	8.22	9.7	16.4	14.1	10.6	9.5	9.3	6	11	18	20	22	23	25	26	28	30	0	2.06616	20.1288	26.0053	12311.6	14.0513	88.4193				0.5895
B	B5-RR	M	HFHS	0.7408	1.0108	0.1183	0.1591	3.33	0.705	2.325	0.69	23.95	65.05	7.5	9.6	16.3	11.9	8.6	8.1	8.7	5	10	15	19	20	22	23	24	25	26	6.68884	4.72208	21.8086	44.2412	3603.86	43.5519	96.5441				0.27475
B	B6-R	M	HFHS	0.7655	0.8974	0.1668	0.1427	2.6	2.08	0.2	0.74	24.33	65.8	8.14	7.3	27.4	21.6	17.6	18.5	18.5	5	11	16	18	20	20	22	23	24	26	59.6939	1.45752	20.2687	190.593	7827.43	29.4259	189.626				0.2805
B	B8-0	M	HFHS	1.3672	1.2031	0.0889	0.1544	3.43	2.76	0.44	0.51	39.08	56.22	8.17	7.9	14.4	11.9	9.9	8.8	7.2	6	12	18	20	23	24	25	27	29	30	0	1.61368	9.64949	59.5404	12830.9	20.1682	82.3933	35.3337	28.8599	35.8063
B+C	C1-LL	M	HFHS	0.5498	0.8248	0.0908	0.1086	2.87	2.42	0.24	0.47	21.71	67.54	6.47	7.8	21.3	9.2	6.3	5.2	6.3	4	9	13	15	18	19	20	21	21	22	0	4.10317	18.1059	11.5263	2997.26	8.08971	144.019				0.02375
B+C	C1-LLR	M	HFHS	0.3496	0.7499	0.064	0.1121		0.42			11.38	72.83	6.78	7.2	15.6	7.4	6.7	6.6	6.3	5	8	13	16	17	19	19	20	21	21	0	5.59216	26.9924	10.2648	560.238	20.4166	94.8199	56.3822	39.3659	4.25188
B+C	C1-R	M	HFHS	0.4021	0.7008	0.0725	0.1067	2.34	2.03	0.12	0.44	14.64	71.04	6.44	8.6	27.6	20.3	10.3	9.1	8.8	5	8	11	14	15	16	18	19	19	20	48.4997	2.54154	17.2424	44.5825	1294.64	8.61874	118.928	64.1453	32.9492	2.90558	0.034
B+C	C3-L	M	HFHS	0.501	0.882	0.0779	0.1314	2.505	2.13	0.165	0.45	18.72	73.24	7.59	9.2	18.8	11.8	8.3	8	8.3	6	10	16	19	19	21	21	22	23	23	0	1.19602	9.9439	13.0382	2747.38	9.50256	124.439				0.119
B+C	C3-R	M	HFHS	0.3117	0.8147	0.0847	0.091					13.57	71.77	6.69	10.3	14	13.2	6.6	6.6	10.9	6	10	15	18	18	19	19	20	20	21	0	0.812204	8.03539	11.6511	1333.37	16.7727	80.6226	72.8742	25.1094	2.01632
B+C	C3-RR	M	HFHS	0.3209	0.7902	0.0721	0.1065	2.42	2.07	0.12	0.5	11.67	72.81	6.7	12.5	16.5	10.9	8.7	7.9	5.4	6	9	14	18	19	19	19	20	21	22	0	1.53925	14.5412	57.3382	1293.55	8.59667	139.647	68.2901	30.3203	1.38959	0.2215
B+C	C5-0	M	HFHS		0.5211	0.0638	0.0927					6.2	77.39	6.02	3.2	14.7	11.6	5.7	5.6	2.7	5	8	12	15	17	17	16	15	15	14	66.2038	3.06207	11.1841	129.667	#DIV/0!	15.8079	116.043				0.21375
B+C	C7-LL	M	HFHS	0.2579	0.7482	0.0788	0.0976	2.088	1.656	0.276	0.348	9.75	76.64	6.56	6.9	17.6	10.2	7.1	4.9	7.1	6	10	14	17	18	19	20	20	20	20	36.9279	1.53964	8.21307	23.4484	846.344	11.243	112.912				0.125
B+C	C7-R	M	HFHS	0.2465	0.7729	0.0821	0.0949	1.76	1.4	0.22	0.32	10.45	75.23	6.88	7.2	16.7	13.9	7.2	7.1	6.8	5	9	13	16	17	19	19	19	18	19	30.001	1.30678	9.52677	19.0436	759.231	13.1534	74.1247	54.671	39.742	5.58699	0.07925
B+C	C7-RL	M	HFHS	0.2831	0.8242	0.0826	0.1157	1.908	1.68	0.036	0.408	9.68	75.96	6.63	7.2	19.5	13.6	7.7	7.2	6.9	6	9	13	15	18	19	21	21	21	22	0	2.20823	19.171	121.065	715.07	16.8763	112.333	56.2405	39.7642	3.99532	0.03325
B+R	R2-0	M	HFHS	1.1364	1.1101	0.0915	0.1531	3.876	3.216	0.444	0.492	33.77	59.53	8.36	14.4	26.8	22.8	15.8	10.4	9.7	7	12	18	20	22	23	23	24	26	28	28.1771	4.25708	20.5076	133.649	12474.4	13.0936	123.442				0.17825
B+R	R3-R	M	HFHS	0.6631	0.9079	0.0693	0.1044	3.96	3.276	0.384	0.672	25.42	66.32	7.88	7.1	17.2	13.2	7.7	7.1	6.9	5	9	14	18	20	21	22	22	23	25	0	2.92138	27.8639	78.5504	7147.54	13.3143	117.735	45.5303	32.7013	21.7684	0.202
B+R	R3-RL	M	HFHS	1.3963	1.1418	0.1026	0.1492	2.2	0.2	1.71	0.66	39.28	56.3	8.24	7.9	25.3	17.6	11.3	10.4	9.4	7	12	19	21	23	25	26	28	30	33	0	3.40105	13.4619	11.946	4080.2	17.9479	121.635				0.84075
B+R	R4-RL	M	HFHS	0.5306	0.8577	0.0702	0.1177	2.505	0.75	1.485	0.585	22.68	67.09	7.53	12	28.1	27	21.1	10.8	8.2	5	10	13	17	19	20	18	22	22	24	13.8456	4.12278	15.7818	56.6976	4437.15	23.9909	125.155				0.05925
B+R	R4-RRL	M	HFHS	0.6983	0.9348	0.1192	0.1444	3.15	2.73	0.21	0.465	26.72	63.19	7.64	11.1	24.2	21.7	16.7	9.9	10.2	6	10	16	19	21	20	23	24	24	26	62.5346	3.62824	13.4942	104.286	6306.57	9.70632	132.596				0.3295
B+R	R5-0	M	HFHS	0.9622	0.9795	0.0968	0.1216	3.015	2.58	0.18	0.555	30.39	61.55	8.15	10.3	15	13.4	14.3	8.4	8.3	7	12	18	20	21	23	24	24	26	27	9.40488	2.95145	13.3463	41.0579	10073.3	11.3341	145.751	50.1711	29.1993	20.6296	0.2615
B+R	R5-R	M	HFHS	1.1888	1.1271	0.1214	0.144					38.27	57.02	8.42	9.6	20.1	19.2	11.8	12.4	9.6	6	12	17	19	21	22	24	26	27	30	30.4537	4.78313	6.3783	16.1951	9517.96	39.1965	93.6212	46.4788	17.6866	35.8346	0.48825
B+R	R5-RL	M	HFHS	1.2829	0.9074	0.086	0.1393	3.24	1.41	1.23	1.32	37.82	57.68	8.45	12.3	22.3	21.1	18.3	13.2	10.3	7	12	18	20	21	23	24	26	27	29	0	3.5434	18.7139	62.2973	12890.5	58.9416	109.023	37.3932	25.0634	37.5434	0.50275
B	B3-R.2	F	SD	0.7055	0.9242	0.1002	0.0993	1.86	1.38	0.24	0.54	26.03	66.93	8.08	6.6	12	11.9	9.9	8.9	7.3	7	12	17	18	19	20	21	22	22	24	63.5507	1.97212	21.3552	58.3578	8458.67	28.5774	177.35	49.3029	29.2891	21.408	0.0135
B	B3-RR.2	F	SD									26.12	66.37	8.64							7	12	16	17	18	19	19	20	21	22
B	B4-L.2	F	SD	0.2281	0.6872	0.0902	0.0805	1.23	0.84	0.21	0.39	13.72	72.4	8.9	7.4	16.3	12.6	8.2	7.1	7.6	6	11	15	16	17	17	18	18	19	19	0	1.53141	15.4342	31.9854	2692.57	21.8309	127.29				0.0405
B	B6-L.2	F	SD	0.2998	0.678	0.0897	0.0697	1.575	1.17	0.195	0.465	17.46	70.52	8.9	9.3	15.1	14.1	8.3	8.3	8.1	5	9	14	14	15	15	17	17	18	19	0	1.30638	14.7109	49.2099	7705.95	13.0631	114.985	52.4305	41.9792	5.59027	0.1095
B	B6-LL.2	F	SD	0.5678	0.7583	0.0958	0.0931	1.44	0.285	0.975	0.405	26.74	64.2	9.48	8	16.1	14.6	10.4	9.1	8.4	6	11	15	15	16	17	18	18	20	21	22.0986	4.40966	33.4222	63.4209	5726.58	40.2711	209.253				0.01925
B	B6-R.2	F	SD	0.1686	0.6856	0.0703	0.0866	1.47	1.08	0.21	0.405	11.37	72.95	8.69	7.7	16.5	15.5	8.1	6.9	8.6	5	9	15	15	15	15	17	17	17	18	0	1.40127	17.9218	67.7469	4276.62	0	121.394				0.22775
B	B7-0.2	F	SD	0.1713	0.768	0.0952	0.0948	1.32	0.96	0.21	0.33	10.79	75.48	8.88	6.5	11.7	9.2	7.8	7.9	6.4	7	13	16	16	18	19	19	20	20	21	105.749	2.43836	34.0651	75.0895	804.016	23.5635	96.1278	79.4072	20.4399	0.152905	0.06425
B	B7-RL.2	F	SD	0.4356	0.8044	0.1032	0.0824	1.515	1.14	0.18	0.42	15.7	72.52	8.43	8.4	16.9	13.2	9.4	8.6	8	6	12	17	19	19	20	21	22	23	23	0	2.06749	25.8098	91.0031	4907.08	0	77.7378	51.766	39.8149	8.41914	0.0805
B+M	M1-R	F	SD	0.8396	0.914	0.0901	0.0874	1.605	1.14	0.18	0.63	31.96	61.54	9.06	7.8	20.5	19.3	18.6	12	11.2	6	12	17	19	20	20	21	22	23	25	26.3683	1.56638	36.0408	77.4333	11508.6	23.9227	187.951	42.0139	21.4583	36.5278	0.02775
B+M	M4-0	F	SD	1.2149	0.9824	0.1054	0.084	1.635	1.245	0.18	0.45	38.82	58.19	9.35	6	18.1	15.9	11.7	10.3	10.6	8	15	18	19	21	21	23	24	26	28	0	3.43185	24.4041	58.8067	28187.4	0	201.29				0.06975
B+M	M6-0	F	SD	0.3505	0.7292	0.1148	0.0802					21.19	68.25	8.56	9.2	10.2	13	9.4	8.1	6.7	5	10	15	14	15	17	18	19	20	20	52.0099	2.467	33.4342	39.005	3668.92	32.4147	169.298	40.5791	35.9633	23.4576	0.06875
B+M	M6-LL	F	SD	0.5376	0.8111	0.097	0.1027	1.515	1.125	0.15	0.54	24.35	67.26	8.66	8.7	12.1	11.3	9.4	6.9	7.3	6	12	15	16	16	17	19	19	20	22	0	1.78278	26.2373	27.9697	12990.9	0	96.9115
B+M	M6-LLR	F	SD	0.573	0.7891	0.0774	0.0998	1.335	0.975	0.18	0.375	27.18	66.18	8.51	7.6	13.2	10.8	9	7.2	7.7	6	11	15	16	17	17	18	19	20	21	111.322	3.03156	38.3839	38.0821	7078.03	29.6348	198.151				0.02725
B+M	M6-RL	F	SD	0.4861	0.7167	0.0803	0.0891	1.395	1.035	0.165	0.45	23.65	67.19	7.54	8.9	12.1	13.1	10.2	9.2	6.1	5	9	14	15	16	16	17	19	19	20	0	1.5984	21.0535	56.5045	10540.9	0	76.6662	47.6288	33.6304	18.7408	0.2685
B+M	M6-RR	F	SD	0.7322	0.8726	0.0907	0.0858					30.67	62.32	9.22	10.2	11.7	9	7.7	7.3	6.5	6	11	15	15	17	17	19	20	21	24								45.7502	25.2218	29.028
B+M	M6-RRL	F	SD	0.3733	0.6516	0.0931	0.0844					18.65	68.87	9.37	8.6	12.1	12.4	6.4	6.1	5.9	6	10	15	14	15	16	17	17	18	19
B+M	M8-0	F	SD	1.054	0.9205	0.0921	0.0916								5.7	14.7	13.1	8.3	7.1	7.2	8	14	17	19	19	21	21	23	25	26	227.265	3.72251	39.5584	109.451	8399.63	23.6441	185.781	35.8321	23.88	40.2879	0.21175
B+M	M8-L	F	SD	0.8024	0.8184	0.0916	0.094	1.32	0.975	0.12	0.48				6.8	13.8	11.7	10.7	8.9	8.9	8	13	17	17	19	20	21	22	24	25	0	2.73909	22.386	83.5617	26349	0	112.445	51.4093	39.496	9.09472
B+M	M8-R	F	SD	0.9652	0.8288	0.0977	0.0884	1.575	1.245	0.12	0.435				4.4	10.4	10.1	8.8	7.7	7.5	8	13	17	19	21	21	22	23	25	27	83.698	2.50552	31.2681	87.1666	12163.3	31.8547	155.881	35.5465	30.8957	33.5579	0.071
B+M	M8-RL	F	SD	0.8799	0.8425	0.091	0.098	1.515	1.14	0.12	0.54				5.5	13.7	11.1	9.8	8.4	7.8	8	14	18	18	19	20	21	22	23	25	0	2.00441	32.4255	58.5198	23548.2	0	87.1691	34.1834	36.6962	29.1204	0.05925
B	B1-RL.2	F	HFHS	0.8165	0.9302	0.1117	0.1153	2.025	1.605	0.24	0.42	30.56	64.44	7.89	7	15.8	12.4	13.4	11.1	10.1	8	13	16	17	18	21	20	22	24	25	25.7687	2.81553	26.4184	45.6559	6408.89	21.9462	92.4454				0.493
B	B2-0.2	F	HFHS	0.8018	0.9007	0.1194	0.1162	2.22	1.875	0.12	0.51	32.86	63.01	7.75	7.6	16.1	11.3	7.5	7.6	6.3	8	13	17	18	19	20	20	23	24	25	84.0415	1.84568	9.42316	63.427	14436.6	0	34.9332
B	B2-L.2	F	HFHS	0.7158	0.894	0.0938	0.1047	2.07	1.53	0.345	0.435	30.52	64.36	8.12	7.6	20.7	14.4	10.8	8.3	7.5	7	13	17	18	19	21	21	21	22	24	165.519	3.01709	16.0897	25.0003	8437.2	13.7761	160.173				0.3705
B	B2-R.2	F	HFHS	0.6879	0.8361	0.0954	0.1183	2.055	1.62	0.225	0.45	32.61	63.02	8.24	8.2	18.3	12.6	10.6	9.9	8.2	8	13	16	18	20	20	20	22	22	22	0	3.54297	16.9801	33.383	14976	0	89.5367				0.13775
B	B2-RL.2	F	HFHS	0.578	0.9089	0.1023	0.115	2.355	1.5	0.615	0.525	24.69	68.87	7.35	9.7	18	12.9	8.8	7.4	7.4	7	13	17	18	19	20	23	23	24	25								51.3448	27.403	21.2522	0.2815
B	B5-0.2	F	HFHS	0.3789	0.8424	0.1104	0.1151					16.59	74.11	7.42	9.2	20.2	13.3	10.7	10.4	8.6	5	9	15	17	18	20	20	22	22	23	448.722	2.19545	16.0852	102.219	1905.27	19.8479	102.354	45.7261	39.3094	14.9646	0.1255
B	B5-LL.2	F	HFHS	0.356	0.8331	0.1006	0.1099	2.07	1.56	0.345	0.375	17.94	71.86	7.55	9.4	13.6	10.9	8.2	10.1	7.3	5	10	14	16	17	18	19	20	21	21	0	2.44395	13.4575	80.284	5238.59	0	80.0818				0.182
B	B8-0.2	F	HFHS	0.5317	0.7183	0.0764	0.1059	2.385	1.62	0.57	0.42	21.67	71.06	9.63	9.7	17.3	11.9	8.2	6.5	6.1	5	8	12	14	14	15	17	17	17	16	287.796	2.06759	28.5584	107.754	3279.12	38.1743	104.835	54.0951	35.7516	10.1533	6.32275
B	B8-R.2	F	HFHS	0.4432	0.7247	0.0778	0.0967	1.845	1.425	0.24	0.39	20.88	69.74	8.56	10.1	20.4	14.6	9	9.9	8.4	5	10	14	15	16	16	17	18	18	19	0	1.41405	19.9914	90.1949	7733.25	0	45.6212	43.0652	30.2001	26.7347	0.1535
B+M	M2-L	F	HFHS	0.5679	0.9289	0.1133	0.1011	1.86	1.455	0.24	0.36	19.95	70.49	7.75	7.2	18.9	12.8	7.7	8.4	8.1	8	13	17	18	19	18	20	22	22	23	35.9269	4.41322	18.5298	79.1499	5282.06	25.5691	157.228	52.0525	38.1968	9.75064	0.10075
B+M	M3-0	F	HFHS	0.4397	0.8491	0.0995	0.1136	2.205	1.68	0.315	0.465	17.62	71.31	8.24	5.8	13.1	10	6.6	5.8	6.1	6	12	16	16	18	18	19	19	21	22	0	1.10075	16.7417	27.731	6343.26	0	38.3575	55.3257	38.9258	5.74855	0.06425
B+M	M3-L	F	HFHS	0.4476	0.7533	0.0854	0.0902	1.815	1.44	0.21	0.345	20.15	73.21	8.49	7.3	15.3	13.9	8.3	6.6	7.4	7	12	15	14	16	17	18	19	20	20	101.096	4.16766	19.8768	73.7479	2466.75	22.3058	127.962				0.072
B+M	M3-RL	F	HFHS	0.6955	1.0161	0.0979	0.1108	2.49	1.92	0.33	0.54	28.6	64.72	8.73	5.5	14.6	9.1	8.2	7.6	8.3	6	12	17	16	18	20	21	22	23	24	71.3247	3.94195	27.2245	60.7454	18278.7	0	182.87	44.2229	29.5301	26.247	0.42825
B+M	M3-RRL	F	HFHS	0.6908	0.9415	0.0845	0.1268					28.6	68.1	8.47	5.4	14.8	10.7	7.6	6.5	6.6	7	11	15	15	18	19	20	21	22	24	92.1339	3.22412	19.708	41.0687	5036.41	20.6483	128.104
B+M	M5-L	F	HFHS	0.8793	0.9139	0.1016	0.1213	2.055	1.635	0.195	0.48	31.86	64.76	8.74	6.5	11.6	9.3	8.1	6.8	7.1	7	13	16	17	19	19	20	21	23	25	0	6.43893	21.237	57.0875	24783	11.8678	160.939				0.18925
B+M	M5-RL	F	HFHS	0.6154	0.9635	0.1006	0.1191	1.875	1.455	0.24	0.405	24.35	67.01	8.02	6.6	14	10.2	8.8	8.5	7.6	7	12	16	17	19	19	21	21	22	23	47.6563	2.96443	17.1533	119.915	7198.77	29.159	112.879	77.2675	15.0479	7.68459	0.11675
B+M	M5-RR	F	HFHS	0.7991	0.9256	0.0964	0.1298	2.16	1.485	0.435	0.555	29.31	65.95	8.03	5.8	13.5	12.3	7.2	7.1	6.6	6	11	15	17	20	20	21	21	24	24	132.719	3.9073	48.9543	98.5739	18358.4	0	112.977
B+M	M9-LL	F	HFHS	0.7094	0.8292	0.1009	0.1036					31.81	63.92	7.86	9.1	16.7	11.9	9.1	9.9	9.2	6	12	17	17	19	21	21	21	22	25	110.026	2.59464	30.3839	33.1192	9426.46	36.8525	104.529	45.5636	37.1053	17.3312	0.4805
B+M	M9-RL	F	HFHS	0.4566	0.8493	0.093	0.1068	2.07	1.59	0.33	0.315	21.07	70.52	7.77	8.5	15.7	11.3	10.5	9.1	7.3	6	12	15	18	18	19	20	20	21	22	77.7735	3.02826	32.2183	42.3453	9906.36	0	77.1474	41.2567	39.253	19.4903	0.10125
B	B3-0.2	M	SD	0.654	0.9747	0.1282	0.1059					19.73	70.19	8.09	8.8	15.4	15.7	12.2	9.1	8	8	12	19	21	23	24	25	26	27	28	63.183	3.47774	15.5131	126.267	4220.89	25.0274	121.892	39.8031	39.4913	20.7056	0.00825
B	B3-L.2	M	SD	0.6288	0.7732	0.141	0.1505	1.68	1.23	0.18	0.585	27.9	62.45	8.31	7.3	11.3	9.4	8.3	6.4	6.7	7	9	15	20	22	22	22	24	24	25	0	4.37264	22.2026	64.8307	18971	0	44.6759	57.3866	27.3274	15.286
B	B3-RL.2	M	SD	0.406	0.9677	0.0987	0.1272	1.86	1.53		0.75	14.34	72.8	7.78	8.4	16	14.1	10.3	8.1	10	7	12	19	21	23	23	24	25	25	26											0.00825
B	B4-0.2	M	SD	0.3685	1.0672	0.1333	0.139					9.23	76.9	7.48	6.6	13.5	12.4	7.7	7.3	7.7	7	11	17	21	24	25	26	27	28	29	12.896	3.4548	11.0522	67.1751	1059.49	20.2853	103.015	62.3641	36.6292	1.0067	0.0575
B	B4-R.2	M	SD	0.2681	0.9472	0.1329	0.1488	1.92	1.53	0.075	0.705	7.69	77.97	7.41	6.5	16.1	13.5	8.3	7.8	4.7	7	11	18	21	24	24	25	25	26	27	0	2.99297	9.64351	58.6358	1425.5	0	41.6707	54.0155	39.274	6.71046	0.02925
B	B6-0.2	M	SD	0.6919	0.966	0.1012	0.1321	1.77	1.5	0.03	0.54	27.86	64.03	8.21	9.4	19.9	17	10.9	9.2	9.7	6	11	17	19	20	21	22	24	25	26	66.6231	4.09653	16.6202	45.5579	7728.29	21.1407	147.143	44.3676	27.7797	27.8527	0.073
B	B6-RL.2	M	SD	0.7269	0.9526	0.1297	0.1346	2.04	1.68	0.18	0.39	27.54	63.41	8.48	9.1	15	13.1	10.2	10.4	8.6	5	11	17	19	21	22	23	24	25	26	0	2.16748	13.987	113.679	16301.9	14.0081	115.405	56.8585	27.9455	15.196
B	B6-RR.2	M	SD	0.531	0.8146	0.089	0.1148					23.27	66.84	7.96	9.1	14.9	15.1	12.5	9.2	8.3	5	10	16	18	20	21	21	23	23	24	44.2323	3.80842	21.7959	57.4863	4952.1	30.6518	211.094	51.4498	42.465	6.08529	0.172
B	B6-RRL.2	M	SD	0.4231	0.8647	0.1223	0.0999	1.545	1.215	0.075	0.555	27.53	63.32	8.32	9.1	16.3	10.7	8.8	6.7	9.2	6	10	17	19	20	22	22	24	25	26	0	1.24839	14.9458	59.9256	12555.3	17.6389	87.3602	46.211	30.3673	23.4217
B	B7-L.2	M	SD	0.6819	0.9274	0.0984	0.1179	1.44	1.185		0.585	21.75	67.74	8	8	13.4	10.1	8.4	8.1	7.2	6	12	19	21	22	24	26	26	27	27	0	1.86502	10.6566	50.0811	4714.26	27.5624	101.279	43.2963	39.7647	16.939	0.015
B	B7-R.2	M	SD	0.7805	1.0839	0.1192	0.1375					27.68	63.97	8.33	10.1	15.9	13.6	8.7	10.2	8.7	7	13	19	20	21	23	24	25	25	27	75.4427	2.88029	19.8295	158.649	16621.1	0	96.2157	33.6286	45.3251	21.0463	0.237
B	B7-RR.2	M	SD	0.5352	0.9986	0.1109	0.1145	1.815	1.575		0.765	18.3	70.49	8.1	6.1	16.3	12.9	8.4	8.1	7.2	7	13	19	21	22	24	25	25	26	27								48.6261	47.4225	3.95136
B+M	M1-0	M	SD	0.5845	0.9697	0.1186	0.1195	2.205	1.83	0.105	0.585	24.32	65.71	8.2	7.1	16.8	16.7	11.7	8.9	10.1	5	12	18	19	21	22	23	24	25	27	63.9861	3.38569	13.5193	39.5974	5101.55	24.6954	137.096
B+M	M1-L	M	SD	0.8972	1.0302	0.0892	0.1061	2.16	1.74	0.135	0.615	29.86	61.9	8.24	5.9	16.3	18.7	11.9	12.7	8.4	7	13	19	21	22	22	23	26	26	28	63.1075	1.95475	12.7955	184.271	17278.8	0	89.0247	47.197	38.6049	14.1981	0.047
B+M	M1-RL	M	SD	0.7931	1.0638	0.1006	0.1202					29.18	62.36	8.59	6.9	15.3	17.4	13	10.8	11.8	6	13	18	20	21	22	23	25	25	27	35.9233	4.04457	15.7912	150.072	8525.01	23.1672	219.306
B+M	M1-RR	M	SD	0.8522	1.0585	0.1176	0.1194					28.27	62.54	8.3	6.8	15.2	14.1	12.2	8	7.5	7	12	18	20	23	23	24	26	27	28											0.07025
B+M	M4-L	M	SD	1.0055	1.1351	0.1357	0.1557	1.8	1.47		0.81	32.94	61.55	8.48	6.9	15.6	10.3	8.9	9.1	8.5	8	15	19	21	23	24	27	27	28	29	0	2.34261	12.9965	73.0427	21376.8	5.97463	111.414				0.07875
B+M	M4-R	M	SD	1.1047	1.1475	0.1317	0.1422	2.49	2.055	0.09	0.75	37.26	58.1	9.07	6.7	11.1	12.2	8.9	7.6	9.3	9	16	21	23	26	26	29	29	30	31	93.2286	1.88586	12.171	92.9189	11456.6	30.0259	90.8143				0.08575
B+M	M6-L	M	SD	0.5792	0.9515	0.1212	0.1314	1.83	1.575	0.06	0.42	24.08	66.13	8.15	9.7	19.2	19.8	14.2	13.4	10.8	6	10	16	18	19	20	21	21	22	24	63.9587	2.23467	13.0473	109.218	6542.92	24.9363	149.943				0.02725
B+M	M6-R	M	SD	0.5217	0.9399	0.1009	0.1223	1.53	1.29	0	0.525	20.25	68.6	8.4	9.9	19.1	11.6	11.9	11.4	9.8	6	11	17	19	21	22	23	23	23	24	56.6691	1.87828	16.3632	41.518	7478.12	0	71.6984	46.4883	43.4735	10.0383	0.073
B+M	M9-0	M	SD	0.84	0.9357	0.0999	0.1271	1.83	1.455	0.135	0.525	27.35	63.37	8.24	9.7	15.3	14.7	9.8	9.1	9.6	7	13	18	20	21	22	23	24	26	26	90.587	3.54583	15.7715	32.0825	7278.39	23.7029	123.164				0.0505
B+M	M9-L	M	SD	0.3905	0.8603	0.0823	0.116	1.875	1.545	0.135	0.435	18.89	68.49	7.63	7.6	17.3	15.2	8.3	7.2	7.7	5	11	17	19	20	21	22	22	24	25	0	3.42523	16.717	62.7002	8718.92	0	84.2341	62.7	35.9385	1.36147	0.0985
B+M	M9-R	M	SD	0.7746	1.0214	0.1082	0.1248					28.86	62.6	8.52	9	12.8	13.1	9.8	9.7	7.9	7	13	19	21	23	22	24	23	26	26	0	1.75267	14.1757	72.7033	13512.8	6.30069	92.0341	37.3502	36.3973	26.2525
B+M	M9-RR	M	SD	0.4353	0.9053	0.1113	0.1073					19.22	68.27	8.05	7.3	16.1	11.6	9.3	8.9	9.1	6	12	17	19	20	21	22	23	24	25								52.4522	44.4653	3.08252
B	B1-0.2	M	HFHS	1.1969	1.0521	0.1006	0.1427	3.51	2.955	0.315	0.54	36.01	60.26	8.36	9.9	20.3	14.6	11.1	11.2	11.4	8	13	18	21	23	24	25	27	27	29	80.983	2.6805	13.2171	58.8911	10056	27.6519	92.8576				0.45925
B	B1-L.2	M	HFHS	0.8457	0.8902	0.1258	0.1567					26.9	65.6	8.12	10.7	21.8	14.6	11.3	9.2	9.3	8	13	18	19	21	22	23	24	26	27	0	2.05097	13.6435	43.3144	11036.2	0	63.0107	40.1311	42.456	17.4129	0.06625
B	B1-R.2	M	HFHS	0.4407	0.8397	0.108	0.1414	2.43	2.07	0.075	0.615	17.77	72.31	7.39	8.6	20.3	12.5	9.2	10.1	9.3	8	13	18	21	22	23	21	18	24	26	58.7694	2.53177	16.9634	76.6105	2252.2	15.7583	124.761	58.3883	35.4463	6.16543	0.04775
B	B1-RR.2	M	HFHS	0.9883	1.0389	0.1139	0.1809	2.835	2.445	0.135	0.555	27.76	65.7	7.99	8.1	19.3	15.8	11.7	9.5	9	8	14	18	21	22	25	26	28	28	29	0	1.81013	10.1869	62.1776	12422.3	4.4156	109.214	32.8625	35.6532	31.4843
B	B5-R.2	M	HFHS	0.4446	0.8925	0.1093	0.1412					14.57	73.48	7	9.6	20.5	15.7	10.9	9.9	7.9	6	9	15	18	20	21	22	23	24	25	51.352	2.71915	13.3325	249.475	2110.94	19.5981	143.333	45.7244	42.8199	11.4557	0.0725
B	B5-RL.2	M	HFHS	0.6947	0.9036	0.1084	0.1667	1.62	1.23	0.24	0.315	23.28	69.1	6.54	10.8	20.3	13.9	11.7	8.9	11.9	6	11	16	19	21	21	23	25	27	28	0	1.17218	6.56288	70.5102	8124.86	31.0161	89.0587	41.9934	39.3104	18.6962
B	B5-RR.2	M	HFHS	0.7192	0.7946	0.1006	0.1283	2.88	2.46	0.21	0.465	24.52	68.04	7.21	11.1	20.6	16	14.1	9.5	9	6	10	16	19	21	22	22	24	25	27								46.7602	30.8812	22.3586
B	B5-RRL.2	M	HFHS	0.6105	0.8671	0.1209	0.1344					20.42	70.07	7.06	10.1	18.8	12.2	10.3	10.8	10.4	6	10	15	19	21	21	23	24	25	26	23.8896	3.13725	10.5512	85.5424	3911.27	21.3254	120.065				0.0415
B	B8-L.2	M	HFHS	0.5839	0.8413	0.1064	0.13					18.62	69.51	7.33	11.3	18.6	14.2	10.1	13.3	6.6	6	9	14	15	16	18	19	20	20	20	199.396	2.279	13.3761	63.4204	4085.12	0	83.4172
B	B8-LL.2	M	HFHS	0.7445	0.8883	0.0999	0.1364	2.85	2.43	0.24	0.375	26.66	64.33	7.7	8.7	22.6	14.6	11.4	13.2	10.3	6	11	16	18	20	21	22	23	23	24	92.5495	3.10014	21.6629	90.0215	6425.62	25.3537	125.635	43.3556	30.7132	25.9312	0.0995
B	B8-RL.2	M	HFHS	0.7734	0.8784	0.0871	0.1265	2.685	2.25	0.24	0.42	29.32	62.13	8.04	8.7	25.4	12.1	9	9.3	9.5	6	11	16	19	20	21	23	24	24	25											0.082
B	B8-RR.2	M	HFHS	0.8757	1.0109	0.1019	0.1615	2.43	1.875	0.405	0.345	28.14	63.6	7.75	9.8	20.8	11.7	11.6	9.6	8.2	6	11	16	19	21	21	23	23	24	25	0	3.51828	16.3123	73.9023	11900.1	11.0539	110.956	44.4484	35.3205	20.2311	0.17975
B+M	M2-R	M	HFHS	1.1337	1.0409	0.1112	0.1643	2.73	2.325	0.225	0.39	35.58	59.38	8.31	9.1	25.4	17.7	13.2	14.2	18.4	7	12	18	20	23	21	24	26	28	29	59.9902	3.33656	14.4744	90.5475	11284.1	25.7567	146.703				0.26925
B+M	M2-RL	M	HFHS	0.9605	1.0018	0.1256	0.1464	2.85	2.28	0.33	0.525	33.24	60.91	7.92	9.4	20.1	14.4	11.7	12.6	11.8	7	12	18	20	21	22	22	24	26	29	0	2.53731	13.0032	236.561	24809.8	5.66045	110.354				0.50175
B+M	M3-LL	M	HFHS	0.8343	0.9096	0.0947	0.1389					31.57	63.09	7.83	8.5	17.4	10.7	8.5	7.7	8.7	7	12	16	18	20	21	23	24	25	27	73.6575	2.59658	15.9513	103.685	8378.94	21.5272	144.482				0.14075
B+M	M3-LLR	M	HFHS	1.062	0.9245	0.1138	0.1196	2.76	2.385	0.165	0.465	32.85	62.43	7.73	7.2	17.7	14.6	8.1	8.1	7.9	6	12	17	18	19	21	22	22	24	26											0.06425
B+M	M3-R	M	HFHS	0.7469	0.8243	0.1016	0.1111					8.1	-10.03	0.85	7.7	16.3	13.6	10.4	9.8	10.2	6	11	15	17	19	20	21	22	24	24	0	2.35905	11.4184	68.2392	12374.7	0	66.8777	49.3333	30.3268	20.3399
B+M	M3-RR	M	HFHS	0.8639	1.0734	0.0935	0.1382	3.105	2.61	0.225	0.57	30.13	65.85	8.21	10.3	18.2	14.9	11.1	9.3	10.2	6	12	17	19	20	21	22	23	26	26	0	3.1327	14.0604	74.5288	16171.7	0	98.3018	49.749	29.296	20.9549
B+M	M5-0	M	HFHS	0.9061	1.0042	0.1182	0.1348	2.94	2.535	0.18	0.48	27.31	64.88	7.84	8.7	16.7	9	10.1	8.6	6.1	6	12	16	18	21	21	23	25	26	27	109.131	2.87021	14.7188	47.5023	7474.32	24.2899	126.119				0.19675
B+M	M5-R	M	HFHS	0.8875	0.9696	0.1061	0.1465					27.11	65.64	7.92	8.9	24.6	16.2	11.1	11.7	9.2	6	12	17	19	20	22	23	24	24	26	0	1.85099	14.2464	83.671	12047.3	26.2687	154.49	43.6394	30.4791	25.8815	0.0555
B+M	M7-0	M	HFHS	1.1519	0.9145	0.4829	0.1414	3.255	2.625	0.42	0.45	33.28	61.99	8.13	9.6	20.7	17.6	11.4	10.3	9.4	7	12	17	20	21	23	24	26	27	28	118.626	2.95487	15.2234	21.4585	8458.64	17.0603	111.042				0.22925
B+M	M7-L	M	HFHS	0.5899	0.8704	0.1394	0.1332	2.97	2.49	0.255	0.495	35.23	60.78	8.15	10	20.7	15.7	11.3	9.6	10.3	6	12	16	19	20	21	23	25	26	27	139.981	2.41016	15.5514	26.8888	9601.68	18.6048	108.075	45.4887	28.2517	26.2596	0.20875
B+M	M7-R	M	HFHS	1.248	1.0273	0.1019	0.1397					39.56	57.63	8.67	9.9	22.1	15.9	9.1	9.5	8.1	7	13	18	20	22	23	25	28	30	31	57.226	2.25195	14.3188	65.3033	30164.4	0	35.1047
B+M	M7-RL	M	HFHS	1.581	1.0085	0.1057	0.165	3.45	2.895	0.33	0.495	42.77	55.14	8.39	8.9	20.3	13.5	11.7	11.5	10.2	7	13	17	20	22	22	24	26	27	29								43.5111	29.1841	27.3048

## Sheet: energy_intake
colonization	diet	sex	age_weeks	kcal/day
B	SD	NA	3	14.3393
B	SD	NA	3	14.3262
B	SD	NA	3	12.0367
B	SD	NA	3	13.0833
B	SD	NA	3	10.048
B	SD	NA	3	19.1889
B	SD	NA	3	11.8124
B	SD	NA	3	9.00133
B+C	SD	NA	3	12.8949
B+C	SD	NA	3	16.2383
B+C	SD	NA	3	11.6703
B+R	SD	NA	3	16.7467
B+R	SD	NA	3	20.5844
B+R	SD	NA	3	12.4105
B+R	SD	NA	3	14.444
B+M	SD	NA	3	11.0947
B+M	SD	NA	3	15.7
B+M	SD	NA	3	13.7375
B+M	SD	NA	3	14.915
B+M	SD	NA	3	7.58833
B	HFHS	NA	3	7.152
B	HFHS	NA	3	7.152
B	HFHS	NA	3	8.344
B	HFHS	NA	3	8.94
B	HFHS	NA	3	5.364
B	HFHS	NA	3	10.728
B	HFHS	NA	3	9.685
B	HFHS	NA	3	6.38571
B	HFHS	NA	3	3.97333
B+C	HFHS	NA	3	4.22167
B+C	HFHS	NA	3	4.172
B+C	HFHS	NA	3	5.96
B+C	HFHS	NA	3	4.71833
B+R	HFHS	NA	3	7.45
B+R	HFHS	NA	3	5.96
B+R	HFHS	NA	3	11.026
B+R	HFHS	NA	3	8.94
B+M	HFHS	NA	3	7.45
B+M	HFHS	NA	3	6.705
B+M	HFHS	NA	3	8.94
B+M	HFHS	NA	3	8.5675
B+M	HFHS	NA	3	8.94
B	SD	M	5	45.53
B	SD	M	5	15.0458
B	SD	M	5	23.8989
B	SD	M	5	9.59444
B	SD	M	5	19.1889
B	SD	M	5	11.5133
B	SD	M	5	16.2233
B	SD	M	5	16.0489
B	SD	F	5	24.4658
B	SD	F	5	32.5775
B	SD	F	5	12.2983
B	SD	F	5	13.6067
B	SD	F	5	22.765
B	SD	F	5	23.0267
B+C	SD	M	5	14.2347
B+C	SD	M	5	16.9037
B+C	SD	M	5	22.8871
B+C	SD	F	5	26.847
B+C	SD	F	5	19.7471
B+C	SD	F	5	32.028
B+R	SD	M	5	28.26
B+R	SD	M	5	18.1422
B+R	SD	M	5	53.38
B+R	SD	M	5	16.0489
B+R	SD	M	5	19.8867
B+R	SD	M	5	17.7933
B+R	SD	F	5	12.56
B+R	SD	F	5	25.12
B+M	SD	M	5	20.9333
B+M	SD	M	5	14.13
B+M	SD	M	5	12.8217
B+M	SD	M	5	23.8117
B+M	SD	F	5	60.7067
B+M	SD	F	5	26.8644
B+M	SD	F	5	11.1644
B+M	SD	F	5	15.4383
B+M	SD	F	5	19.8867
B	HFHS	M	5	16.39
B	HFHS	M	5	16.7625
B	HFHS	M	5	20.115
B	HFHS	M	5	13.41
B	HFHS	M	5	8.94
B	HFHS	M	5	24.9575
B	HFHS	M	5	12.4167
B	HFHS	M	5	9.685
B	HFHS	M	5	21.9775
B	HFHS	F	5	11.92
B	HFHS	F	5	20.86
B	HFHS	F	5	28.31
B	HFHS	F	5	22.35
B	HFHS	F	5	9.685
B	HFHS	F	5	26.82
B	HFHS	F	5	12.4167
B	HFHS	F	5	27.565
B	HFHS	F	5	11.175
B+C	HFHS	M	5	31.29
B+C	HFHS	M	5	26.3233
B+C	HFHS	M	5	32.035
B+C	HFHS	M	5	14.9
B+C	HFHS	F	5	26.82
B+C	HFHS	F	5	29.055
B+C	HFHS	F	5	11.5475
B+C	HFHS	F	5	9.43667
B+R	HFHS	M	5	19.37
B+R	HFHS	M	5	21.2325
B+R	HFHS	M	5	23.3433
B+R	HFHS	M	5	14.9
B+R	HFHS	F	5	11.92
B+R	HFHS	F	5	25.33
B+R	HFHS	F	5	12.4167
B+M	HFHS	M	5	30.2967
B+M	HFHS	M	5	11.175
B+M	HFHS	M	5	26.075
B+M	HFHS	M	5	8.5675
B+M	HFHS	F	5	10.43
B+M	HFHS	F	5	19.37
B+M	HFHS	F	5	9.93333
B+M	HFHS	F	5	23.84
B	SD	M	7	17.27
B	SD	M	7	16.0925
B	SD	M	7	15.5256
B	SD	M	7	12.0367
B	SD	M	7	18.4911
B	SD	M	7	21.98
B	SD	M	7	20.1483
B	SD	M	7	11.8622
B	SD	F	7	12.9525
B	SD	F	7	18.7092
B	SD	F	7	18.5783
B	SD	F	7	17.7933
B	SD	F	7	14.13
B	SD	F	7	10.99
B+C	SD	M	7	35.168
B+C	SD	M	7	19.5203
B+C	SD	M	7	19.7471
B+C	SD	F	7	20.567
B+C	SD	F	7	15.2116
B+C	SD	F	7	28.888
B+R	SD	M	7	16.0489
B+R	SD	M	7	23.0267
B+R	SD	M	7	31.4
B+R	SD	M	7	17.4444
B+R	SD	M	7	27.2133
B+R	SD	M	7	13.0833
B+R	SD	F	7	10.048
B+R	SD	F	7	18.4911
B+M	SD	M	7	16.2233
B+M	SD	M	7	17.27
B+M	SD	M	7	19.8867
B+M	SD	M	7	9.68167
B+M	SD	F	7	16.7467
B+M	SD	F	7	39.7733
B+M	SD	F	7	25.12
B+M	SD	F	7	13.2578
B+M	SD	F	7	12.8217
B	HFHS	M	7	11.92
B	HFHS	F	7	7.45
B	HFHS	M	7	8.5675
B	HFHS	F	7	8.94
B	HFHS	M	7	11.175
B	HFHS	F	7	8.44333
B	HFHS	M	7	11.92
B	HFHS	F	7	8.94
B	HFHS	M	7	10.43
B	HFHS	F	7	7.45
B	HFHS	F	7	16.39
B	HFHS	M	7	13.0375
B	HFHS	F	7	12.4167
B	HFHS	F	7	13.41
B	HFHS	M	7	11.4233
B	HFHS	M	7	14.9
B	HFHS	F	7	9.685
B	HFHS	M	7	17.135
B+C	HFHS	M	7	17.88
B+C	HFHS	F	7	8.44333
B+C	HFHS	M	7	16.39
B+C	HFHS	F	7	20.86
B+C	HFHS	M	7	11.92
B+C	HFHS	F	7	12.665
B+C	HFHS	M	7	7.45
B+C	HFHS	F	7	7.94667
B+R	HFHS	M	7	13.41
B+R	HFHS	F	7	7.45
B+R	HFHS	M	7	7.0775
B+R	HFHS	F	7	8.94
B+R	HFHS	M	7	8.94
B+R	HFHS	M	7	10.8025
B+R	HFHS	F	7	8.44333
B+M	HFHS	M	7	12.9133
B+M	HFHS	F	7	5.96
B+M	HFHS	M	7	9.685
B+M	HFHS	F	7	15.2725
B+M	HFHS	F	7	10.9267
B+M	HFHS	M	7	8.94
B+M	HFHS	M	7	7.8225
B+M	HFHS	F	7	19.37
B	SD	M	9	17.27
B	SD	M	9	13.7375
B	SD	M	9	13.0833
B	SD	M	9	16.5722
B	SD	M	9	12.9089
B	SD	M	9	14.13
B	SD	M	9	11.2517
B	SD	M	9	11.5133
B	SD	F	9	17.9242
B	SD	F	9	10.8592
B	SD	F	9	17.0083
B	SD	F	9	13.6067
B	SD	F	9	8.37333
B	SD	F	9	18.3167
B+C	SD	M	9	21.5613
B+C	SD	M	9	15.857
B+C	SD	M	9	19.7471
B+C	SD	F	9	14.8103
B+C	SD	F	9	14.8627
B+C	SD	F	9	40.4013
B+R	SD	M	9	11.8622
B+R	SD	M	9	33.4933
B+R	SD	M	9	18.4911
B+R	SD	M	9	18.84
B+R	SD	M	9	6.80333
B+R	SD	F	9	13.816
B+R	SD	F	9	21.6311
B+M	SD	M	9	15.1767
B+M	SD	M	9	17.27
B+M	SD	M	9	14.13
B+M	SD	M	9	8.635
B+M	SD	F	9	15.7
B+M	SD	F	9	14.6533
B+M	SD	F	9	14.3044
B+M	SD	F	9	11.5133
B+M	SD	F	9	11.775
B	HFHS	M	9	11.92
B	HFHS	M	9	8.195
B	HFHS	M	9	10.43
B	HFHS	M	9	10.43
B	HFHS	M	9	11.92
B	HFHS	M	9	7.0775
B	HFHS	M	9	7.45
B	HFHS	M	9	7.45
B	HFHS	M	9	7.45
B	HFHS	F	9	10.43
B	HFHS	F	9	8.94
B	HFHS	F	9	8.94
B	HFHS	F	9	10.43
B	HFHS	F	9	9.685
B	HFHS	F	9	8.195
B	HFHS	F	9	11.92
B	HFHS	F	9	8.94
B	HFHS	F	9	13.41
B+C	HFHS	M	9	21.8533
B+C	HFHS	M	9	19.8667
B+C	HFHS	M	9	4.47
B+C	HFHS	M	9	19.8667
B+C	HFHS	F	9	17.3833
B+C	HFHS	F	9	9.685
B+C	HFHS	F	9	8.94
B+C	HFHS	F	9	11.4233
B+R	HFHS	M	9	6.95333
B+R	HFHS	M	9	5.5875
B+R	HFHS	M	9	8.44333
B+R	HFHS	M	9	5.96
B+R	HFHS	F	9	8.94
B+R	HFHS	F	9	11.175
B+R	HFHS	F	9	9.43667
B+M	HFHS	M	9	7.94667
B+M	HFHS	M	9	11.92
B+M	HFHS	M	9	10.43
B+M	HFHS	M	9	7.8225
B+M	HFHS	F	9	8.94
B+M	HFHS	F	9	14.155
B+M	HFHS	F	9	10.9267
B+M	HFHS	F	9	9.685

## Sheet: WAT_immune
colonization	mouse	sex	diet	gdTcells	Bcells	ILC2	ILC3	ILC1	NK	CD4+NKT	Tregs	Th17	Th1	Th2	CD8+Tcells	CD8+NKT	Eosinophils | Count	CD64+	VAM1	VAM2	Intmacrophages	CD9+macrophages	CX3CR1+macrophages	CD11c+macrophages	preVAM	Monocytes	cDC1	cDC2	CX3CR1+DC	Neutrophils
B	B3-0	F	SD	2343.61	70218.2	18839	1772.73	360.556	345.533	240.37	1532.36	1246.92	2553.94	5483.45	2133.29	90.1389	104625	102179	29524.9	2446.11	5864.93	5178.3	8725.87	4334.33	18381.6	1015.63	1559.21	44687.9	8039.25	5392.88
B	B3-L	F	SD	2200.07	111988	18246.9	2472.24	34.0216	181.449	158.768	635.07	408.26	793.838	1859.85	2835.14	113.405	127308	173771	39636	25076.7	2898.26	7755.11	20163.3	4585.14	30635.5	350.961	1007.6	78377.5	12419.5	12510.1
B	B3-R	F	SD	1098.25	23051.4	9128.44	1145.48	82.6638	177.137	47.2364	425.128	602.265	578.647	1983.93	1310.81	82.6638	66432.6	95521.6	32783.8	5313.62	2174.88	3892.53	6475.2	2113.09	14210.8	234.788	889.722	33327.5	5498.98	3731.89
B	B3-RL	F	SD	2494.74	106892	20974.9	2145.16	111.23	238.351	158.9	429.031	476.701	603.822	1175.86	2510.63	63.5602	143296	244987	85302.6	25470.9	4796.77	8921.99	25326.9	3917.36	42819.2	559.623	1598.92	76092.8	12183.8	6443.66
B	B4-0	F	SD	2300.84	33106.5	6902.52	1252.68	178.954	102.26	587.992	1175.98	1354.94	1789.54	4678.37	5675.4	153.389	169294	92704.2	29735.3	6884.9	7964.15	3498.27	10197.1	5210.19	11722.9	1302.55	2419.02	42016.5	8038.59	12988.3
B	B4-LL	F	SD	2683.11	134140	22380.7	2152.92	321.331	128.532	160.666	433.797	546.263	1285.32	2699.18	3165.11	257.065	225741	248328	73931.4	36474.3	8039.18	8184.17	16835.6	3093.23	30062.3	1079.41	5252.05	79264	15965.6	4897.62
B	B4-R	F	SD	3798.3	107706	17201.5	3012.44	436.586	218.293	349.269	654.879	349.269	829.513	1659.03	3492.69	43.6586	202335	260070	93973.9	29279.2	13975.4	11262.7	17286.9	3274.03	32422.2	823.184	2937.27	68642.3	11487.2	4901.69
B	B4-RL	F	SD	4302.95	143573	14884.6	1830.27	666.654	496.96	327.266	1587.85	824.226	2242.38	2509.04	4533.24	278.782	195717	253008	102777	12055.2	13689.2	8887.14	26594.7	8103.47	38833.3	983.754	3451.48	75982.5	12805.5	4702.01
B	B7-R	F	SD	1904	87550.4	11206.8	2638.87	1169.12	1152.42	334.034	334.034248+BC10531502	367.438	1152.42	2071.01	2087.71	0	238492	139017	39495.9	15335.7	2589.14	10433.2	17817.6	3630.92	39266	413.649	3033.43	50235.4	9008.36	11306.4
B	B7-RR	F	SD	3450.73	140123	24678.6	3450.73	1452.94	1431.57	235.034	908.087	1036.29	1880.27	7809.55	2553.33	85.467	375250	249008	84169.4	39579.5	2645.66	11706.5	24864.5	5747.87	44098.2	257.542	5701.04	73949.7	9856.83	11050.9
B+C	C2-0	F	SD	4692.61	76994.2	13759.1	2780.15	2036.41	495.823	354.159	495.823	903.106	743.734	2213.49	3311.39	194.787	177878	196708	70353.3	21958.5	10649.2	10419.5	19317.7	3846.33	21126.1	315.743	2985.21	58441.2	20638.1	9615.82
B+C	C2-L	F	SD	11465.6	195844	27897	8801.09	2583.81	2987.53	322.976	928.555	2462.69	767.067	4117.94	3633.48	161.488	300768	505032	170025	38879.6	33807	32569.8	65387	11598.9	66191.2	2505.37	10887.5	141290	37054.7	15155.9
B+C	C2-R	F	SD	5172.92	63363.4	11282.8	1346.91	683.216	156.164	234.246	429.45	253.766	214.725	1756.84	3533.21	117.123	141255	60268.4	18023.1	7288.93	3703.06	2003.87	5249.9	1031.23	5613.18	304.682	1898.4	29073.7	8648.28	9679.51
B+C	C2-RR	F	SD	5761.93	103269	10202.8	1416.61	604.844	604.844	111.419	461.591	764.013	811.764	2292.04	2403.46	143.253	133813	120131	42486.5	5633.8	8217.73	4193.58	9530.87	2160.33	12284.2	169.438	2753.36	49179.3	15588.3	9700.31
B+C	C4-L	F	SD	8063.4	78701.2	15129.3	3990.13	2597.74	3636.84	394.857	810.496	914.406	2015.85	1226.14	4384.99	727.368	202734	304615	119271	36321.4	8429.55	12874.5	28051.3	9810.86	25448	1257.35	6127.36	76344.1	25678.2	29910.7
B+C	C4-R	F	SD	8164.32	120448	23107.9	4956.91	4738.22	3644.79	170.09	583.166	1020.54	1870.99	801.853	3061.62	364.479	207248	548608	200576	96252.3	16400.8	20856.1	39990.3	8587.8	43348	2216.9	8092.77	114181	39043.3	22642.5
B+C	C4-RL	F	SD	4919.01	118505	14700.9	3404.03	2487.56	2412.75	243.145	392.772	897.766	2038.68	897.766	2300.52	205.738	182887	387487	207404	22470.7	10000.7	8607.3	25716.1	5943.97	27638.6	440.948	6455.47	81592.9	32930	24587.2
B+C	C6-0	F	SD	7778.66	132876	19557.8	1666.86	2583.63	2361.38	361.152	694.524	1666.86	2778.09	5834	3889.33	138.905	172631	417529	160684	35494.8	11547.8	8195.19	42705.5	7583.22	64843.1	2314.88	6306.04	96187.1	25676.5	63725.6
B+R	R6-0	F	SD	4447.69	64026.4	23395.8	3188.27	2303.27	1225.39	295	544.616	748.846	1372.89	1940.19	2099.04	329.039	236088	307215	116889	31140.7	5049.84	16123.2	32345.4	10396.7	59904.9	511.585	5033.33	79295.6	14819.5	14472.9
B+R	R6-LL	F	SD	4093.34	60627.5	20060.1	3849.36	1829.8	1260.53	230.42	474.393	582.826	2046.67	2846.36	1802.69	121.987	243449	315161	121992	40857.6	7233.8	12056.3	24313.6	6363.06	34851.7	513.51	9042.25	85510.6	16097.4	16588.6
B+R	R6-R	F	SD	2336.57	25082.9	17602.7	1866.12	1207.49	713.517	203.862	274.43	297.952	627.267	729.198	1411.35	94.0901	141859	88707.3	30128.2	13152.9	2395.1	4338.6	7983.66	3137.01	10330.4	314.508	2935.41	31475	7620.77	8749.77
B+R	R6-RL	F	SD	9626.71	83780.7	20527.6	6597.13	2703.97	2166.01	608.748	6653.76	1769.62	3171.15	7828.78	12415.6	679.533	412319	548960	168061	70352.4	15779.2	40046.3	80732.8	40658.6	90222.5	1697.59	5092.76	165668	25296.8	17782.9
B+R	R6-RR	F	SD	3739.98	75123.7	31303.7	5290.28	2417.41	1129.88	367.867	508.007	481.731	639.388	1182.43	1375.12	236.486	228698	462304	140814	74553	6468.15	15061	43622.4	9514.2	77599.1	582.886	4230.62	92528.5	12748.3	15418.3
B+R	R8-0	F	SD	2769.54	20897.4	18166.6	1575.22	380.892	135.572	464.818	245.32	206.586	316.334	1129.77	1245.97	96.837	220682	184587	48012.8	26565.6	921.904	9160.04	19389.5	8260.26	35504.4	221.257	3134.47	59975.4	9071.54	4624.27
B+R	R8-L	F	SD	1457.2	10361.6	10451.8	805.971	103.164	64.4777	32.2388	90.2688	96.7165	103.164	451.344	515.821	25.7911	207307	177150	49125.6	32525.7	1301.4	6965.78	19099.7	5027.72	30344.2	271.516	2050.41	64058.9	8491.88	3117.75
B+R	R8-LL	F	SD	2644	28938.5	20448.6	1837.46	97.0277	78.835	151.606	394.175	327.468	345.661	1516.06	2983.6	72.7708	295697	178604	40748.1	30423.7	991.768	10930.9	17801.9	8704.73	35639.4	271.131	2590.01	74825	9275.53	5515.37
B	B3-RR	M	SD	3122.82	27307.2	10616.8	1292.33	245.286	453.961	51.2537	1845.13	812.738	882.296	1603.51	1101.95	73.2196	74846.5	88508.4	21133.1	11488.8	2443.09	13665.4	8851.88	9599.34	8152.86	1384.19	2159.33	68268.1	8433.16	7388.1
B	B4-L	M	SD	4452.27	72513.3	20213.5	2841.63	828.329	655.761	276.11	2001.8	345.137	586.733	2392.95	3071.72	172.569	150763	209973	50446.7	22815.9	13682.6	23173.8	21349.5	12712.7	28704.6	4283.75	7897.81	67258.4	11500.3	10842.2
B	B4-LLR	M	SD	4014.98	74475.7	15798.5	1484.7	909.643	460.049	355.493	1191.95	449.594	512.328	1829.74	2258.42	271.847	86027.7	110915	35728.4	16173.9	5363.89	7727.29	9186.43	4706.25	15382.6	482.955	4336.32	44544.9	7809.49	8785.68
B	B4-RR	M	SD	4009.69	53953.6	14076.4	1714.39	942.205	906.784	205.443	1962.34	616.33	510.066	3329.6	2684.93	297.538	104913	118104	26439.1	13753.8	6402.91	10974.1	12524.6	8933.54	14999	1253.27	4964.86	63193.6	7857.02	5543.3
B	B4-RRL	M	SD	10103.4	147837	28879.3	2731.82	2775.19	1879.03	578.164	2659.55	1040.7	1358.69	5304.65	6995.78	534.802	91174.4	96370.6	33167	10405.1	5677.81	3231.79	6235.45	3358.52	8085.8	874.483	6501.59	56752.7	12306.1	15031
B	B7-0	M	SD	3659.77	54518.3	14127.9	1850.33	3935.79	3169.08	276.016	1277.85	419.136	378.245	2412.59	2903.28	173.788	102369	92998.3	18824.4	13401.8	2587.58	12608	11845.1	8463.76	19494.5	515.454	2824.69	42442.5	5113.31	10154.5
B	B7-L	M	SD	5596	97707.4	22574.8	2368.76	6756.53	5119.06	365.647	2241.58	413.341	1017.45	3783.66	3529.29	127.182	193409	120525	34897.6	16268.3	2716.78	8441.41	11061.2	7131.54	19163	614.509	7762.22	40250.3	7907.76	13713.2
B	B7-RL	M	SD	3660.29	38296.2	12471.4	2048.14	4370.04	3173.6	152.09	1216.72	476.548	324.458	2544.97	7117.8	162.229	89345	79813.7	13934.8	11288.8	4152.44	10062.4	12795.3	9376.78	13674.1	772.546	3524.74	30824.6	5600.96	9830.65
B	B9-0	M	SD	11237.6	44421	18153.9	1959.44	4120.11	3188.06	296.563	2234.82	1313.35	3293.97	4247.21	3537.58	614.31	84461.6	367460	77944.2	65007.5	6478.17	46279.7	44846.6	48870.9	60433.5	3062.41	6026.66	160472	20602.5	26305.3
B	B9-L	M	SD	11490.8	141585	31288.1	2658.67	7585.46	4100.65	240.331	2223.07	1201.66	2373.27	3785.22	3319.58	555.766	109562	364128	78187	78818.7	15549.9	30613.9	30451.9	33723.9	33254.2	34371.8	10123.7	109416	18805.7	40786.2
B	B9-R	M	SD	15943.5	152696	39085.9	3381.96	15774.5	11547	531.452	3261.18	1739.3	5507.77	6570.67	6304.95	700.55	170098	464188	106564	90144.6	12554.3	32739.6	38672.1	30967.2	64543.8	6597.15	20948.4	172658	23853.1	47140.1
B+C	C2-RL	M	SD	14303.7	128199	21239.2	2926.91	3257.78	1514.36	369.046	1438.01	839.897	496.303	3155.98	4428.55	343.594	116973	153291	51215.4	14846.9	7448.81	8400.54	14136.2	6179.85	16027	774.068	7601.09	57839.3	12321.6	28031.4
B+C	C4-0	M	SD	22592.6	295771	21869.1	6452.93	11901.7	6334.79	590.657	1742.44	1860.57	2377.39	2894.22	5744.14	546.358	116635	488176	168590	65508.8	18804.5	22612.3	43203.3	16656.9	61701	739.907	14816.2	112556	29686.5	42680
B+C	C4-LL	M	SD	22668.4	155662	23943.7	7131.01	14028.9	13535.2	767.955	1906.17	2797.55	4744.86	1988.45	7830.4	822.809	140203	448888	165317	57462.3	17187.6	21653.4	36945.9	17039.3	47607.8	1186.49	17599.6	118731	34029.1	33452.4
B+C	C4-LLR	M	SD	11094.9	112240	16736.2	4206.12	7297.23	4559.39	287.032	706.54	916.294	1192.29	1391	2362.49	264.952	86499.1	264047	100161	42360.4	8572.65	12325.5	18371.7	8719.82	24908.5	625.472	7284.91	67538.7	20407.6	26944.4
B+C	C4-RR	M	SD	11388	64992.7	17830.2	4560.89	3648.71	3078.6	313.561	1026.2	1510.8	1639.07	1738.84	4546.64	741.145	134199	271726	98776.8	33504.8	10933.3	17686.7	23817.2	11769.3	34652.2	590.104	11539.8	68206.1	24259.8	573.712
B+C	C6-L	M	SD	14379.1	82094.4	18940.7	2096.95	7679.75	7053.39	367.648	1892.71	2096.95	6808.29	6726.59	6985.31	435.731	83029.8	274171	77452	42354.7	9561.98	18511	32130.7	16807	42832.8	1029.75	7808.95	86217.2	17603.8	25474.1
B+C	C6-R	M	SD	15770.9	95419.3	20257.2	2967.83	10836	10439.2	517.645	1984.31	2553.72	5366.26	8109.78	7091.74	552.155	73456.8	242272	75060.5	42671.6	7531.21	16744.8	23678.5	12798.3	31414.1	959.089	8820.48	82151.5	16870.5	67466.4
B+C	C6-RL	M	SD	20342.1	98035	17246.3	1611.53	8792.76	7294.32	409.952	2290.08	2007.35	3633.02	4410.52	6573.37	1696.35	86065.2	267809	74614.6	46776.4	6417.87	20597.5	25164.1	17868.5	34653.7	1727.89	8186.89	88547.4	16236.7	24176.7
B+R	R1-RL	M	SD	7790.92	95376.1	20373.4	3157.23	947.168	1040.03	250.721	2971.51	575.73	1123.6	3853.68	5645.87	352.867	77918.1	204923	58052	26232	4885.89	16061.8	19258.9	12969	22883	1195.38	2713.33	95554.7	16194.6	7475.89
B+R	R1-RR	M	SD	9248.2	79266.6	22949.7	3888.45	1445.03	2246.37	367.826	2220.09	380.963	1247.98	3914.72	4545.28	656.833	85721.1	207830	58171.4	29044.6	6571.19	21717.8	19056.4	14604.5	22374.9	5388.37	3893.43	79478.5	13980.2	7573.29
B+R	R6-L	M	SD	6537.69	64866.1	14704.7	2400.56	3202.45	2043.03	362.637	1465.87	587.37	837.641	1021.51	2145.18	229.841	91449.2	274281	73150.4	41060.6	9908.11	19782.7	29166.4	12318.2	38516.7	1595.56	6382.25	79276	12652.9	17450.8
B+R	R7-0	M	SD	1625.58	17900.8	6476.4	660.593	1185.18	634.687	38.8584	453.348	226.674	395.06	1107.46	556.97	12.9528	55027.5	50055.9	12680.2	4519.03	1513.42	6414.34	6449.7	6173.89	7510.5	367.746	1216.39	23118.5	3401.65	5891.01
B+R	R7-L	M	SD	3844.61	35232.1	10264.9	1215.69	1747.55	1686.76	250.735	547.058	258.333	630.637	1466.42	1519.61	182.353	94127.1	144750	34333.1	21646.9	2447.51	18077.6	15942.8	12937.8	27962.8	965.406	2569.88	45469.3	7872.82	14073.2
B+R	R7-R	M	SD	5278.02	39238.3	8624.66	1542.89	2791.64	2791.64	238.649	1021.19	449.548	532.797	2042.39	2630.69	527.247	76647.9	160346	34427.5	23484	5075.61	27129.8	21515.6	19757.7	27612.6	2321.16	2952.52	61668.7	9569.38	11042.5
B+R	R7-RL	M	SD	2488.93	24974.8	5439.72	915.173	2104.04	2300.76	196.719	1120.45	453.31	1505.33	2095.49	1975.75	102.636	121678	93733.1	19824.2	7652.48	3923.85	12991.6	16427.4	13382.1	19189.8	1268.91	2947.77	52366.8	9565.6	9956.03
B+R	R7-RR	M	SD	9542.77	121687	24429.5	3724.97	5422.93	8476.61	789.747	7344.64	2487.7	2553.51	13083.5	36815.4	868.721	158204	217550	44189.3	21001.3	8637.07	26310.1	40008.3	30614.8	42717.7	1540.37	6684.1	69866.7	17356.7	18030.6
B+R	R8-R	M	SD	512.401	2715.25	1460.58	186.763	148.453	43.0991	0	114.931	57.4655	38.3103	191.552	205.918	14.3664	22337.2	32671.8	9827.93	5557.9	496.147	2274.89	3652.49	2332.95	4576.16	184.736	1921.25	19830	3309.4	4507.55
B+R	R8-RL	M	SD	2198.6	16168.5	5224.1	865.82	583.699	223.751	19.4566	389.133	194.566	107.011	642.069	836.635	19.4566	154172	283754	58010.4	58054.3	8302.85	26913.1	30801.6	23090.3	36793.3	3012.25	9222.96	128114	19037.4	11150.8
B	B1-LL	F	HFHS	4217.72	18405.9	11249.7	1425.4	190.053	241.222	29.239	760.214	511.682	972.196	1089.15	1447.33	95.0267	115406	75182.3	12404.3	6682.87	2088.4	7069.03	8511.21	5059.44	10773	977.213	409.799	41161.1	6635.59	10867.6
B	B1-R	F	HFHS	2992.13	28057.3	11686.5	1557.38	331.096	245.256	110.365	1814.9	1692.27	2599.72	5506	4500.45	208.468	124771	81708.5	15913.6	6317.4	2694.03	5231.44	11392.2	6568.01	12697.5	1190.39	1514.09	64855.2	8416.24	5471.6
B	B2-RL	F	HFHS	3031.49	15515.4	12250.7	1849.27	141	124.731	178.961	791.768	878.537	786.345	1681.15	2744.07	65.0768	237996	182363	42561.1	20155.7	4106.41	13724.3	21418.6	6699.05	35368.6	878.152	3002.44	55097.8	9484.04	4307.13
B	B5-0	F	HFHS	2101.16	21469.9	10759.6	810.852	944.819	571.122	70.5088	253.832	246.781	676.885	980.073	1783.87	63.458	168411	80532.2	24740.6	11027.3	1254.02	2435.22	4676.27	2475.67	8980.39	663.416	2953.01	34109.3	9805.61	4724.82
B	B5-L	F	HFHS	2843.78	9683.9	11675.8	1008.48	964.631	576.273	106.485	626.384	588.801	1252.77	1979.37	4253.15	93.9576	137837	228192	77835.8	23976.7	1417.34	7322.94	10984.4	5669.38	31299.7	354.336	1535.46	39685.6	14645.9	5078.82
B	B5-R	F	HFHS	4999.41	34596.9	21058.6	3547.97	2105.02	1027.04	135.807	763.917	823.332	1884.33	1409	2826.49	152.783	235474	223174	52891	32845.6	3225.91	14922	15353.2	6124.04	36951.3	448.522	2173.6	63690.1	14145.7	9298.2
B	B6-0	F	HFHS	3683.14	22548.7	13472.9	3443.2	845.802	389.909	245.943	545.872	1157.73	1373.68	1823.57	2249.47	119.972	258905	136297	34760.7	9125.92	1866.29	9627.44	18243.6	11625.3	23711	633.06	1792.3	56408.1	9693.21	10720.9
B	B8-L	F	HFHS	582.14	2714.61	3437.69	674.057	91.9168	18.3834	0	91.9168	91.9168	55.1501	465.712	373.795	42.8945	38391.6	16402.1	1738.42	896.657	97.5954	1848.21	2958.36	1878.71	4684.58	97.5954	292.786	10107.2	1561.53	2043.4
B	B8-LL	F	HFHS	253.61	2984.79	1697.24	360.907	9.75423	9.75423	0	39.0169	97.5423	39.0169	234.102	292.627	0	130042	97704.9	19681.2	15491	1020.27	5444.06	9174.68	3512.55	16542.5	973.545	2087.28	30756.2	4392.63	4493.88
B	B8-R	F	HFHS	483.434	1577.52	2637.69	644.579	50.8878	50.8878	0	93.2943	161.145	50.8878	491.916	432.547	8.4813	196133	119781	23316.8	7909.6	1557.2	11889.1	15440.2	11304.1	26019.3	1260.59	2471.75	54798.7	7341.1	8288.6
B	B8-RL	F	HFHS	8089.25	31012.9	18461.1	1793.81	557.205	415.46	195.511	650.073	1295.26	713.614	3836.9	10366.9	381.246	294042	177244	33130.9	11701.1	1935.08	11919.7	33157.6	18156.7	37646.1	1359.35	3896.82	86183.1	13929.4	5560.03
B+C	C1-RRL	F	HFHS	12768.5	26846.5	19725.7	4010.61	409.246	409.246	491.095	1064.04	2209.93	491.095	1800.68	6220.54	736.643	45613.5	74133.1	20813.9	4074.22	2391.39	1948.54	2657.1	1328.55	4605.64	442.85	974.27	31796.6	8679.86	24533.9
B+C	C3-0	F	HFHS	3978.06	14746.7	13264.4	1583.62	1418.92	1431.59	88.6828	456.083	1393.59	684.125	2217.07	2153.73	228.042	212720	54546	17478.8	6787.13	1126.82	2738.44	4585.9	2214.33	5883.05	432.385	4048.69	23257.1	10390.3	16980.9
B+C	C3-RL	F	HFHS	3994.64	31890.8	12329	1287.31	1512.92	1632.36	159.255	318.51	1552.74	1101.51	2362.28	2110.13	132.712	154659	100897	29893.4	14394.5	1491.76	3448.49	5463.34	2576.68	9299.3	154.988	3525.98	33051.3	11934.1	18249.9
B+C	C5-L	F	HFHS	633.386	3388.61	1694.31	490.874	110.843	47.5039	15.8346	63.3386	221.685	31.6693	300.858	395.866	31.6693	77670.9	42499.7	9521.41	7611.47	240.511	2871.99	6522.09	2447.55	11572.8	297.102	3140.79	17514.9	5729.82	8615.96
B+C	C5-R	F	HFHS	4815.19	33252.6	11297.2	1731.61	916.737	722.278	175.939	1157.5	2898.37	5241.14	4333.67	9445.17	388.919	134414	92680.8	28383.7	10534.9	1701.12	4550.71	8091.11	6545.42	15085.6	1070.76	3384.97	31362.8	7633.45	14196.1
B+C	C5-RL	F	HFHS	264.51	1138.54	667.025	184.007	34.5013	23.0009	0	34.5013	80.5031	80.5031	207.008	241.509	11.5004	141846	44445	9417.81	4746.68	1019.84	2706.99	6056.1	4280.82	9077.86	516.217	3600.93	19779.9	7642.53	10525.8
B+C	C5-RR	F	HFHS	948.444	8574.98	2156.74	207.878	324.81	77.9543	25.9848	103.939	363.787	64.9619	1234.28	1104.35	25.9848	88309.2	35928.5	6317.42	5958.14	314.374	2125.77	3757.52	2170.68	8038.99	164.672	1272.47	10748.6	4326.39	10808.5
B+C	C7-0	F	HFHS	6531.83	19190.9	17822.8	1599.24	2736.05	2601.17	269.751	1290.95	1657.04	3949.93	3121.41	2158.01	289.019	244613	80949.1	20840.7	14752.4	1314.93	3836.71	10411.3	2503.77	14392.2	234.165	3242.29	30099.2	12807	17490.3
B+C	C7-L	F	HFHS	5955.43	45837.4	11358.6	895.553	1955.29	1835.88	194.037	776.146	1223.92	4268.8	4134.47	5194.21	582.11	291324	116809	34007.8	16487.1	2420.72	3375.92	15845.9	4017.08	21629.4	1086.05	2970.29	31901.1	11684.9	9251.07
B+C	C7-RR	F	HFHS	8424.59	51649.4	14117.5	1767.56	3558.07	3213.74	275.463	1698.69	2249.62	6886.58	3512.16	5440.4	826.39	474589	250706	64769.9	33164.8	7880.74	12683.1	34396.2	12313.7	33041.7	10712.9	4145.6	89294.6	20071.3	45150.1
B+R	R2-RL	F	HFHS	15761.6	32705.2	20321.6	6659.22	485.109	626.231	635.051	5565.52	4824.63	5230.35	12718.7	10540.1	599.771	533365	391818	72024	13811.9	21272.8	39271.8	83770.4	46999.7	59884.2	9695	13910.2	146844	34817.7	4608.64
B+R	R3-RR	F	HFHS	2875.6	8210.05	9908.32	2005.63	93.7696	109.398	218.796	859.555	296.937	510.524	1526.36	2250.47	104.188	149815	76118.6	17185.9	4823.99	2808.91	7232.59	13454.3	6744.09	13454.3	1105.92	990.58	40003.2	10075.4	2367.89
B+R	R4-0	F	HFHS	1649.26	14029.9	12261.2	1544.78	597.017	402.986	74.6271	343.285	500.002	589.554	917.913	2253.74	164.18	135535	78178.9	19082.3	5963.21	839.718	9249.06	8555.38	2932.93	8397.18	304.246	1776.79	37349.2	10320	6376.99
B+R	R4-L	F	HFHS	2893.81	37373.6	8131.61	1266.04	441.306	426.837	180.863	506.417	781.329	614.935	1823.1	2163.12	267.677	239560	136290	40548.6	13431.6	2368.62	9587.28	15631	5094.42	20199.1	554.559	2077.25	52786.5	13600.8	48632
B+R	R4-RR	F	HFHS	3113.03	25529.4	18615.7	2594.19	750.128	543.843	150.026	525.09	987.669	675.116	2369.16	2431.67	118.77	307297	290673	73345	45264.5	3154.86	31414.4	22911.9	9665.96	46495.1	1141.12	5884.6	82317.3	20607.3	11791.6
B+R	R5-L	F	HFHS	2868.27	15686.2	11360	1809.03	612.929	357.046	166.622	535.569	910.468	529.619	2273.19	2689.75	41.6554	263589	138342	32026.7	13281	1162.42	12305.6	17289.3	8911.9	23689.3	494.363	2618.79	57907.3	11597.5	4956.99
B+R	R5-LL	F	HFHS	4130.71	20126.3	13093.5	1973.46	594.939	295.051	169.291	575.591	1276.94	1112.49	1678.4	3966.26	183.802	184397	172943	46909.9	15309.8	1450.3	12388.8	20457.4	10739.3	28944.7	781.322	2767.82	59860.5	10167.4	7782.58
B	B1-L	M	HFHS	8396.27	42142.2	12164.5	4579.15	789.991	1754.76	223.714	5075.51	1670.87	1754.76	5187.37	9277.15	1013.7	115494	359644	64893	33052.5	12917.7	71345.1	55455.3	78122.1	32856.1	8205.57	2037.85	121757	18895.8	13533.8
B	B1-RL	M	HFHS	7397.55	53508.5	10608.7	2693.43	570.197	892.808	622.715	3901.35	1350.47	1800.62	5221.8	6152.12	562.694	63442.5	178710	32934.6	13437.4	7126.65	31295.9	30633.4	31254	17642.3	5236.9	2733.51	108859	16275.5	6854.69
B	B1-RR	M	HFHS	5902.94	9002.27	8552.75	2294.93	597.391	1206.61	65.0624	1218.44	555.988	786.664	3992.47	1727.11	218.846	33333.8	116545	22690.6	10718.7	4805.15	19472.5	15719.1	20990.3	10164.5	5699.43	862.786	86681.6	11883.8	7210.88
B	B2-0	M	HFHS	4864.02	21833.5	8635.94	2301.8	571.249	520.845	176.415	3561.91	672.058	310.827	4586.79	2276.6	151.213	140115	193446	47628	24824	7668.38	25801.9	21917.5	20912.1	19787.9	1553.78	4597.37	76519.2	11086.7	4716.19
B	B2-L	M	HFHS	5811.08	23842.7	8622.24	1654.57	522.073	634.52	1481.88	7658.41	2281.06	807.205	6184.56	4738.82	1469.84	176614	271101	48670.9	21828.3	11998.3	48264.4	38913.2	57217.9	23201.6	3731.41	5682.94	132813	15783.9	5990.13
B	B2-R	M	HFHS	4957.4	46437.7	12363.2	1881.79	2539.4	1993.08	192.226	1598.51	809.372	445.155	2256.12	3520.77	222.577	114050	183975	42247.7	29126.5	8074.04	24786.1	21166.7	17104.7	19303.5	1492.02	5118.56	64956.4	11914.7	3305.29
B	B5-RL	M	HFHS	3708.43	9310.7	10599.7	2073.22	1872.99	1430.81	250.288	2882.48	1993.96	717.492	2828.25	3908.66	95.9436	94839.7	232804	41526.5	25525	8699.03	37816.4	29319.3	38649.3	22075.7	3011.85	4635.56	90692.1	16447.4	8606.49
B	B5-RR	M	HFHS	5027.91	15238.2	7866.98	1989.28	4062.24	3302.59	199.571	3051.51	1487.13	869.101	2607.3	2703.87	199.571	79710	144689	31531.9	15756.3	7486.41	15050.2	10349.4	14450.5	11190.9	7805.6	4623.39	44434.9	11307	7912
B	B6-R	M	HFHS	4511.4	11377.5	7580.29	3005.24	1449.59	664.689	148.494	1046.53	806.113	827.326	1484.94	2467.84	282.847	126956	75274.8	18833	5028.51	3747.49	9712.87	8355.36	11032.1	7647.93	2504.7	5602.11	52770.7	9158.4	11682.2
B	B8-0	M	HFHS	343.836	1153.51	554.574	70.246	85.0346	18.4858	11.0915	192.252	73.9431	25.8801	236.618	125.703	7.39431	11290.8	13747.6	2341.65	556.621	374.279	1588.29	1362.76	2533.58	1799.42	705.373	340.69	7274.46	940.497	1737.04
B+C	C1-LL	M	HFHS	15108.6	41123.8	12068.2	3718.69	1372.09	1754.1	116.94	3438.03	4326.77	935.519	3913.59	7990.89	483.351	85975.3	140760	29591.5	16595.2	4413.02	15888.3	15752.6	12624.9	14046	7412.16	3634.67	57926.2	8975.99	9982.85
B+C	C1-LLR	M	HFHS	19006.4	73448.6	21535.9	4462.28	1562.99	1539.13	334.074	3973.1	5464.5	1097.67	12611.3	6645.69	1527.2	124941	227086	58066.1	23751.5	6993.58	21888.2	19952.3	18827	26885.3	3992.87	6812.08	74594.1	15911	10805
B+C	C1-R	M	HFHS	13100.1	65010.1	16569.6	2500.39	418.726	777.633	191.417	5180.23	4259.04	1256.18	5419.5	6891.03	370.871	142022	193846	49825.1	22745.2	5394.31	16532.1	15388.2	13124.5	21107.6	2925.93	5382.27	82130.8	13570.1	9114.94
B+C	C3-L	M	HFHS	8333.92	12189.8	9722.91	2777.97	5418.5	4297.18	289.372	3335.02	3385.66	2712.87	2987.77	3624.39	853.648	90836.9	123907	33112.5	14542.4	7970.75	14902.8	7907.16	12358.9	9772.65	1483.92	6444.44	42143.2	13652	7525.58
B+C	C3-R	M	HFHS	13311.3	77745.4	13263	3070.59	5867.88	6446.63	112.535	3295.66	5755.35	3231.36	6221.56	8424.03	852.049	146749	156911	37895.6	14669.8	7411.75	14738.1	15165.1	13815.9	16514.2	2015.18	9956.34	67474.3	20339.6	22064.5
B+C	C3-RR	M	HFHS	9853.65	42681.8	11841	2330.75	4942.43	4390.96	301.748	2049.81	2174.67	1165.37	2798.98	4245.29	301.748	135449	164094	45958.5	20001.7	6451.28	18099.4	15342.5	10448.9	15935.2	1998.79	9745.84	53043.8	16004.1	20801.2
B+C	C7-LL	M	HFHS	16817.7	29762.1	20450.2	1525.23	6060.79	5679.49	361.239	3391.64	1745.99	3793.01	3331.43	6040.72	923.167	308313	210774	49771.1	33303.3	5642.44	17239.8	23599	10715.1	29903.1	1029.24	8730.16	69253.1	14317.5	39056
B+C	C7-R	M	HFHS	32072.3	58634.1	31878.5	3508.58	12441.5	15132.1	452.025	6974.1	2991.98	6242.25	6780.38	8459.33	4950.75	348732	216310	54556.6	32473.2	4464.08	19555	31307.8	15782.3	33638.6	355.546	25066	111641	24552.4	25125.3
B+C	C7-RL	M	HFHS	22525.5	65588	13817	2965.69	9291.35	12377	548.567	5605.67	6188.52	20279.8	11074.2	14039.9	5537.1	324360	240155	65249.4	30963	10905.5	17218.4	34169.5	22429	32532.9	4826.49	22829.8	106433	25468.5	34453.4
B+R	R2-0	M	HFHS	7663.15	27368.4	11579.6	2891.98	585.42	673.234	216.606	1861.64	643.963	409.794	1832.37	3073.46	251.731	133236	223962	36076.5	27730.6	9188.71	35305.6	37453.7	29354.5	28100.6	3659.04	3926.27	84846.5	19744.4	13618.6
B+R	R3-R	M	HFHS	7287.14	36321.1	12424.3	2572.97	713.734	1330.54	88.1153	1656.57	299.592	502.257	2097.14	5286.92	290.781	84497.3	110337	17682.9	18795.6	3696.58	14942.7	11053	10501.2	10133.4	1811.51	2390.83	64763.8	12726.5	1627.6
B+R	R3-RL	M	HFHS	8257.88	26632.7	17532.8	5664.66	909.31	2088.05	195.333	7974.99	1845.56	956.459	6627.86	3657.45	276.161	106576	349438	52844.4	32144.6	7814.36	67277.7	54870.4	69744.1	28319.2	6065.25	3932.35	255131	37530.3	3183.63
B+R	R4-RL	M	HFHS	11431.9	58763.7	19525	4492.92	7584.99	4209.85	246.784	3273.52	2039.6	1517	3309.81	9544.74	667.769	109777	230965	47792.3	43343.3	8271.61	33058.3	26912.7	21541.4	26905.6	2668.04	11059.3	83173.7	16930.4	15367.6
B+R	R4-RRL	M	HFHS	10455.1	28061.9	15675.7	4593.07	4834.45	3227.56	68.965	1924.12	1675.85	820.684	2406.88	5158.58	420.687	78829.2	188317	36877.8	28267.2	6813.11	28441.1	24577.9	20134.9	18881	1956.96	8806.31	71356.5	14590.2	11930.2
B+R	R5-0	M	HFHS	6913.74	32143.9	10200.9	2516.66	4248.63	2502.52	134.316	2877.19	1852.15	883.658	3237.72	3258.93	452.433	81350.4	194121	45396.5	28838.2	4443.57	26646.4	17489.1	23448.9	18960.3	2642.13	4158.34	80014.4	13045.5	11123.9
B+R	R5-R	M	HFHS	6771	14452.3	8647.98	2358.15	2319.13	1816.29	112.705	2423.17	1534.53	1127.05	2180.42	3385.5	320.777	107962	235344	46311	29341.1	6379.91	44886	32968.2	44540.6	23177.1	3530	4026.57	116328	18373.3	13785.3
B+R	R5-RL	M	HFHS	5453.32	20006	10775.9	3447.76	2830.32	2632.02	90.1376	2798.77	2059.64	739.128	3150.31	2005.56	279.426	100053	226836	45556.8	22936.5	6844.19	38778.8	25921.2	34088.6	23693.7	4440.27	5645.9	80726.1	14305.9	12798.9
B	B3-R.2	F	SD	680.728	19108.1	5386.11	758.355	191.081	423.962	107.483	161.225	179.139	346.335	603.101	895.694	35.8278	31519.9	44608.9	7734.14	4450.4	943.827	13757.6	5086.18	2287.47	5020.63	281.837	419.479	10972	4044.04	1625.48
B	B4-L.2	F	SD	1502.02	20124.6	10282.1	1343.27	781.539	903.655	366.346	158.75	793.751	1953.85	1795.1	1221.15	61.0577	86223.4	106647	36165.3	14716.6	1949.88	2723.11	8085.29	1991.91	18288.5	235.331	2437.35	24213.8	9858.67	3773.69
B	B6-L.2	F	SD	2031	13340	17702	2377.19	1730.96	1546.33	184.636	530.829	1084.74	1153.98	2261.79	1477.09	184.636	107590	108487	40429	18120.4	1837.68	940.209	6004.52	1581.26	10449.1	534.21	3953.15	34381.7	15769.9	5128.41
B	B6-LL.2	F	SD	2613.54	12984.6	10365.1	1294.89	588.047	991.959	516.769	849.402	1675.04	5957.69	6765.51	3950.01	136.617	83597.1	85576.7	29490.9	6841.1	3126.76	3217.69	10037.8	5959.73	13633.2	734.474	1734.76	25105	9352.3	2462.24
B	B6-R.2	F	SD	231.688	688.63	804.474	109.408	64.3579	154.459	64.3579	90.1011	96.5369	199.51	328.225	308.918	25.7432	4316.8	4553.42	1835.44	473.249	211.044	19.1858	364.53	147.091	281.391	57.5573	211.044	2494.15	1131.96	869.755
B	B7-0.2	F	SD	2075.53	21093.1	10445.2	1142.16	1565.86	3432.61	300.891	405.281	233.344	1430.77	3358.92	1780.78	184.219	92438.2	92941.5	25535.4	12042.4	333.071	9747.87	9888.5	3086.45	19540.1	310.866	2316.69	20228.5	10510.2	4448.34
B	B7-RL.2	F	SD	2274.86	29342.4	9712.65	1503.38	1727.57	2512.23	257.158	375.846	665.973	1147.32	3165.02	1351.73	224.189	145924	98534.8	20189.7	13766.8	31.7572	7597.92	13298.3	3199.54	26263.2	31.7572	3056.63	33178.4	9082.57	4080.8
B+M	M1-R	F	SD	625.939	2016.92	2225.56	476.906	238.453	228.518	49.6777	129.162	39.7422	139.098	288.131	1112.78	19.8711	35053.2	92989.7	18728.9	8142.59	1945.23	13313.6	18122.9	9511.09	13489.5	449.651	889.526	31817.7	13518.8	6744.76
B+M	M4-0	F	SD	1631.8	9218.48	11526.6	435.146	288.521	227.033	255.412	591.232	75.6776	184.464	2497.36	2577.77	132.436	93209.2	112426	18201.6	4195.7	3069.78	11688.4	31783.3	20988.6	27900.6	822.983	1297.59	58982.1	14803.6	4518.83
B+M	M6-0	F	SD	2020.5	15549.6	7550.28	968.894	886.183	1335.18	189.052	389.921	437.184	1323.37	1784.18	2812.15	11.8158	59995.8	101019	24559.5	9702.66	3263.06	12174.7	19652.5	3250.7	29305.7	469.683	679.804	14807.4	6686.8	2459.66
B+M	M6-LL	F	SD	858.98	25275.5	10554.7	1331.42	268.431	279.169	118.11	161.059	654.972	762.345	2233.35	697.921	21.4745	61613.3	82727	23802.9	9169.09	1673.98	10259.9	11426.3	907.189	14990.2	269.997	637.192	12679	5918.33	1749.58
B+M	M6-LLR	F	SD	3215.9	8036.11	6714.91	1197.79	493.636	725.936	210.521	326.671	428.302	936.457	1822.1	3665.98	108.89	48955.7	102551	24364.1	5322.33	2302.66	21151.4	18607.5	9052.09	19558.9	386.075	1268.53	21696.1	9286.49	2061.37
B+M	M6-RL	F	SD	1499.19	21308.9	6899.19	669.542	305.66	269.272	138.275	523.989	1142.59	785.984	2314.29	1564.69	58.221	37222.8	59318.8	9453.29	2074.31	1320.02	20325	7223.2	2353.07	8682.59	787.091	828.085	13224.8	6673.87	2172.7
B+M	M6-RR	F	SD	1001.2	10153.1	6081.13	550.998	322.535	188.145	181.426	450.205	248.621	732.424	1888.17	839.935	20.1584	37161.4	50410.6	8681.63	3627.14	1421.75	12381.5	9370.12	3464.82	10109	755.655	811.629	14872.4	7069.57	1567.28
B+M	M6-RRL	F	SD	576.465	2926.67	3414.45	298.311	245.905	423.279	88.687	68.5309	112.874	205.593	467.622	221.717	12.0937	13511.8	21036	4848.06	1822.49	778.23	2783.36	3232.04	329.557	5415.85	47.6467	476.467	5197.47	2422.04	1286.46
B	B1-RL.2	F	HFHS	5889.84	27243.5	21232.5	3865.96	1042.23	775.616	375.689	605.95	848.33	1684.54	4556.75	3987.15	133.309	365376	320675	52941.3	36336.7	4622.16	28875.9	37052.6	16152.4	58354.7	2951.65	3655.02	72937.1	27871.1	12610.4
B	B2-0.2	F	HFHS	5712.17	33524.2	33541.6	4649.85	1602.19	1846.01	557.285	1236.48	835.927	3395.95	5224.55	5329.04	243.812	379089	251993	55776.4	25610	2359.29	27969.2	35515.4	17379.5	49112.8	1530.83	3241.77	79567.4	30058.4	7744.22
B	B2-L.2	F	HFHS	1280.56	11389.2	6305.77	1804.42	562.668	601.473	252.231	329.84	291.035	717.887	1008.92	892.509	58.2071	72781.4	37524	5216.41	4409.11	543.376	11426.4	5325.09	1490.4	3834.68	543.376	714.152	12420	6939.69	1366.2
B	B2-R.2	F	HFHS	1152.9	859.432	3430.74	593.916	433.209	768.597	146.732	139.745	230.579	600.903	1320.59	922.317	6.98725	37423	26948.5	4111.99	1154.47	298.346	7218.68	6167.98	2140.31	4144.42	239.974	356.718	8788.24	3184.52	1102.58
B	B2-RL.2	F	HFHS	417.763	2351.6	2526.8	485.145	202.144	417.763	141.501	121.286	208.882	397.549	1057.88	505.359	80.8574	22326	13075.1	1474.64	914.275	309.674	4522.22	2030.08	845.459	1253.44	339.167	496.461	4861.39	2079.24	825.797
B	B5-0.2	F	HFHS	604.844	3561.48	3017.46	283.837	192.604	165.572	81.0964	87.8544	310.87	405.482	949.504	780.553	23.6531	44489.6	54173.5	16522.6	12847.8	612.466	829.454	4084.28	997.445	6604.14	290.484	829.454	11052.4	4199.77	1581.91
B	B5-LL.2	F	HFHS	819.673	5638.08	5053.89	561.544	452.858	353.229	72.4572	95.1001	226.429	403.043	584.187	615.887	36.2286	51268.5	66355.1	16085.8	15882.4	897.586	1684.63	5403.21	1246.89	10090.1	260.875	1127.51	14626.7	5633.13	3749.52
B	B8-0.2	F	HFHS	2809.87	8102.35	10799.4	1467	1568.56	3656.21	519.092	541.661	541.661	1523.42	3904.48	2787.3	146.7	144675	118299	15044.4	13665.7	120.936	8973.42	31733.5	9348.32	35651.8	435.368	2721.05	29846.9	11597.7	7437.54
B	B8-R.2	F	HFHS	2853.52	30691.8	15845.6	2340.67	2143.43	3405.81	289.297	565.444	828.441	2209.18	3340.06	2445.87	249.847	176262	141536	27437	21450.8	110.857	9450.53	21921.9	7385.82	41017	235.57	2314.13	40462.7	10268.1	7233.4
B+M	M2-L	F	HFHS	1250.96	2298.14	2117.01	464.156	237.739	583.026	96.2275	232.078	175.474	526.421	1115.11	1103.79	90.5671	66636.1	116397	26039	6049.7	4522.37	21889.2	22068	14699.6	18611	1981.8	4120.05	38086.3	11354.4	22380.9
B+M	M3-0	F	HFHS	738.454	7377	3639.52	195.916	226.057	278.804	97.9582	90.4229	30.141	113.029	527.467	806.271	30.141	21022.9	26508.6	4632.17	3090.87	497.191	6455.2	3604.64	555.197	3637.78	439.186	853.512	6231.47	2958.29	1334.13
B+M	M3-L	F	HFHS	2451.82	20670.1	16327.2	890.573	604.71	296.858	373.821	450.784	175.916	681.673	2858.63	3243.45	109.947	117849	179254	42709.7	17581.8	6745.69	27373.3	28320.2	5544.94	34665.6	2352.69	4461.33	33377	16176	13110.7
B+M	M3-RL	F	HFHS	1209.79	7493.34	7537.34	461.919	205.297	344.606	102.649	212.629	29.3282	307.946	1833.01	1481.07	65.9884	50811.6	74565.9	12944.4	6807.99	1959.6	15042	14030	4268.8	11693.2	864.799	1674.4	21500.4	9061.99	2134.4
B+M	M3-RRL	F	HFHS	2994.5	10829.7	15456.6	844.314	754.254	911.86	292.696	765.512	112.575	348.983	2949.47	3647.44	146.348	177576	168212	38664.6	13347.2	3363.85	19917.5	18786.4	11301.3	28779.6	954.074	4583.49	52926.5	18501.2	4553.98
B+M	M5-L	F	HFHS	2085.02	9786.27	11660.7	905.616	168.487	182.527	308.892	358.034	140.406	322.933	4380.65	2955.54	140.406	125662	160702	24920.4	14489.1	4166.71	25072.9	34938	16623.3	36172	2765.71	3128.66	57840.4	19374.5	4428.04
B+M	M5-RL	F	HFHS	1251.09	8599.74	6117.3	418.344	126.293	71.0396	138.133	221.012	35.5198	51.3064	828.796	1203.73	55.253	63867.7	80097.6	16237.8	7927.7	1055.7	16468.9	8907.7	4394.09	12469.2	908.299	892.364	18787.4	9106.89	3445.96
B+M	M5-RR	F	HFHS	314.146	177.064	988.131	148.505	108.523	39.9822	22.847	68.5409	5.71174	68.5409	239.893	342.705	28.5587	6946.73	3901.73	892.856	247.729	87.7373	345.788	727.703	190.958	531.585	196.119	149.669	3215.31	1667.01	1207.68
B+M	M9-LL	F	HFHS	3547.51	27443.6	5960.25	1002.56	1410.19	2891.99	352.547	842.808	1068.66	2302.57	6874.67	4153.45	231.359	131996	84643.2	10437.2	11101.5	511.555	6871.63	23279.5	10360.9	27494.1	626.082	1962.23	37183.1	12078.8	2657.03
B+M	M9-RL	F	HFHS	2410.12	16028.8	6426.98	1259.13	1282.31	3051.27	471.209	741.575	2039.33	2904.5	6550.58	5948.05	239.467	118789	76742	16461.1	6087.68	279.976	6281.51	16066.3	5836.42	28586.2	251.26	1981.37	24343.5	8169.55	2562.85
B	B3-0.2	M	SD	2113.12	12466	6117.19	1158.2	742.194	1597.84	132.366	633.465	137.093	260.004	1451.3	832.013	104.002	31573.7	55751.4	9534.61	8537	1811.75	9356.87	7189.66	5039.64	8674.6	521.737	1874.81	20548.4	5033.91	6960.32
B	B3-L.2	M	SD	3702.67	6121.18	6399.41	1134.34	64.2082	535.068	42.8054	1112.94	64.2082	192.624	1605.2	2397.1	492.262	46894.7	68681.3	25742.3	5993.95	2551.58	8938.08	9511.81	8152.98	6492.19	649.219	2838.45	28127.8	11082	6431.8
B	B3-RL.2	M	SD	817.179	3817.02	1755.62	347.96	416.498	669.559	57.9933	253.062	68.5376	168.708	432.314	448.13	15.8164	6968.92	15200.2	2397.91	1815.72	1002.97	3717.91	2173.11	806.989	2611.19	743.583	513.014	5095.56	2144.28	2346.03
B	B4-0.2	M	SD	1286.47	10464.6	3356.35	1597.53	1240.39	1793.38	130.568	218.893	261.135	453.146	648.997	518.43	107.526	12074.9	42487.3	9828.44	8132.03	1284.81	3208.19	2965.84	2431.15	3969.85	1719.5	1769.5	11532.6	4273.74	8143.57
B	B4-R.2	M	SD	350.68	1676.33	1190.77	312.144	473.997	639.703	34.6827	61.6581	46.2436	65.5117	173.413	258.193	88.6335	2245.39	4860.99	1392.3	933.567	249.488	189.128	253.512	164.984	193.152	88.5279	342.04	1947.61	881.255	3597.45
B	B6-0.2	M	SD	4989.06	28288.3	11764.5	1492.89	2832.66	4759.38	242.435	1850.16	484.87	433.831	2845.42	4465.91	1671.53	72736.4	197912	41264.7	32695.8	5909.99	21204.9	21770.9	18309.1	23771.6	4409.46	4133.05	82937.4	22442.2	7568.48
B	B6-RL.2	M	SD	3546.6	39671.1	9877.03	1858.06	880.132	1421.25	306.416	1382.13	339.014	247.741	2633.88	3422.73	951.846	51038.3	126163	31443.1	24904.3	2855.1	11040.4	13990.5	10211.9	12998.4	2105.7	3984.48	59862.2	14455	9488.87
B	B6-RR.2	M	SD	8591.28	62059.8	19886.3	4499.2	5563.98	6618.32	866.436	3350.91	2620.18	1127.41	8319.87	5209.05	1565.85	108987	220964	49737.4	48479.1	6885.32	19297	23464.4	16800.6	24018.1	5335.11	9874.99	96837.4	23786.6	19125.9
B	B6-RRL.2	M	SD	1886.73	11916.2	6342.91	1340.57	844.066	1166.8	124.127	757.177	155.159	515.128	1098.53	2116.37	142.746	25053.3	51158.7	11591.1	8990.73	1470.56	4644.81	6252.86	3778.02	6641.42	771.146	1548.27	27898.7	8500.54	4638.83
B	B7-L.2	M	SD	4402.33	26403.9	10215	1621.91	3455.37	5167.95	342.515	2669.6	725.326	2699.82	3455.37	3586.33	3334.48	93597.8	137303	18844.4	22295.5	1282.78	23033.3	20955.9	17050.8	22057.1	1169.26	4677.05	62992.6	14144.7	8434.58
B	B7-R.2	M	SD	6114.35	31557.6	9060.75	3865.77	3057.17	6468.8	819.677	3245.48	1517.51	6058.96	7642.93	3068.25	3500.24	136978	220690	28732.8	35232.4	2808.65	39271.4	40365	37469.4	33890.2	2845.93	9768.14	116857	23997.8	10588.4
B	B7-RR.2	M	SD	3164.82	16884.8	6793.34	1559.22	2208.42	3425.65	307.207	1385.33	405.746	1211.44	2950.35	1025.96	2289.56	52933.6	79972.7	10874.4	15089.6	734.759	14478.6	13728.4	11346.2	11709.7	425.387	4106.92	41718.8	10348.5	5398.55
B+M	M1-0	M	SD	3007.29	17241.8	8599.81	1962.66	1698.86	2173.69	232.142	612.011	274.35	348.213	1202.92	1287.33	337.661	50484.4	179956	37271.5	16989.5	4153.24	38315.2	24177	23208.6	21723.8	1420.28	6541.89	76512.1	15698.4	15278.7
B+M	M1-L	M	SD	2010.1	10371.9	5856.85	989.746	704.046	1229.53	71.425	581.604	188.766	673.436	1214.22	1362.18	96.9339	40803.8	127745	29187.8	13488.3	3775.51	19579.7	16543.2	17177.6	15028.1	2592.97	5703.29	56176.8	12533.7	24186.6
B+M	M1-RL	M	SD	1547.67	9877.31	4411.62	966.65	539.884	591.302	169.678	323.93	92.5516	200.528	539.884	668.428	138.827	13827	39617	9181.66	4398.71	1456.68	6704.16	4152.11	3148.49	3939.91	992.147	1628.73	16522.4	4943.53	6188.01
B+M	M1-RR	M	SD	153.638	1075.47	567.28	94.5466	94.5466	183.184	17.7275	35.455	23.6367	11.8183	70.91	106.365	0	17024.9	29661.8	6763.59	3281.71	974.505	4171.93	3102.61	2828.7	3176.36	832.28	1032.45	13290.1	3887.48	3223.77
B+M	M4-L	M	SD	1982.06	9446.71	8042.47	161.252	215.003	409.85	181.409	1081.74	20.1566	60.4697	1310.18	913.764	376.256	36447.3	106323	22727.6	7194.26	4247.87	22950.5	13665.5	15292.3	13496.8	2874.09	1843.75	54692	11466.2	7134
B+M	M4-R	M	SD	1633.34	9517.35	4863.38	219.873	251.283	481.626	136.112	638.678	62.8208	36.6455	884.727	1439.64	397.865	22194.2	56247.8	9337.27	3575.74	3317.92	10503	7829.63	8956.16	7695.12	2062.49	818.272	43536.6	8535.81	6282.76
B+M	M6-L	M	SD	1641.52	13106.8	4218.03	681.146	879.99	655.762	105.768	482.302	164.998	241.151	1023.83	714.992	33.8458	16454.5	28875.3	6763.06	2876	1100.11	5112.9	3876.58	2257.85	5144.33	445.283	937.714	11362.6	3703.71	3939.45
B+M	M6-R	M	SD	5098.89	21551.9	9305.47	1502.35	1520.56	3123.07	355.101	1739.08	518.994	418.837	3259.65	2513.02	355.101	50984	148880	37077.1	26740.9	4408.53	27132.5	17164.3	12661.8	18581.6	759.552	5622.25	51845.3	14736.9	3053.87
B+M	M9-0	M	SD	3689.15	25541.5	7477.6	2146.28	1909.5	4116.88	504.108	3200.32	1160.98	3574.58	5812.52	1909.5	2917.72	87750.4	108767	13835.9	16295.8	1233.63	17751	20713.2	16207.1	19516.5	1189.31	3833.86	58165.4	13377.9	5399.91
B+M	M9-L	M	SD	3780.32	32790.1	9098.58	1314.89	2218.88	3862.5	915.729	6656.64	2923.29	4895.63	12726.3	2113.22	2747.19	156575	107463	19906.7	15204	639.206	11155.7	14549.5	11094.8	16969.4	623.987	8157.48	73463	17334.7	5144.08
B+M	M9-R	M	SD	6905.73	38941.6	7394.18	3351.8	1044.28	2762.29	808.475	5423.52	1431.68	3116	6181.47	9280.62	4311.87	173639	173471	30793.3	26517.8	2377.95	30409	34732.5	32786.9	28343.3	1393.15	13979.5	121780	31441.8	12826.5
B+M	M9-RR	M	SD	1612.02	22466.7	3454.99	568.133	1030.03	1602.78	290.995	517.324	314.09	1515.02	1441.12	1163.98	789.844	30749.2	40255	8453.26	6091.08	130.552	4075.68	5936.05	2863.99	8045.29	146.871	1990.92	15943.7	3590.19	2896.63
B	B1-0.2	M	HFHS	5158.13	8297.41	5299.44	1478.8	1867.42	1993.6	222.072	2266.14	519.85	706.593	2967.69	5511.42	706.593	60216.6	96135.7	14990.3	9340.71	2611.38	12814.2	13249.4	16174.7	16007.3	1293.14	1406.13	42531.2	10219.5	9449.52
B	B1-R.2	M	HFHS	17681.6	106090	13076.3	4371.75	9236.46	11091.5	1906.97	5059.3	2905.85	2114.53	6641.95	14062.3	1971.83	40088.7	213119	36101.7	34984	10785.6	27540.1	23403.3	22746.5	24889.8	4908.82	7340.18	44294.6	16316.6	11569.1
B	B1-RR.2	M	HFHS	1874.06	3999.05	5600.81	1313.44	1222.67	1724.56	202.889	2957.91	630.025	587.311	2776.38	2028.89	117.462	48100.5	56711.2	9113.03	6041.86	1459.04	8892.97	7543.96	8438.52	6979.48	1042.86	2516.25	27056.8	10112.8	5018.14
B	B5-R.2	M	HFHS	1496.74	7158.97	3002.75	804.031	1184.4	1277.17	80.4031	745.275	352.537	445.31	1366.85	1069.98	117.512	19239.2	50744.8	9209.15	9314.47	1703.68	5925.7	5730.55	5278.3	5860.65	2846.69	2075.39	14732.2	4138.39	6901.44
B	B5-RL.2	M	HFHS	1552.68	3661.73	3144.17	1067.47	1022.18	2115.52	135.859	1475.04	485.212	1028.65	2024.95	841.034	148.798	22420.6	37292.9	6219.49	3954.22	1961.1	4770.68	4738.66	6155.45	3465.94	1320.74	1520.85	19010.7	5475.07	4618.59
B	B5-RR.2	M	HFHS	5840.81	37491	10512	3444.58	2439.02	2624.44	256.739	2681.49	1326.48	1347.88	4549.98	3950.92	370.845	77001.1	194861	30893.8	35498.1	5103.36	29758.8	20445.6	26458.6	18827.7	12154.7	5409.23	61666.9	13088.4	11390
B	B5-RRL.2	M	HFHS	5930.58	46881.4	16422.3	5334.21	3180.65	4042.07	706.811	2860.37	2495.92	7123.33	9276.89	6272.94	386.537	99892.3	222406	44847.8	39140.3	5477.01	27703.3	28098.5	22588.5	30809.5	4181.84	8594.18	77929.4	20075	19537.2
B	B8-L.2	M	HFHS	5462.6	8537.23	8260.51	2285.48	4345.48	4581.2	512.439	2654.43	522.688	1475.82	4079.01	2428.96	676.419	70847.6	62953	7762.81	9451.94	287.511	12285.1	10643.9	9320.16	12045.5	407.308	2605.57	31530.4	8954.78	9206.35
B	B8-LL.2	M	HFHS	3572.42	9450.19	6036.16	1504.64	1865.4	3308.45	395.958	2578.12	774.317	1504.64	3748.4	4452.33	554.341	65191.3	93882.3	12706.9	11001.3	767.53	17385.2	20991.3	19078.6	17896.9	1023.37	2802.09	41775.6	11171.8	8954.52
B	B8-RL.2	M	HFHS	6978.47	37921.3	11898	2682.51	4484.04	7334.82	405.84	7027.97	1504.58	1692.65	10868.6	4028.71	1395.69	142314	153888	12952.1	20117.4	1537.85	30825.4	33308.7	27396.5	25368.8	4169.29	6584.28	86677.8	25243.5	9944.77
B	B8-RR.2	M	HFHS	6386.43	29549	8110.2	2081.71	3645.35	5679.96	442.717	9466.6	1394.09	2722.24	8731.88	5425.64	1233.96	117585	171137	20112.8	25811	960.366	32981.7	30942.1	32295.7	30429.9	1006.1	6301.83	78146.3	13737.8	12923.8
B+M	M2-R	M	HFHS	1283.19	1977.88	3438.07	862.836	712.392	1000	141.594	924.783	146.018	477.878	840.712	769.915	163.718	30643.4	93429	17182.1	6600.29	2441.04	18479.6	12146	19889.7	13076.2	1741.91	2162.57	52126.9	11162.4	4378.47
B+M	M2-RL	M	HFHS	977.014	1238.05	1499.08	387.822	275.951	305.783	119.33	357.99	59.665	37.2906	298.325	290.867	44.7487	30867.7	119098	20544.7	13589.5	2717.91	20814.8	11935.2	19979.2	14788.1	5486.46	2591.3	43292.4	9107.52	19810.3
B+M	M3-LL	M	HFHS	4305.16	18048.2	7297.87	769.077	1354.24	2474.42	342.741	2466.06	292.584	259.145	4388.75	3686.55	259.145	63068.5	143494	20805.1	13503.5	6135.68	30620.5	21011.8	25047.1	18969.3	2381.5	3969.17	60926.8	10518.3	11593.3
B+M	M3-LLR	M	HFHS	5254.21	7390.71	9843.73	633.037	1962.42	1883.29	229.476	1463.9	94.9556	142.433	2500.5	2001.98	395.648	38977.2	91761	19484.9	9495.28	3460.76	14213.8	12897.9	11138.4	14533.7	1359.58	2181.15	42619.7	11414.7	12359.9
B+M	M3-R	M	HFHS	5985.26	31923.9	11630	1044.2	2761.85	3397.45	378.335	2845.08	279.968	317.801	5727.99	4237.35	431.302	92289.7	213055	32890	31407.3	6829.62	32744	23510.5	22926.4	31542.1	1853.43	6391.53	81191.6	13850.2	15557.6
B+M	M3-RR	M	HFHS	7305.84	23376.5	11375.6	1107.94	745.942	2172.01	526.547	3828.44	351.032	120.667	6702.51	4080.74	383.941	84912.2	201094	39017.8	19932.9	9571.5	37589.1	28261.5	27309	18864.2	6772.07	8142.75	84505.7	17330.9	10756.3
B+M	M5-0	M	HFHS	1216.28	2032.8	2589.9	55.2852	395.502	501.82	63.7907	914.333	46.7798	29.769	1573.5	744.224	76.5488	19622.1	38897.7	6860.78	2844.71	2016	6872.73	6091.83	6051.99	5036.02	1617.58	1545.87	18295.4	6649.61	3840.76
B+M	M5-R	M	HFHS	2050.49	6665.71	2883.7	273.398	631.42	1393.03	97.6423	690.006	52.0759	358.022	872.271	2180.68	136.699	16330.9	41138.7	8309.77	3577.61	2893.99	6015.85	8188.24	6912.15	6517.17	1184.94	1716.64	16019.5	5681.64	3250.99
B+M	M7-0	M	HFHS	8457.31	17629.5	15011.5	3889.81	2896.47	4938.85	844.803	11957.2	2255.9	8522.29	22382.6	6786.27	909.787	156770	242037	31973.1	18233.2	12943.6	40602.2	44039.2	56243.4	33468.1	12309.8	11928	89841.5	28324.8	8328.44
B+M	M7-L	M	HFHS	3446.07	5817.49	8074.27	1712.29	1791.1	2034.69	164.781	2794.11	480.014	866.891	4012.06	1088.99	250.754	72548.8	110836	16015.5	8930.77	3362.76	19842.3	16299.9	21344.1	13281.4	1451.87	3023.49	51359.4	15062.6	5044.14
B+M	M7-R	M	HFHS	5171.98	10882.8	8605.15	2299.89	1972.13	2460.99	272.209	4194.25	816.628	1577.7	4249.8	4310.91	327.762	92974.7	164294	22433.3	18803	3685.87	27487.5	26906.8	37772.6	21711.3	2065.1	3413.21	72717.6	14728.3	4034.26
B+M	M7-RL	M	HFHS	4247.62	4981.3	8881.39	2796.81	1208.09	3613.23	844.008	9162.72	1831.44	1577.69	8616.6	1180.51	347.533	86173.1	105421	18135.9	9825.35	3637.05	16837.5	17027.3	21799.5	10975.7	2369.02	4457.1	43071.3	14320.4	5808.65

## Sheet: Spleen_Immune
diet	mouse	sex	Colonization	gdTcells	Bcells	ILC2	ILC3	ILC1	NK	CD4+NKT	Tregs	Th17	Th1	Th2	CD8+Tcells	CD8+NKT	Eosinophils | Count	CD64+	cDC1	cDC2	CX3CR1+DC	Neutrophils
SD	B3-0	F	B	8.17235e+06	3.24122e+08	1.8167e+06	749039	162106	626063	1.3192e+06	1.35889e+07	1.64341e+06	1.63223e+06	2.10625e+07	4.48641e+07	223594	1.30873e+06	604508	137105	2.34948e+06	2.16252e+06	9.80301e+06
SD	B3-L	F	B	1.08802e+07	4.61283e+08	1.81336e+06	930232	206064	965557	1.7957e+06	1.25405e+07	1.73682e+06	1.937e+06	1.7433e+07	5.26111e+07	329702	3.59911e+06	616325	156989	4.51778e+06	2.73276e+06	1.94666e+07
SD	B3-R	F	B	9.71092e+06	3.76997e+08	1.77387e+06	816382	226773	927249	1.17922e+06	1.21701e+07	1.57229e+06	2.3786e+06	1.93563e+07	4.68563e+07	186458	1.55877e+06	572074	115464	3.30123e+06	2.15709e+06	1.10741e+07
SD	B3-RL	F	B	1.01108e+07	3.69987e+08	1.74429e+06	603402	248460	1.25751e+06	1.31329e+06	1.43245e+07	1.31836e+06	1.92683e+06	1.72248e+07	4.97223e+07	431001	1.92407e+06	633113	153332	3.55631e+06	2.42363e+06	1.15939e+07
SD	B4-0	F	B	1.05837e+07	3.86473e+08	1.30497e+06	479769	57572.3	105549	1.47769e+06	1.06797e+07	1.15145e+06	1.14185e+06	6.78394e+06	5.6843e+07	518151	1.7186e+06	1.26243e+06	143217	3.90928e+06	2.65746e+06	1.09534e+07
SD	B4-LL	F	B	1.51142e+07	5.88665e+08	2.29574e+06	918296	158067	496783	1.96455e+06	1.86745e+07	5.02052e+06	2.228e+06	1.0869e+07	9.16414e+07	677431	2.54077e+06	3.26327e+06	337164	7.42364e+06	5.01532e+06	1.43475e+07
SD	B4-R	F	B	1.06605e+07	4.57761e+08	1.64252e+06	669677	153845	398187	1.16289e+06	1.27058e+07	1.63799e+06	2.1855e+06	6.64248e+06	6.56012e+07	366513	2.05368e+06	2.17843e+06	172739	5.18697e+06	3.88663e+06	1.10217e+07
SD	B4-RL	F	B	1.30064e+07	5.55066e+08	2.07197e+06	928242	176808	442020	1.40894e+06	1.57249e+07	1.32053e+06	2.1659e+06	8.90117e+06	6.90269e+07	618828	1.71289e+06	2.19432e+06	253386	7.65733e+06	5.09306e+06	1.39514e+07
SD	B7-R	F	B	1.25385e+07	5.37426e+08	2.45843e+06	1.07224e+06	96598.6	212517	1.76775e+06	1.40648e+07	2.39082e+06	7.2449e+06	1.61803e+07	7.86313e+07	1.09156e+06	2.0199e+06	1.40191e+06	961311	6.03108e+06	4.14279e+06	1.31265e+07
SD	B7-RR	F	B	1.14356e+07	5.05642e+08	1.62422e+06	679906	28329.4	47215.7	2.09638e+06	1.42497e+07	1.38814e+06	4.14554e+06	1.41364e+07	6.25136e+07	462714	1.57348e+06	558331	507574	4.14688e+06	2.80181e+06	1.11159e+07
SD	C2-0	F	B+C	2.01677e+07	7.34579e+08	2.83212e+06	1.0136e+06	119247	298118	2.57872e+06	2.42519e+07	8.60072e+06	1.78871e+06	1.62624e+07	1.06249e+08	387554	5.52894e+06	3.50769e+06	440428	1.37791e+07	9.13101e+06	2.50808e+07
SD	C2-L	F	B+C	2.31192e+07	9.30301e+08	4.63045e+06	1.64626e+06	165176	1.06263e+06	3.20442e+06	2.76065e+07	5.41228e+06	3.23746e+06	2.28769e+07	1.16851e+08	847906	6.58192e+06	2.4168e+06	1.10042e+06	1.67531e+07	8.83418e+06	2.79732e+07
SD	C2-R	F	B+C	1.44923e+07	5.46991e+08	2.63641e+06	865567	47645.9	134997	1.94554e+06	1.75575e+07	3.03346e+06	1.69143e+06	1.53976e+07	8.25386e+07	651161	2.86858e+06	1.96104e+06	520406	1.04652e+07	7.07625e+06	1.72622e+07
SD	C2-RR	F	B+C	1.5406e+07	5.53574e+08	2.67193e+06	1.02317e+06	93546.7	309873	2.74793e+06	2.35562e+07	4.68903e+06	3.22736e+06	1.79142e+07	9.42132e+07	689907	3.0292e+06	3.26081e+06	414458	1.09405e+07	6.82637e+06	1.94125e+07
SD	C4-L	F	B+C	1.34076e+07	4.69865e+08	3.00109e+06	1.54664e+06	302158	891109	1.33154e+06	1.44472e+07	3.71295e+06	9.14155e+06	8.42456e+06	7.17906e+07	711863	4.19846e+06	834377	504878	7.72198e+06	5.35171e+06	1.80162e+07
SD	C4-R	F	B+C	1.282e+07	4.62084e+08	2.90404e+06	881142	260619	1.29069e+06	2.00429e+06	1.48987e+07	4.21335e+06	8.6687e+06	8.85485e+06	6.44412e+07	508828	3.66221e+06	1.00751e+06	687664	6.26893e+06	4.69637e+06	1.48621e+07
SD	C4-RL	F	B+C	1.76916e+07	6.13517e+08	4.313e+06	1.6118e+06	242089	1.07029e+06	1.98131e+06	1.91505e+07	4.10914e+06	9.84282e+06	1.25695e+07	8.12335e+07	847311	3.91045e+06	1.69366e+06	804323	1.29738e+07	8.27864e+06	2.04677e+07
SD	C6-0	F	B+C	2.019e+07	7.02587e+08	7.79024e+06	1.35701e+06	796974	2.3981e+06	2.52734e+06	2.5618e+07	4.11411e+06	1.38573e+07	2.85259e+07	1.15619e+08	1.12725e+06	2.81015e+06	2.78425e+06	1.28853e+06	1.13636e+07	4.57135e+06	2.56087e+07
SD	R6-0	F	B+R	1.76082e+07	6.36703e+08	3.41416e+06	1.27083e+06	132773	594317	2.30772e+06	1.90498e+07	3.15494e+06	6.01272e+06	9.73668e+06	9.37567e+07	733413	1.83868e+06	1.05155e+06	350517	7.5392e+06	4.51368e+06	1.95613e+07
SD	R6-LL	F	B+R	1.60086e+07	5.61573e+08	3.36534e+06	1.57626e+06	172923	558673	1.85559e+06	1.57892e+07	2.58719e+06	5.02806e+06	9.69697e+06	8.32556e+07	724945	3.17705e+06	1.02976e+06	667006	7.35462e+06	4.65149e+06	2.12623e+07
SD	R6-R	F	B+R	1.54948e+07	6.1334e+08	3.53691e+06	1.22842e+06	154295	658720	1.60229e+06	1.56728e+07	2.56367e+06	4.71193e+06	1.13763e+07	8.76513e+07	510360	3.3689e+06	968714	271487	6.92291e+06	4.8374e+06	1.65915e+07
SD	R6-RL	F	B+R	1.23304e+07	5.2672e+08	4.3448e+06	1.52873e+06	328542	1.04597e+06	2.2998e+06	1.40938e+07	2.42048e+06	4.73369e+06	1.04798e+07	6.32209e+07	670494	3.89936e+06	1.36024e+06	481317	7.03141e+06	4.49926e+06	1.98316e+07
SD	R6-RR	F	B+R	1.60569e+07	5.76424e+08	3.53526e+06	1.31717e+06	159657	798285	2.77689e+06	1.90562e+07	2.68566e+06	7.97144e+06	1.44946e+07	9.0172e+07	792583	3.33895e+06	807458	474655	7.91091e+06	4.5174e+06	2.04483e+07
SD	R8-0	F	B+R	1.12468e+07	5.1644e+08	3.89386e+06	1.41899e+06	9555.48	181554	1.67221e+06	1.44622e+07	2.20732e+06	2.00665e+06	1.62204e+07	6.34962e+07	893437	2.686e+06	2.5426e+06	711487	7.8043e+06	5.34994e+06	1.59892e+07
SD	R8-L	F	B+R	1.27864e+07	4.99396e+08	3.56576e+06	1.23448e+06	52228.1	284881	1.84698e+06	1.27911e+07	1.49562e+06	5.96825e+06	1.33894e+07	6.88984e+07	669470	2.00691e+06	2.80249e+06	549206	6.51349e+06	4.74781e+06	1.09636e+07
SD	R8-LL	F	B+R	1.09413e+07	4.39377e+08	3.06144e+06	866352	24335.7	155749	1.35307e+06	1.20754e+07	1.22652e+06	3.90345e+06	1.27714e+07	5.59527e+07	564589	2.49777e+06	4.10777e+06	506575	5.50712e+06	4.45385e+06	1.46957e+07
SD	B3-RR	M	B	1.19517e+07	6.23443e+08	2.16899e+06	757660	237697	1.38162e+06	1.21077e+06	1.56286e+07	1.81244e+06	2.65924e+06	2.08431e+07	6.83751e+07	401114	5.84948e+06	952961	123962	6.50803e+06	4.92751e+06	2.87205e+07
SD	B4-L	M	B	1.10007e+07	6.45843e+08	2.42765e+06	641865	82616.2	279624	1.43625e+06	1.77943e+07	1.26466e+06	1.79849e+06	1.19031e+07	7.50918e+07	374951	3.03986e+06	4.24833e+06	218023	8.54649e+06	6.8646e+06	1.76661e+07
SD	B4-LLR	M	B	1.10006e+07	6.45103e+08	2.10856e+06	657716	25792.8	283720	1.13488e+06	1.5998e+07	1.16067e+06	1.92156e+06	1.24901e+07	6.77898e+07	593234	2.90411e+06	2.00648e+06	111471	7.58002e+06	6.52985e+06	1.39221e+07
SD	B4-RR	M	B	1.00375e+07	5.45456e+08	2.00749e+06	542023	85318.4	331236	853184	1.32294e+07	1.0188e+06	1.53573e+06	9.14914e+06	6.13439e+07	516929	2.81926e+06	2.34707e+06	166656	6.60142e+06	5.31446e+06	1.41889e+07
SD	B4-RRL	M	B	1.01549e+07	5.11456e+08	1.57441e+06	488066	41984.2	73472.3	965636	1.25638e+07	997124	1.49569e+06	8.91114e+06	6.2929e+07	414594	3.47975e+06	4.0265e+06	171439	6.8622e+06	5.19878e+06	2.11473e+07
SD	B7-0	M	B	1.06685e+07	5.75782e+08	2.48594e+06	853482	20321	94831.3	1.45634e+06	1.68867e+07	1.44279e+06	9.46958e+06	1.74761e+07	7.84255e+07	704461	3.50988e+06	1.31332e+06	568339	6.94296e+06	4.89233e+06	2.62742e+07
SD	B7-L	M	B	1.06584e+07	5.53443e+08	2.25978e+06	807064	10413.7	31241.2	1.17154e+06	1.95466e+07	1.70785e+06	1.32775e+06	1.80001e+07	7.92484e+07	510273	3.32764e+06	617269	690219	9.76968e+06	5.9819e+06	2.60431e+07
SD	B7-RL	M	B	7.25683e+06	4.18517e+08	2.08257e+06	737060	9893.43	49467.1	979449	1.03139e+07	1.14269e+06	727167	9.30477e+06	4.87845e+07	356163	3.19936e+06	1.41611e+06	655606	5.57528e+06	3.59272e+06	1.83675e+07
SD	B9-0	M	B	1.35364e+07	6.68311e+08	7.97124e+06	1.05304e+06	361216	3.18972e+06	1.65914e+06	2.08771e+07	2.99381e+06	1.35854e+07	2.36872e+07	1.03571e+08	955079	5.86313e+06	2.21525e+06	941814	1.30925e+07	6.40036e+06	3.30763e+07
SD	B9-L	M	B	1.19029e+07	5.98615e+08	7.94917e+06	1.08209e+06	430060	3.49597e+06	1.24856e+06	1.60163e+07	2.37227e+06	8.79542e+06	1.87076e+07	8.41946e+07	797692	7.61969e+06	2.99516e+06	1.20605e+06	1.21164e+07	7.3641e+06	4.64449e+07
SD	B9-R	M	B	1.29289e+07	6.10688e+08	7.04439e+06	1.01415e+06	582984	3.71045e+06	2.92707e+06	1.89773e+07	1.37244e+06	9.72855e+06	1.93356e+07	1.10239e+08	1.74895e+06	6.42316e+06	2.67735e+06	826190	1.16598e+07	6.47285e+06	4.06572e+07
SD	C2-RL	M	B+C	2.52714e+07	1.24299e+09	6.08386e+06	1.67791e+06	45657.5	148387	3.80098e+06	3.88659e+07	4.41736e+06	3.02481e+06	2.26461e+07	1.63157e+08	1.19851e+06	1.13796e+07	4.27126e+06	429220	2.75434e+07	1.84565e+07	5.62278e+07
SD	C4-0	M	B+C	1.20129e+07	5.09208e+08	3.9922e+06	1.55084e+06	133275	636086	1.24188e+06	1.67382e+07	4.10124e+06	6.53654e+06	9.03243e+06	7.03633e+07	660318	7.60937e+06	1.31375e+06	591840	8.59794e+06	7.02404e+06	3.71363e+07
SD	C4-LL	M	B+C	1.29571e+07	5.68407e+08	5.56931e+06	1.62303e+06	86850.9	732804	1.39504e+06	1.77556e+07	4.33169e+06	6.73637e+06	1.02755e+07	7.94577e+07	825084	6.65984e+06	1.73502e+06	787018	1.10004e+07	7.78671e+06	3.54158e+07
SD	C4-LLR	M	B+C	1.28394e+07	5.1629e+08	3.89328e+06	1.31503e+06	90691.9	265598	1.45755e+06	1.67391e+07	3.49164e+06	5.19535e+06	1.0883e+07	7.83125e+07	706102	6.79434e+06	977705	446344	9.81956e+06	6.72349e+06	3.30082e+07
SD	C4-RR	M	B+C	1.24333e+07	5.45929e+08	4.0922e+06	1.31763e+06	145114	644304	1.277e+06	1.75297e+07	3.69169e+06	5.6246e+06	9.73422e+06	8.11997e+07	696545	4.73564e+06	1.34096e+06	471148	9.47733e+06	7.30884e+06	2.50313e+07
SD	C6-L	M	B+C	1.53159e+07	6.44482e+08	9.69308e+06	1.61326e+06	796506	5.17054e+06	1.68751e+06	2.19174e+07	5.29204e+06	1.27441e+07	2.57177e+07	9.96038e+07	857257	5.78987e+06	1.59601e+06	1.25747e+06	1.64231e+07	7.7037e+06	4.01353e+07
SD	C6-R	M	B+C	1.54294e+07	6.75433e+08	9.97563e+06	2.13873e+06	756193	5.33154e+06	2.3526e+06	2.4053e+07	4.38439e+06	1.52919e+07	2.81854e+07	1.08815e+08	847852	5.10478e+06	1.28228e+06	722298	1.40077e+07	6.98762e+06	4.06191e+07
SD	C6-RL	M	B+C	1.3246e+07	5.83425e+08	8.33734e+06	1.30328e+06	627280	4.33006e+06	1.90011e+06	2.14189e+07	3.83067e+06	1.18452e+07	2.35991e+07	9.88301e+07	931785	5.45288e+06	2.83468e+06	798312	1.27798e+07	6.49474e+06	3.8752e+07
SD	R1-RL	M	B+R	7.57807e+06	3.97919e+08	1.52343e+06	468746	257811	476559	1.10937e+06	1.22733e+07	1.5703e+06	1.48436e+06	2.03202e+07	4.24528e+07	210936	1.185e+06	536604	111792	3.42085e+06	2.85443e+06	7.60189e+06
SD	R1-RR	M	B+R	8.76256e+06	4.79124e+08	1.6342e+06	598960	170075	584171	1.2201e+06	1.46486e+07	2.29232e+06	1.82646e+06	2.0653e+07	4.71847e+07	207048	1.45423e+06	549376	48474.4	3.66789e+06	2.53682e+06	8.44262e+06
SD	R6-L	M	B+R	1.12896e+07	6.38311e+08	3.39272e+06	1.09386e+06	105291	520607	1.2401e+06	1.79054e+07	2.42755e+06	4.71471e+06	9.14865e+06	7.81379e+07	649297	4.18266e+06	895860	326307	8.94674e+06	5.63028e+06	2.76174e+07
SD	R7-0	M	B+R	7.80342e+06	4.56989e+08	2.48617e+06	840700	0	35927.4	970039	1.3365e+07	1.19279e+06	898184	1.38895e+07	5.72107e+07	488612	2.26453e+06	696778	499862	6.25585e+06	3.93831e+06	1.97143e+07
SD	R7-L	M	B+R	9.77089e+06	5.37739e+08	2.15721e+06	726760	11535.9	5767.94	1.33816e+06	1.53889e+07	1.58042e+06	9.09027e+06	1.25741e+07	7.30279e+07	547954	3.47421e+06	814778	527976	7.56766e+06	5.41664e+06	3.67693e+07
SD	R7-R	M	B+R	1.17232e+07	6.03862e+08	2.52887e+06	1.01841e+06	5721.42	51492.8	1.39031e+06	1.71128e+07	1.45324e+06	6.06471e+06	1.17232e+07	7.59805e+07	869656	3.56976e+06	1.71465e+06	825141	9.84902e+06	5.70576e+06	3.43516e+07
SD	R7-RL	M	B+R	6.61309e+06	3.78916e+08	1.77144e+06	477097	13252.7	22087.8	839337	1.08319e+07	905600	910017	8.32268e+06	5.19063e+07	910017	2.60943e+06	1.35649e+06	559164	6.6323e+06	3.75882e+06	2.55662e+07
SD	R7-RR	M	B+R	7.86902e+06	3.82995e+08	2.20814e+06	740509	22304.5	40148.1	1.50778e+06	1.49663e+07	1.78436e+06	7.82441e+06	1.56265e+07	6.10429e+07	401481	1.91297e+06	926119	799600	5.21764e+06	3.84618e+06	1.83857e+07
SD	R8-R	M	B+R	9.63591e+06	5.33734e+08	4.53727e+06	978526	10300.3	195705	880673	1.27466e+07	1.61714e+06	4.11496e+06	1.12015e+07	6.27802e+07	818872	3.25177e+06	2.30923e+06	450326	7.96972e+06	6.03751e+06	2.559e+07
SD	R8-RL	M	B+R	1.07392e+07	6.3183e+08	4.58846e+06	1.16303e+06	23144.8	150441	1.16303e+06	1.64444e+07	2.15825e+06	6.12759e+06	1.32504e+07	7.38666e+07	786923	5.8871e+06	3.50423e+06	860129	1.01941e+07	6.99571e+06	3.88332e+07
HFHS	B1-LL	F	B	2.53574e+07	7.4128e+08	3.79608e+06	1.52647e+06	823488	2.50059e+06	2.22944e+06	3.2819e+07	3.66553e+06	5.76442e+06	3.87542e+07	7.64338e+07	1.3457e+06	3.82705e+06	1.63886e+06	238046	6.43641e+06	4.33977e+06	2.36948e+07
HFHS	B1-R	F	B	9.47179e+06	3.19803e+08	1.52771e+06	601227	280901	1.00533e+06	887056	1.27194e+07	1.76918e+06	2.95193e+06	1.782e+07	3.90354e+07	665292	993045	442614	130515	3.11532e+06	2.32089e+06	6.43493e+06
HFHS	B2-RL	F	B	2.18795e+07	6.99125e+08	2.48119e+06	789468	142460	451125	1.95289e+06	1.99148e+07	2.40402e+06	2.5999e+06	1.45903e+07	9.92474e+07	741981	2.69202e+06	2.84667e+06	234836	1.09456e+07	5.85372e+06	1.3294e+07
HFHS	B5-0	F	B	1.34234e+07	4.26078e+08	2.01728e+06	675390	128857	604296	1.15527e+06	1.66759e+07	2.41718e+06	3.07036e+06	1.01264e+07	6.87831e+07	497656	3.594e+06	804284	110302	6.8479e+06	4.14091e+06	1.2294e+07
HFHS	B5-L	F	B	1.7897e+07	5.31728e+08	2.09052e+06	819522	191385	750820	1.39368e+06	1.73915e+07	2.5469e+06	2.12978e+06	1.05998e+07	8.28797e+07	618322	3.44435e+06	4.70711e+06	93356	9.49775e+06	5.23777e+06	1.29274e+07
HFHS	B5-R	F	B	1.47071e+07	4.64383e+08	1.51839e+06	1.03527e+06	363912	1.09801e+06	1.35526e+06	1.50396e+07	2.59131e+06	2.90502e+06	8.58958e+06	6.17521e+07	765470	3.40987e+06	3.63363e+06	160522	7.87529e+06	4.46056e+06	1.17667e+07
HFHS	B6-0	F	B	1.65953e+07	5.31466e+08	2.25145e+06	1.0946e+06	202319	648458	1.35917e+06	1.51272e+07	2.50046e+06	5.95025e+06	1.04324e+07	8.62709e+07	674397	1.18656e+06	1.03955e+06	136507	7.00385e+06	4.81449e+06	6.70984e+06
HFHS	B8-L	F	B	1.2689e+07	4.74118e+08	3.15484e+06	1.13139e+06	87030.1	404690	1.18796e+06	1.25367e+07	1.7406e+06	2.79802e+06	1.32025e+07	6.57687e+07	1.07917e+06	2.90364e+06	1.91429e+06	473970	6.88407e+06	3.73194e+06	1.23784e+07
HFHS	B8-LL	F	B	1.37371e+07	5.56664e+08	3.2752e+06	1.50722e+06	52152.9	354640	1.06392e+06	1.75807e+07	2.46162e+06	3.53075e+06	1.72209e+07	7.58616e+07	724925	3.50942e+06	3.04815e+06	532595	8.06976e+06	4.6602e+06	1.76945e+07
HFHS	B8-R	F	B	1.60908e+07	5.38569e+08	3.29414e+06	1.11366e+06	41632.1	307037	879479	1.43787e+07	1.66529e+06	3.30455e+06	1.68246e+07	7.40376e+07	536014	2.69376e+06	2.37568e+06	675925	6.32686e+06	3.85675e+06	1.54021e+07
HFHS	B8-RL	F	B	1.79244e+07	5.56427e+08	4.80602e+06	1.14581e+06	42437.3	429677	1.40573e+06	1.64816e+07	1.84072e+06	3.4162e+06	1.68052e+07	7.88219e+07	1.01849e+06	4.28915e+06	2.86139e+06	1.36313e+06	8.47253e+06	3.66634e+06	1.7938e+07
HFHS	C1-0	F	B+C	2.2039e+07	6.97628e+08	3.57513e+06	1.48887e+06	514672	1.49806e+06	1.86569e+06	2.56876e+07	6.63559e+06	3.74056e+06	4.39217e+07	9.01135e+07	551434	2.07349e+06	1.34828e+06	275785	6.12855e+06	5.26034e+06	1.11131e+07
HFHS	C1-RL	F	B+C	1.78746e+07	5.21643e+08	2.58803e+06	1.14736e+06	396831	1.12148e+06	1.42342e+06	2.26884e+07	5.82306e+06	3.4162e+06	2.92361e+07	7.5372e+07	508979	2.76492e+06	654850	127332	4.79314e+06	3.66534e+06	1.4625e+07
HFHS	C1-RRL	F	B+C	1.61358e+07	5.28741e+08	3.46425e+06	1.58826e+06	345274	402820	1.99108e+06	2.52395e+07	6.9285e+06	2.03712e+06	4.87182e+07	9.6343e+07	552438	2.50195e+06	580162	72520.2	5.16102e+06	3.89192e+06	1.923e+07
HFHS	C3-0	F	B+C	2.06707e+07	6.60317e+08	2.97068e+06	1.4087e+06	284660	715300	1.62767e+06	2.19261e+07	4.71514e+06	2.91959e+06	1.50432e+07	8.90257e+07	912373	2.15704e+06	1.23635e+06	230172	9.34497e+06	5.65564e+06	1.08246e+07
HFHS	C3-RL	F	B+C	1.8406e+07	5.78315e+08	2.57072e+06	1.10601e+06	276502	642680	1.89815e+06	1.95644e+07	4.58843e+06	2.70523e+06	1.32422e+07	1.02156e+08	642680	3.57074e+06	933173	254502	1.06582e+07	6.33941e+06	1.42984e+07
HFHS	C5-L	F	B+C	2.40166e+07	7.41597e+08	4.769e+06	1.92132e+06	80055.2	411712	2.41309e+06	2.43368e+07	5.55812e+06	6.12994e+06	2.3033e+07	1.34538e+08	1.15508e+06	3.27937e+06	1.38234e+06	566169	1.05146e+07	7.19108e+06	1.95806e+07
HFHS	C5-R	F	B+C	1.35059e+07	4.63607e+08	3.30144e+06	1.39008e+06	31592.7	426501	1.00044e+06	1.50539e+07	3.7648e+06	4.02807e+06	1.66809e+07	7.93398e+07	668712	2.99272e+06	1.56542e+06	377543	6.99836e+06	3.82148e+06	1.53412e+07
HFHS	C5-RL	F	B+C	1.88495e+07	6.24024e+08	4.06978e+06	1.82415e+06	55277.1	331663	1.67213e+06	2.1109e+07	6.26014e+06	6.46052e+06	2.22905e+07	1.02608e+08	1.2161e+06	3.4309e+06	2.11632e+06	520052	9.38261e+06	6.39231e+06	2.07226e+07
HFHS	C5-RR	F	B+C	1.64263e+07	5.24296e+08	3.67304e+06	1.33565e+06	118485	387769	1.47568e+06	1.8376e+07	4.38395e+06	6.93676e+06	2.28353e+07	1.18991e+08	786310	2.9564e+06	1.31395e+06	433605	9.07942e+06	5.76826e+06	1.53338e+07
HFHS	C7-0	F	B+C	2.26215e+07	7.46021e+08	7.29692e+06	1.25844e+06	700261	3.11565e+06	2.22257e+06	3.24556e+07	7.20558e+06	1.44924e+07	2.81424e+07	1.28574e+08	791599	3.02278e+06	969443	565509	1.17882e+07	5.83012e+06	2.74137e+07
HFHS	C7-L	F	B+C	2.09695e+07	6.72472e+08	5.92508e+06	1.41175e+06	891258	3.4153e+06	1.80391e+06	2.27592e+07	6.21742e+06	1.20142e+07	2.19535e+07	1.13404e+08	1.10516e+06	3.45514e+06	2.98823e+06	610097	1.05522e+07	6.30642e+06	2.23059e+07
HFHS	C7-RR	F	B+C	2.1195e+07	6.48781e+08	7.20502e+06	1.73825e+06	1.12437e+06	3.96114e+06	2.17766e+06	2.46909e+07	8.61371e+06	1.40159e+07	2.41546e+07	1.08566e+08	1.42808e+06	3.94862e+06	3.05038e+06	452132	1.17132e+07	4.64189e+06	3.21677e+07
HFHS	R2-RL	F	B+R	1.20521e+07	4.85013e+08	1.6256e+06	585564	209754	445728	987594	1.32844e+07	1.94023e+06	1.80913e+06	8.85338e+06	5.07431e+07	445728	1.37611e+06	3.38931e+06	118923	6.31566e+06	5.20713e+06	8.15472e+06
HFHS	R3-RR	F	B+R	1.82007e+07	6.27983e+08	1.72972e+06	844055	202098	564685	1.4444e+06	1.90685e+07	1.99126e+06	2.65699e+06	9.05279e+06	8.28779e+07	719230	1.8461e+06	3.2864e+06	91447.6	1.10194e+07	6.52136e+06	1.08651e+07
HFHS	R4-0	F	B+R	1.34552e+07	5.30839e+08	1.7956e+06	666489	156821	415575	909561	1.4898e+07	2.48561e+06	1.98378e+06	8.23309e+06	7.92808e+07	525350	2.87918e+06	1.25252e+06	86754.9	7.25488e+06	4.54921e+06	1.02642e+07
HFHS	R4-L	F	B+R	1.67586e+07	5.17898e+08	1.66828e+06	947887	205827	514567	1.24579e+06	1.57458e+07	2.30201e+06	2.33993e+06	7.4531e+06	7.86963e+07	547066	1.52538e+06	2.6642e+06	52239.1	7.15676e+06	4.97317e+06	1.15448e+07
HFHS	R4-RR	F	B+R	1.97599e+07	6.99989e+08	2.67653e+06	1.22219e+06	218493	860314	1.41337e+06	1.78481e+07	2.86089e+06	3.5505e+06	1.13343e+07	8.54852e+07	757896	3.26904e+06	1.72754e+06	106310	8.61112e+06	6.00652e+06	1.4199e+07
HFHS	R5-LL	F	B+R	1.81784e+07	4.98354e+08	1.71594e+06	978027	251827	521224	2.10832e+06	2.09954e+07	2.93994e+06	2.94579e+06	8.4977e+06	8.02158e+07	650066	70691.8	706918	35345.9	2.86302e+06	2.5449e+06	2.93371e+06
HFHS	B1-L	M	B	1.0571e+07	5.10961e+08	1.95542e+06	485180	389614	1.05122e+06	668960	1.53787e+07	1.16884e+06	2.19066e+06	1.80987e+07	5.12894e+07	441073	3.90041e+06	1.03043e+06	145228	5.63624e+06	4.08022e+06	2.23928e+07
HFHS	B1-RL	M	B	1.39956e+07	5.90634e+08	2.94414e+06	754165	696152	1.08049e+06	1.07323e+06	1.98621e+07	2.92239e+06	5.05435e+06	2.47424e+07	6.65696e+07	1.00072e+06	3.14314e+06	1.36469e+06	123403	9.27697e+06	6.91055e+06	2.1218e+07
HFHS	B1-RR	M	B	9.14616e+06	4.33961e+08	1.51578e+06	478279	279609	860902	515069	1.089e+07	1.14787e+06	2.08971e+06	1.72548e+07	4.09995e+07	220744	2.4927e+06	1.08656e+06	55925.9	3.0919e+06	2.8682e+06	1.56912e+07
HFHS	B2-0	M	B	1.82586e+07	7.43988e+08	2.27417e+06	577862	214368	904074	1.45397e+06	2.4149e+07	1.66834e+06	4.306e+06	1.19301e+07	1.05012e+08	1.0532e+06	5.07635e+06	2.79469e+06	182263	1.30554e+07	9.26164e+06	1.79967e+07
HFHS	B2-L	M	B	1.55585e+07	7.59756e+08	2.28727e+06	1.01302e+06	242107	1.16593e+06	2.17896e+06	2.20699e+07	2.55486e+06	3.23658e+06	8.856e+06	8.5521e+07	777289	6.68119e+06	3.87674e+06	82483.8	1.63918e+07	1.21101e+07	2.39128e+07
HFHS	B2-R	M	B	3.15145e+07	1.4818e+09	3.36233e+06	1.35673e+06	427665	1.78439e+06	2.03509e+06	3.97286e+07	4.46836e+06	4.39462e+06	1.83748e+07	1.7726e+08	1.53369e+06	7.29171e+06	5.37828e+06	258571	2.96969e+07	1.94704e+07	3.19335e+07
HFHS	B5-RL	M	B	1.18035e+07	5.88534e+08	2.59723e+06	771053	150732	730471	1.05512e+06	1.94039e+07	1.96531e+06	1.93633e+06	1.25861e+07	8.252e+07	637713	6.20677e+06	1.41767e+06	101262	8.92894e+06	6.862e+06	2.26232e+07
HFHS	B5-RR	M	B	1.5616e+07	7.17037e+08	2.73342e+06	892159	120220	512517	1.17056e+06	1.88429e+07	2.38542e+06	2.00578e+06	1.21865e+07	8.91463e+07	493535	1.07799e+07	7.20161e+06	89939.8	1.44418e+07	8.39652e+06	2.89478e+07
HFHS	B6-R	M	B	1.4176e+07	5.8701e+08	2.51941e+06	1.20165e+06	319280	1.47449e+06	708221	1.31892e+07	2.95479e+06	5.09106e+06	5.53805e+06	7.51236e+07	812712	3.34474e+06	825714	394907	1.18352e+07	6.62366e+06	1.39594e+07
HFHS	B8-0	M	B	1.35897e+07	6.82841e+08	5.54002e+06	1.49951e+06	106660	790536	815632	1.9412e+07	2.03281e+06	6.33683e+06	1.73667e+07	8.66389e+07	972484	4.48456e+06	2.7729e+06	336628	1.25123e+07	6.15629e+06	2.48876e+07
HFHS	C1-LL	M	B+C	1.44377e+07	5.56108e+08	2.80801e+06	942120	734120	2.96095e+06	1.13789e+06	2.15281e+07	5.45696e+06	4.16613e+06	3.18547e+07	7.77066e+07	770826	3.0313e+06	1.70086e+06	120950	6.56908e+06	4.5205e+06	1.91403e+07
HFHS	C1-LLR	M	B+C	1.28596e+07	5.34515e+08	2.70422e+06	1.17377e+06	428006	1.70554e+06	1.08299e+06	2.16403e+07	6.08288e+06	3.4889e+06	2.92017e+07	6.83513e+07	479886	2.0564e+06	1.49499e+06	75695.8	5.67718e+06	3.78479e+06	1.38839e+07
HFHS	C1-R	M	B+C	1.98276e+07	8.21354e+08	3.42876e+06	1.29531e+06	1.03286e+06	3.05626e+06	1.03286e+06	2.89286e+07	6.24797e+06	3.95366e+06	3.61248e+07	9.36603e+07	634956	2.60757e+06	1.14811e+06	116757	8.94164e+06	6.04217e+06	1.67644e+07
HFHS	C3-L	M	B+C	1.28967e+07	6.57155e+08	2.70363e+06	1.23649e+06	525350	2.12703e+06	781618	2.00338e+07	5.11255e+06	3.61338e+06	1.20574e+07	7.86936e+07	896939	4.73055e+06	1.33585e+06	337405	1.18505e+07	8.06328e+06	1.72076e+07
HFHS	C3-R	M	B+C	1.29469e+07	5.37243e+08	2.60917e+06	958346	253498	1.18093e+06	890335	2.0082e+07	4.85356e+06	2.67719e+06	1.22916e+07	7.49736e+07	859420	5.03674e+06	1.03662e+06	195128	1.11223e+07	6.5002e+06	1.89457e+07
HFHS	C3-RR	M	B+C	1.21802e+07	5.98996e+08	2.8073e+06	1.10314e+06	342353	1.08792e+06	669491	1.68438e+07	4.13867e+06	2.22149e+06	1.11075e+07	7.08291e+07	852079	6.28349e+06	1.53151e+06	221855	9.45387e+06	6.9419e+06	2.26578e+07
HFHS	C7-LL	M	B+C	1.61801e+07	6.84524e+08	6.87144e+06	1.83596e+06	805246	3.94034e+06	1.01998e+06	2.52633e+07	6.00177e+06	9.75959e+06	1.72001e+07	9.65222e+07	751563	4.1433e+06	1.45538e+06	1.05149e+06	1.126e+07	5.29924e+06	2.84599e+07
HFHS	C7-R	M	B+C	1.31757e+07	5.90544e+08	6.38401e+06	1.46909e+06	846073	3.95347e+06	1.7383e+06	2.29132e+07	4.9303e+06	1.28911e+07	1.83982e+07	1.0249e+08	1.34603e+06	3.34216e+06	4.85573e+06	787600	1.14236e+07	6.8076e+06	2.33472e+07
HFHS	C7-RL	M	B+C	1.65668e+07	7.53223e+08	5.00895e+06	1.02935e+06	899665	4.18223e+06	1.40218e+06	2.58147e+07	7.56205e+06	1.37057e+07	2.31563e+07	1.17605e+08	1.19145e+06	6.27352e+06	7.54794e+06	546183	1.42842e+07	6.53144e+06	4.91337e+07
HFHS	R2-0	M	B+R	1.19719e+07	6.30718e+08	1.94859e+06	721958	35046.5	168223	1.02336e+06	1.79088e+07	2.01868e+06	1.89251e+06	1.03948e+07	6.76047e+07	546726	5.31528e+06	2.58615e+06	74600.4	1.17309e+07	8.62878e+06	3.50124e+07
HFHS	R3-R	M	B+R	8.78205e+06	3.93206e+08	1.6156e+06	444661	192686	622525	666991	1.16353e+07	1.37104e+06	1.05977e+06	1.82459e+07	4.57111e+07	170453	998360	592776	101396	4.29763e+06	3.03408e+06	5.30379e+06
HFHS	R3-RL	M	B+R	1.02359e+07	4.86796e+08	1.73649e+06	671297	238560	1.29821e+06	621366	1.33982e+07	1.57561e+06	1.58115e+06	1.60667e+07	5.37648e+07	266300	1.19708e+06	1.07961e+06	89501.2	5.87911e+06	3.99958e+06	6.10846e+06
HFHS	R4-RL	M	B+R	1.3433e+07	6.5771e+08	2.64306e+06	956166	124379	458649	1.065e+06	1.9271e+07	2.79854e+06	2.61197e+06	1.02613e+07	9.20252e+07	544160	6.11084e+06	1.13114e+06	113783	1.26099e+07	8.72786e+06	2.28705e+07
HFHS	R4-RRL	M	B+R	1.33196e+07	6.85012e+08	3.60134e+06	1.63628e+06	160569	665216	1.26926e+06	1.85113e+07	2.5844e+06	2.26326e+06	1.22415e+07	8.2502e+07	864016	4.91574e+06	1.9137e+06	116867	1.19278e+07	8.10768e+06	2.24678e+07
HFHS	R5-0	M	B+R	1.43194e+07	6.72806e+08	1.8104e+06	1.08624e+06	241387	543121	1.09486e+06	1.65954e+07	2.09489e+06	1.62936e+06	5.43121e+06	8.10888e+07	758645	4.85754e+06	1.73054e+06	93542.7	1.00492e+07	7.10257e+06	2.1007e+07
HFHS	R5-R	M	B+R	1.67109e+07	7.44579e+08	2.97129e+06	1.10984e+06	210730	491703	1.15902e+06	1.97243e+07	2.44447e+06	3.03451e+06	1.13232e+07	1.01263e+08	793750	5.46859e+06	2.89412e+06	129587	1.56542e+07	8.68236e+06	2.01811e+07
HFHS	R5-RL	M	B+R	1.20262e+07	5.81681e+08	2.28673e+06	1.19275e+06	265899	622963	1.12437e+06	1.63034e+07	2.51464e+06	2.3551e+06	7.13369e+06	6.45147e+07	759711	4.98549e+06	2.2774e+06	143561	1.10412e+07	6.95619e+06	2.30742e+07
SD	B3-R.2	F	B	1.39778e+07	4.72142e+08	1.27832e+06	446575	72568.5	128390	2.72411e+06	1.76286e+07	1.46812e+06	1.17784e+06	1.17282e+07	7.31378e+07	334931	4.08189e+06	977259	651506	1.01914e+07	1.01848e+07	1.35221e+07
SD	B4-L.2	F	B	1.81184e+07	6.4429e+08	2.96526e+06	1.09204e+06	406527	2.1522e+06	2.89352e+06	2.28134e+07	2.2638e+06	2.71018e+06	2.46069e+07	1.09587e+08	494210	2.9153e+06	2.50004e+06	644078	1.20595e+07	1.12798e+07	1.63053e+07
SD	B6-L.2	F	B	1.77281e+07	5.80953e+08	2.11309e+06	801516	174876	1.31157e+06	1.66861e+06	1.57243e+07	1.20956e+06	1.47187e+06	1.58409e+07	8.23958e+07	480909	2.65155e+06	2.3241e+06	814634	1.0718e+07	9.91138e+06	2.2075e+07
SD	B6-LL.2	F	B	1.34787e+07	5.92355e+08	2.3078e+06	764549	219454	644203	1.96801e+06	1.50574e+07	1.37336e+06	1.26717e+06	1.68342e+07	7.65115e+07	169900	2.15875e+06	1.0412e+06	458127	7.75346e+06	5.62247e+06	1.23556e+07
SD	B6-R.2	F	B	1.36961e+07	4.85714e+08	2.11231e+06	677417	92375	819058	1.87213e+06	1.66152e+07	1.05307e+06	1.05923e+06	1.63442e+07	7.86234e+07	338708	3.33238e+06	1.07739e+06	363305	8.01776e+06	7.27236e+06	2.12345e+07
SD	B7-0.2	F	B	2.93004e+07	1.07684e+09	7.14677e+06	2.43354e+06	1.03495e+06	8.22368e+06	2.8671e+06	2.79857e+07	6.65727e+06	1.80697e+07	3.65311e+07	1.57201e+08	1.04894e+06	1.07344e+07	1.05054e+07	486626	1.65453e+07	1.79766e+07	5.29421e+07
SD	B7-RL.2	F	B	1.88802e+07	5.67346e+08	4.13968e+06	1.31478e+06	616068	3.66636e+06	1.93836e+06	1.77908e+07	2.96764e+06	5.96534e+06	2.51611e+07	9.50247e+07	525912	4.90114e+06	2.32609e+06	305877	8.50053e+06	7.95991e+06	1.82103e+07
SD	M1-R	F	B+M	9.66406e+06	2.84956e+08	1.23443e+06	456401	18378.6	98018.9	1.25587e+06	9.23829e+06	848476	790278	8.44188e+06	4.70185e+07	134776	1.59192e+06	702052	456111	6.89085e+06	4.68631e+06	8.02218e+06
SD	M6-0	F	B+M	1.25441e+07	4.48413e+08	1.97184e+06	737888	31003.7	155019	1.699e+06	1.7052e+07	1.01692e+06	1.56879e+06	1.02188e+07	7.80425e+07	291435	2.99939e+06	879239	336730	7.3644e+06	6.55376e+06	1.17668e+07
SD	M6-LL	F	B+M	1.16983e+07	3.81911e+08	1.36585e+06	390987	83410.5	286724	1.76205e+06	1.31736e+07	1.04263e+06	1.62129e+06	9.40975e+06	7.00023e+07	312789	2.20459e+06	947918	297917	5.40042e+06	5.83917e+06	8.89418e+06
SD	M6-LLR	F	B+M	1.43347e+07	4.68867e+08	2.50239e+06	666880	25405	114322	2.15307e+06	1.6329e+07	1.49254e+06	1.2766e+06	1.21182e+07	7.55861e+07	317562	3.54219e+06	1.86364e+06	887143	7.92046e+06	7.48008e+06	1.34922e+07
SD	M6-RL	F	B+M	1.55499e+07	5.60643e+08	2.3832e+06	910203	41688.7	222340	1.91768e+06	1.61474e+07	1.47995e+06	1.13254e+06	1.29721e+07	7.56997e+07	416887	4.62309e+06	1.50339e+06	719932	8.87916e+06	8.63919e+06	1.73207e+07
SD	M6-RR	F	B+M	1.26985e+07	4.6475e+08	1.59421e+06	613158	85842.2	214605	2.06021e+06	1.53719e+07	1.31829e+06	1.63713e+06	1.04114e+07	7.31069e+07	349500	3.10165e+06	1.08069e+06	525082	7.12524e+06	7.25346e+06	1.40795e+07
SD	M6-RRL	F	B+M	1.11547e+07	3.7788e+08	1.61129e+06	616537	67352.8	238325	1.64237e+06	1.02169e+07	1.01029e+06	1.15018e+06	7.26374e+06	6.22495e+07	331583	3.59235e+06	1.03646e+06	211634	5.16061e+06	5.06293e+06	1.17267e+07
SD	M8-0	F	B+M	1.51444e+07	5.39362e+08	4.89904e+06	1.01146e+06	516050	2.02292e+06	2.13301e+06	1.80618e+07	1.38301e+06	2.13301e+06	2.10136e+07	7.663e+07	419721	4.42652e+06	2.33973e+06	365364	8.66333e+06	7.11054e+06	1.73688e+07
SD	M8-L	F	B+M	2.08318e+07	7.31298e+08	4.55551e+06	1.33714e+06	599410	2.49908e+06	2.70195e+06	2.81446e+07	2.96938e+06	3.59646e+06	3.50609e+07	1.19845e+08	617853	2.51076e+06	1.74857e+06	304878	9.7023e+06	7.37088e+06	1.59075e+07
SD	M8-R	F	B+M	2.19426e+07	7.304e+08	5.60391e+06	1.58292e+06	800558	3.19314e+06	3.18404e+06	2.46172e+07	2.23792e+06	4.37578e+06	2.95388e+07	1.14625e+08	655002	4.81656e+06	3.13388e+06	525281	1.01584e+07	9.07222e+06	1.9934e+07
SD	M8-RL	F	B+M	1.9203e+07	7.29023e+08	4.9111e+06	1.22318e+06	469038	3.1913e+06	2.83262e+06	2.542e+07	3.1729e+06	5.28817e+06	3.29798e+07	1.17922e+08	423054	3.57228e+06	1.1639e+06	886355	1.11287e+07	8.69344e+06	1.41817e+07
HFHS	B1-RL.2	F	B	1.61093e+07	5.46477e+08	2.67627e+06	917948	109895	232719	963199	1.481e+07	1.0537e+06	717551	1.07762e+07	7.6222e+07	329686	2.93746e+06	1.04254e+06	426194	1.15925e+07	6.7732e+06	1.94803e+07
HFHS	B2-0.2	F	B	1.5893e+07	4.61997e+08	2.00474e+06	815182	60383.8	362303	1.89001e+06	1.7149e+07	1.82359e+06	1.58206e+06	1.17809e+07	8.17054e+07	603838	3.68687e+06	2.13569e+06	657566	8.16619e+06	6.5026e+06	1.41686e+07
HFHS	B2-L.2	F	B	1.31173e+07	4.46564e+08	1.68887e+06	616210	125524	193992	1.02702e+06	1.14341e+07	878670	1.10119e+06	8.66118e+06	6.03373e+07	445041	3.02703e+06	1.66458e+06	324936	9.66256e+06	7.37661e+06	1.33452e+07
HFHS	B2-R.2	F	B	1.47611e+07	4.49692e+08	1.81217e+06	648021	212184	206449	1.09533e+06	1.37461e+07	1.16414e+06	1.08386e+06	9.70885e+06	7.33812e+07	315409	2.96355e+06	1.2179e+06	249379	9.5692e+06	6.45486e+06	1.21036e+07
HFHS	B2-RL.2	F	B	1.74333e+07	5.41488e+08	2.71324e+06	818169	90907.6	181815	1.53144e+06	1.85102e+07	1.63634e+06	1.03495e+06	1.34334e+07	9.16559e+07	461531	5.31813e+06	2.44589e+06	523585	1.16834e+07	8.53443e+06	2.08761e+07
HFHS	B5-0.2	F	B	1.70279e+07	4.97463e+08	1.95217e+06	636029	201514	1.58063e+06	1.43579e+06	1.71413e+07	1.72546e+06	1.24687e+06	1.72546e+07	7.85338e+07	484893	4.02805e+06	3.23083e+06	307698	9.33583e+06	8.68547e+06	1.89234e+07
HFHS	B5-LL.2	F	B	1.86444e+07	5.71127e+08	3.24445e+06	680287	194368	1.0765e+06	1.5998e+06	2.22925e+07	2.09319e+06	1.56242e+06	2.25691e+07	9.15173e+07	403687	5.95743e+06	2.55428e+06	451205	1.01942e+07	8.7029e+06	2.76153e+07
HFHS	B8-0.2	F	B	1.35963e+07	4.78791e+08	2.94648e+06	936382	393281	2.99018e+06	1.23602e+06	1.47074e+07	2.30974e+06	6.55468e+06	1.6137e+07	7.15146e+07	543102	5.78975e+06	5.42515e+06	1.05003e+06	8.48045e+06	7.51792e+06	2.978e+07
HFHS	B8-R.2	F	B	1.82201e+07	5.76081e+08	3.37578e+06	1.15797e+06	471040	3.10101e+06	1.3019e+06	1.63883e+07	2.83932e+06	6.25436e+06	1.93715e+07	8.73059e+07	588799	2.9919e+06	3.08713e+06	357123	9.44392e+06	8.38049e+06	1.48008e+07
HFHS	M2-L	F	B+M	1.28991e+07	3.39288e+08	1.30716e+06	440035	25884.4	168248	811044	1.16307e+07	1.39344e+06	711821	1.00863e+07	5.73253e+07	250216	3.39614e+06	2.90773e+06	442974	1.04383e+07	7.05351e+06	1.88718e+07
HFHS	M9-LL	F	B+M	1.39108e+07	4.88976e+08	3.37736e+06	852058	580387	2.27833e+06	1.46949e+06	1.34045e+07	2.22893e+06	1.0342e+07	1.84674e+07	6.87574e+07	524818	3.52553e+06	3.2472e+06	192691	7.71477e+06	6.82982e+06	1.33813e+07
HFHS	M9-RL	F	B+M	1.89741e+07	6.40704e+08	3.85847e+06	1.05809e+06	851249	5.4655e+06	1.45588e+06	1.87275e+07	5.5371e+06	6.1099e+06	2.76457e+07	1.09915e+08	763738	2.72929e+06	3.01576e+06	505230	6.06277e+06	5.98464e+06	1.26568e+07
SD	B3-0.2	M	B	1.26258e+07	6.65656e+08	2.03311e+06	683399	8542.48	93967.3	1.51202e+06	2.01005e+07	1.12761e+06	973843	1.14384e+07	8.65524e+07	452752	1.25296e+07	3.29244e+06	833272	1.80373e+07	1.63403e+07	5.66117e+07
SD	B3-L.2	M	B	1.06628e+07	4.49388e+08	2.51709e+06	891731	145460	151784	2.11233e+06	1.53112e+07	904380	936002	1.01759e+07	6.38821e+07	455352	5.84297e+06	1.81226e+06	929564	1.43575e+07	1.417e+07	2.49498e+07
SD	B3-RL.2	M	B	1.21165e+07	6.06342e+08	2.19228e+06	895769	102149	227871	1.39866e+06	1.93926e+07	895769	1.29651e+06	1.12914e+07	9.29007e+07	455742	7.5474e+06	3.67221e+06	867305	1.64696e+07	1.41445e+07	3.69712e+07
SD	B4-0.2	M	B	1.19388e+07	5.15178e+08	2.82058e+06	887292	100993	468894	1.91165e+06	1.96791e+07	1.77458e+06	1.03157e+06	1.60795e+07	9.80061e+07	389543	8.60946e+06	4.03326e+06	356788	1.3969e+07	1.28289e+07	5.64346e+07
SD	B4-R.2	M	B	9.9385e+06	4.26115e+08	2.21129e+06	706383	141277	859945	1.53562e+06	1.64986e+07	1.82431e+06	1.27149e+06	1.35687e+07	8.03987e+07	350120	8.68668e+06	2.94956e+06	323979	1.08465e+07	9.37513e+06	4.48778e+07
SD	B6-0.2	M	B	1.29427e+07	6.42208e+08	2.77949e+06	708346	115491	808439	1.3628e+06	1.99338e+07	1.44749e+06	1.3474e+06	1.78549e+07	9.30089e+07	408069	5.90206e+06	2.07781e+06	241814	1.23325e+07	1.29057e+07	3.01641e+07
SD	B6-RL.2	M	B	1.32127e+07	6.10367e+08	2.4605e+06	701899	100271	539923	1.49636e+06	2.03551e+07	1.38066e+06	1.14926e+06	1.78406e+07	8.58708e+07	393372	5.84324e+06	2.24481e+06	269041	1.19471e+07	1.10391e+07	4.21722e+07
SD	B6-RR.2	M	B	1.43905e+07	6.78264e+08	2.9666e+06	814557	130731	482700	1.65928e+06	2.24556e+07	1.43804e+06	1.43804e+06	2.0374e+07	1.08185e+08	432419	5.48861e+06	1.51979e+06	260535	1.51284e+07	1.50502e+07	3.76994e+07
SD	B6-RRL.2	M	B	2.7299e+07	1.29396e+09	5.48451e+06	1.17415e+06	30898.7	818815	3.61514e+06	4.33817e+07	2.30195e+06	1.31319e+06	4.01528e+07	2.07222e+08	710669	8.63461e+06	1.59358e+06	374004	1.64074e+07	1.36918e+07	5.5255e+07
SD	B7-L.2	M	B	1.33962e+07	6.81081e+08	3.66632e+06	953907	738241	5.05986e+06	1.41012e+06	1.60837e+07	2.44698e+06	9.53078e+06	1.87878e+07	8.78009e+07	389858	6.81775e+06	2.95023e+06	214863	1.08423e+07	1.19249e+07	2.63537e+07
SD	B7-R.2	M	B	1.23103e+07	6.63528e+08	3.08977e+06	1.16273e+06	528513	4.78101e+06	1.11394e+06	1.50504e+07	3.21173e+06	5.02494e+06	1.7815e+07	8.15699e+07	430942	7.96463e+06	4.0691e+06	241060	1.37115e+07	1.40201e+07	2.73652e+07
SD	B7-RR.2	M	B	1.1756e+07	6.75738e+08	3.73744e+06	891890	620076	5.13899e+06	1.461e+06	1.69544e+07	3.16833e+06	6.26871e+06	1.8942e+07	8.50693e+07	407721	9.23207e+06	3.17147e+06	291737	1.16883e+07	1.246e+07	3.70883e+07
SD	M1-0	M	B+M	2.17419e+06	8.05832e+07	345110	69022	0	9860.29	152834	2.6327e+06	305669	276088	1.69104e+06	1.38438e+07	69022	5.70235e+06	771379	263636	8.7781e+06	5.54612e+06	3.9604e+07
SD	M1-L	M	B+M	7.41792e+06	2.95403e+08	991744	346707	8062.96	20157.4	507966	9.31675e+06	814359	717603	6.26895e+06	4.52937e+07	141102	3.21892e+06	535385	198291	7.28388e+06	4.72593e+06	2.41981e+07
SD	M1-RL	M	B+M	1.13298e+07	3.64419e+08	1.32922e+06	433567	28524.1	119801	952706	1.5654e+07	1.44332e+06	1.34634e+06	1.23795e+07	7.0021e+07	199669	3.09544e+06	616760	186192	7.7735e+06	5.57411e+06	1.49477e+07
SD	M1-RR	M	B+M	6.42233e+06	2.39565e+08	759684	294877	4997.92	69970.9	549771	6.92212e+06	694711	769680	4.82299e+06	3.57601e+07	194919	4.07815e+06	1.32983e+06	231868	7.51525e+06	5.53073e+06	2.13455e+07
SD	M6-L	M	B+M	1.05193e+07	4.96121e+08	1.71416e+06	536447	92490.9	357631	1.22088e+06	1.39969e+07	1.10989e+06	1.38736e+06	9.21825e+06	7.16681e+07	425458	5.53664e+06	1.59114e+06	620931	1.03941e+07	1.0517e+07	1.80587e+07
SD	M6-R	M	B+M	1.17509e+07	5.31851e+08	1.76674e+06	527283	102717	362935	1.24631e+06	1.69826e+07	1.15728e+06	1.56131e+06	1.07579e+07	8.55431e+07	486196	5.59614e+06	1.07006e+06	303667	8.7268e+06	8.10501e+06	1.61232e+07
SD	M9-0	M	B+M	1.57946e+07	8.12286e+08	4.85835e+06	1.04107e+06	793200	5.45325e+06	1.42776e+06	2.21699e+07	3.12322e+06	5.69121e+06	2.7296e+07	1.11921e+08	575070	8.72106e+06	3.12583e+06	552229	1.37432e+07	1.5254e+07	3.85831e+07
SD	M9-L	M	B+M	1.12827e+07	6.42125e+08	3.66865e+06	853910	877630	4.64907e+06	1.06739e+06	1.63824e+07	3.37611e+06	4.03235e+06	2.1577e+07	7.78877e+07	513927	6.72789e+06	2.28134e+06	207395	1.00213e+07	1.06684e+07	2.86786e+07
SD	M9-R	M	B+M	1.54395e+07	7.05311e+08	4.16723e+06	1.34689e+06	705085	5.31525e+06	1.09379e+06	1.90554e+07	3.41695e+06	5.75819e+06	2.64859e+07	9.45627e+07	578531	1.02061e+07	2.82317e+06	294503	1.22676e+07	1.45017e+07	4.70189e+07
SD	M9-RR	M	B+M	1.33964e+07	8.2339e+08	4.6833e+06	1.35647e+06	831707	5.15856e+06	1.16835e+06	2.21392e+07	4.79222e+06	6.41603e+06	2.97929e+07	9.72899e+07	425755	7.32967e+06	2.99021e+06	464942	1.3538e+07	1.35562e+07	4.06505e+07
HFHS	B1-0.2	M	B	1.70447e+07	7.42382e+08	2.52808e+06	872054	184981	211407	1.19797e+06	1.99603e+07	1.17155e+06	828011	1.14688e+07	9.96432e+07	616604	6.50747e+06	2.23455e+06	426440	1.4371e+07	1.12665e+07	3.41834e+07
HFHS	B1-L.2	M	B	1.67702e+07	8.49897e+08	2.68689e+06	922666	233201	405568	1.29782e+06	2.12923e+07	1.11531e+06	1.23698e+06	1.28666e+07	1.01666e+08	537377	6.25894e+06	2.96144e+06	178527	1.86298e+07	1.36836e+07	3.59154e+07
HFHS	B1-R.2	M	B	1.22085e+07	5.70491e+08	2.49507e+06	1.03841e+06	129801	237969	1.27638e+06	1.7653e+07	1.13937e+06	1.10331e+06	1.04129e+07	7.31647e+07	591317	4.98131e+06	1.33134e+06	254301	1.68886e+07	1.20195e+07	2.87959e+07
HFHS	B1-RR.2	M	B	1.57716e+07	7.59591e+08	2.60969e+06	1.15356e+06	245841	548414	1.3994e+06	2.08208e+07	1.25757e+06	1.96672e+06	1.18003e+07	1.05059e+08	491681	5.85851e+06	1.40926e+06	100662	1.88439e+07	1.40624e+07	2.94939e+07
HFHS	B5-R.2	M	B	1.26624e+07	6.01146e+08	2.36416e+06	573824	130067	864562	703891	1.73754e+07	1.65261e+06	1.38483e+06	1.60518e+07	8.89581e+07	420805	6.03375e+06	1.55292e+06	137498	1.16469e+07	9.22048e+06	3.26842e+07
HFHS	B5-RL.2	M	B	1.77197e+07	8.09519e+08	4.65704e+06	1.13839e+06	563444	3.72563e+06	1.40286e+06	2.90001e+07	2.78272e+06	2.94371e+06	2.87241e+07	1.1063e+08	643936	6.54357e+06	4.02901e+06	409568	1.62303e+07	1.53255e+07	2.96223e+07
HFHS	B5-RR.2	M	B	1.48224e+07	6.32389e+08	3.21999e+06	829279	224129	1.70338e+06	1.08329e+06	2.02015e+07	1.94246e+06	1.64362e+06	1.96786e+07	9.53073e+07	493085	5.48485e+06	1.89998e+06	329808	1.33285e+07	9.52858e+06	2.99695e+07
HFHS	B5-RRL.2	M	B	5.53937e+06	2.58119e+08	907132	338019	151763	1.60731e+06	306976	7.88135e+06	641546	1.06234e+06	6.45685e+06	3.11564e+07	172459	1.90513e+06	1.73962e+06	95624.1	5.41379e+06	5.62711e+06	1.01582e+07
HFHS	B8-L.2	M	B	1.85284e+07	8.57912e+08	4.72104e+06	1.68265e+06	788443	5.49025e+06	1.05767e+06	1.96918e+07	3.33646e+06	7.13444e+06	2.09322e+07	1.08305e+08	740367	7.68572e+06	2.42054e+06	196539	1.38405e+07	1.55887e+07	2.93361e+07
HFHS	B8-LL.2	M	B	1.62665e+07	7.1406e+08	4.96573e+06	1.36926e+06	797291	5.5377e+06	1.62058e+06	2.09895e+07	3.73513e+06	7.49626e+06	2.19688e+07	9.75901e+07	667298	8.22942e+06	3.96873e+06	355817	1.20613e+07	1.21799e+07	3.57733e+07
HFHS	B8-RL.2	M	B	1.49014e+07	6.29508e+08	5.10344e+06	1.17953e+06	605493	5.20567e+06	1.08517e+06	1.92342e+07	2.51633e+06	7.83209e+06	2.06654e+07	9.831e+07	817809	5.18802e+06	2.30492e+06	226585	1.06261e+07	9.89943e+06	2.00254e+07
HFHS	B8-RR.2	M	B	2.09554e+07	8.99819e+08	5.14619e+06	1.40648e+06	915847	6.20377e+06	1.43919e+06	2.63633e+07	3.53255e+06	1.47299e+07	2.84676e+07	1.25515e+08	741400	8.9409e+06	3.6477e+06	379729	1.4959e+07	1.60982e+07	4.20119e+07
HFHS	M2-R	M	B+M	4.13915e+06	1.44687e+08	423843	145099	34365.6	103097	286380	5.50996e+06	920235	599489	4.50572e+06	2.93253e+07	187102	3.68212e+06	902241	97539.6	9.6808e+06	7.51867e+06	1.33629e+07
HFHS	M2-RL	M	B+M	5.51213e+06	2.20655e+08	567294	147407	17867.5	40201.9	254612	5.67294e+06	486890	616429	3.36803e+06	3.0683e+07	192076	5.04635e+06	1.30484e+06	108136	9.02577e+06	6.32236e+06	2.44748e+07
HFHS	M7-0	M	B+M	1.35653e+07	6.74446e+08	2.10363e+06	703789	216550	564578	1.44625e+06	2.01933e+07	1.19876e+06	1.39984e+06	1.03789e+07	7.25985e+07	525908	6.37656e+06	1.06155e+06	618025	1.45418e+07	1.0281e+07	2.4721e+07
HFHS	M7-L	M	B+M	1.22114e+07	6.24213e+08	1.87926e+06	673838	194664	217126	1.15301e+06	1.84033e+07	1.06317e+06	1.34019e+06	1.06092e+07	8.47014e+07	449225	4.98162e+06	1.70286e+06	276342	1.59307e+07	1.27715e+07	2.12634e+07
HFHS	M7-R	M	B+M	1.34781e+07	5.60442e+08	2.08715e+06	719707	111227	183198	902905	1.41193e+07	745878	889819	9.61136e+06	6.56634e+07	281340	4.39553e+06	1.09724e+06	229961	1.27201e+07	1.01051e+07	1.99277e+07
HFHS	M7-RL	M	B+M	1.52008e+07	6.85306e+08	1.79448e+06	772511	56329	281645	1.31971e+06	1.71321e+07	1.11853e+06	1.0622e+06	1.0107e+07	8.61753e+07	539149	8.68143e+06	1.90762e+06	238452	1.83343e+07	1.45014e+07	2.87203e+07

[truncated: 2 more sheets: Spearman_SD, Spearman_HFHS]
